# Supplementary material for: Direct synthesis of 8-aryl tetrahydroquinolines via pd-catalyzed ortho-arylation of arylureas in water
Source: Royal Society of Chemistry journal article supplement (doi:10.1039/c2ra22901c), 2012-11-15
Supplement: c2ra22901c.pdf [file c2ra22901c.pdf]

Supplementary Material (ESI) for Organic & Biomolecular Chemistry  
This journal is (C) The Royal Society of Chemistry 2012

## **Direct Synthesis of 8-Aryl Tetrahydroquinolines via Pd-catalyzed *ortho*-Arylation of Aryl Ureas in Water**

Zhen Jiang,<sup>a</sup> Lingjuan Zhang,<sup>a</sup> Chaonan Dong,<sup>a</sup> Xiaoming Su,<sup>a</sup> Huanrong Li,<sup>a\*</sup> Weijun Tang,<sup>a</sup> Lijin Xu,<sup>a\*</sup> Qinghua Fan<sup>b</sup>

<sup>a</sup> Department of Chemistry, Renmin University of China, Beijing 100872, China.  
[xulj@chem.ruc.edu.cn](mailto:xulj@chem.ruc.edu.cn)

<sup>b</sup> Beijing National Laboratory for Molecular Sciences, CAS Key Laboratory of Molecular Recognition and Function, Institute of Chemistry, Chinese Academy of Sciences, Beijing 100190. China.

### **Contents:**

|                                                                                              |            |
|----------------------------------------------------------------------------------------------|------------|
| <b>1. General information</b> -----                                                          | <b>S2</b>  |
| <b>2. The general procedure for the direct arylation of ureas</b> -----                      | <b>S2</b>  |
| <b>3. References</b> -----                                                                   | <b>S9</b>  |
| <b>4. <sup>1</sup>H and <sup>13</sup>C NMR spectra of ureas and the arylated ureas</b> ----- | <b>S10</b> |
| <b>5. HPLC spectra of the chiral arylated ureas</b> -----                                    | <b>S59</b> |

## 1. General information:

Unless otherwise noted, all experiments were carried out in air, and all commercially available chemicals were used as received from Aldrich, Acros or Strem without further purification.  $^1\text{H}$  NMR and  $^{13}\text{C}$  NMR spectra were recorded on a Bruker Model Avance DMX 400 Spectrometer ( $^1\text{H}$  400 MHz and  $^{13}\text{C}$  106 MHz, respectively). Chemical shifts ( $\delta$ ) are given in ppm and are referenced to residual solvent peaks.  $\text{Et}_2\text{O}$  was dried by distillation from  $\text{Na}/\text{Ph}_2\text{CO}$ . Tetrahydroquinolines were prepared according to the previous reports.<sup>1,2</sup>

## 2. The general procedure for the synthesis of *N*-urea tetrahydroquinolines

To a solution of 1,2,3,4-tetrahydroquinoline (5.0 mmol) in anhydrous  $\text{Et}_2\text{O}$  was added dropwise a solution of *n*-BuLi in hexane (2.6 mL, 6.5 mmol) in an ice bath. The resulting mixture was stirred at room temperature under  $\text{N}_2$  for 1 h. Then the mixture was cooled to 0 °C, and dimethylcarbamic chloride (6.0 mmol, 646 mg) was added dropwise. After being stirred at room temperature for 12 h, the reaction was quenched with saturated aqueous  $\text{NH}_4\text{Cl}$ , and extracted with  $\text{CH}_2\text{Cl}_2$  (3 × 20 ml). The combined organic layer was washed with brine, dried ( $\text{Na}_2\text{SO}_4$ ), filtered, and concentrated in vacuo. The residue was then purified via flash chromatography on silica gel using a mixture of ethyl acetate and hexane to give the pure product.

***N,N*-dimethyl-3,4-dihydroquinoline-1(2H)-carboxamide (1a)**, yellow oil;  $^1\text{H}$  NMR (400 MHz,  $\text{CDCl}_3$ )  $\delta$  1.97 (m, 2H), 2.75 (t,  $J = 6.64$  Hz, 2H), 2.82 (s, 6H), 3.56 (t,  $J = 6.16$  Hz, 2H), 6.87 (d,  $J = 6.08$  Hz, 2H), 7.06 (d,  $J = 6.88$  Hz, 2H);  $^{13}\text{C}$  NMR (100.6 MHz,  $\text{CDCl}_3$ )  $\delta$  23.5, 26.9, 37.8, 45.4, 119.3, 121.6, 126.4, 127.6, 129.0, 140.9, 160.9; IR (neat,  $\text{cm}^{-1}$ ): 1645; HRMS (ESI) calcd. for  $\text{C}_{12}\text{H}_{16}\text{N}_2\text{NaO}$   $[\text{M}+\text{H}]^+$ : 227.1155, found: 227.1152.

***N,N*,2-trimethyl-3,4-dihydroquinoline-1(2H)-carboxamide (1b)**, yellow oil;  $^1\text{H}$  NMR (400 MHz,  $\text{CDCl}_3$ )  $\delta$  1.18 (d,  $J = 6.52$  Hz, 3H), 1.73 (m, 1H), 2.03 (m, 1H), 2.71 (m, 2H), 2.78 (s, 6H), 4.73 (m, 1H), 6.77 (d,  $J = 8.2$  Hz, 1H), 6.85 (t,  $J = 7.36$  Hz, 1H), 7.07 (m, 2H);  $^{13}\text{C}$  NMR (100.6 MHz,  $\text{CDCl}_3$ )  $\delta$  19.0, 24.2, 29.7, 37.7, 49.5, 119.5, 121.3, 126.6, 127.4, 128.7, 139.5, 160.6; IR (neat,  $\text{cm}^{-1}$ ): 1645; HRMS (ESI) calcd. for  $\text{C}_{13}\text{H}_{18}\text{N}_2\text{NaO}$   $[\text{M}+\text{H}]^+$ : 241.1311, found: 241.1309.

**6-methoxy-*N,N*,2-trimethyl-3,4-dihydroquinoline-1(2H)-carboxamide (1c)**, yellow oil;  $^1\text{H}$  NMR (400 MHz,  $\text{CDCl}_3$ )  $\delta$  1.15 (d,  $J = 6.52$  Hz, 3H), 1.63 (m, 1H), 2.07 (m, 1H), 2.65 (m, 2H), 2.73 (s, 6H), 3.75 (s, 3H), 4.23 (m, 1H), 6.66 (m, 2H), 6.79 (d,  $J = 8.44$  Hz, 1H);  $^{13}\text{C}$  NMR (100.6 MHz,  $\text{CDCl}_3$ )  $\delta$  18.9, 24.7, 30.2, 37.8, 49.4, 55.4, 112.4, 113.4, 121.7, 139.7, 132.7, 154.6, 160.9; IR (neat,  $\text{cm}^{-1}$ ): 1645; HRMS (ESI) calcd. for  $\text{C}_{14}\text{H}_{20}\text{N}_2\text{NaO}_2$   $[\text{M}+\text{H}]^+$ : 271.1417, found: 271.1414.

**2-ethyl-*N,N*-dimethyl-3,4-dihydroquinoline-1(2H)-carboxamide (1d)**, yellow oil;  $^1\text{H}$  NMR (400 MHz,  $\text{CDCl}_3$ )  $\delta$  0.85 (t,  $J = 7.52$  Hz, 3H), 1.59 (m, 1H), 1.65 (m, 1H), 1.81 (m, 1H), 1.91 (m, 1H), 2.61 (m, 2H), 2.68 (s, 6H), 3.96 (m, 1H), 6.77 (m, 2H), 6.98 (m, 2H);  $^{13}\text{C}$  NMR (100.6 MHz,  $\text{CDCl}_3$ )  $\delta$  10.5, 23.9, 25.2, 26.4, 37.8, 54.9, 119.9, 121.5, 126.5, 127.5, 128.8, 139.6, 160.5; IR (neat,  $\text{cm}^{-1}$ ): 1645; HRMS (ESI)

calcd. for  $C_{14}H_{20}N_2NaO$   $[M+H]^+$ : 255.1468, found: 255.1464.

***N,N*-dimethyl-2-propyl-3,4-dihydroquinoline-1(2H)-carboxamide (1e)**, yellow oil;  $^1H$  NMR (400 MHz,  $CDCl_3$ )  $\delta$  0.91 (t,  $J = 7.2$  Hz, 3H), 1.38 (m, 3H), 1.68 (m, 1H), 1.86 (m, 1H), 2.01 (m, 1H), 2.75 (m, 2H), 2.81 (s, 6H), 4.14 (m, 1H), 6.87 (m, 2H), 7.08 (m, 2H);  $^{13}C$  NMR (100.6 MHz,  $CDCl_3$ )  $\delta$  14.1, 19.4, 23.9, 26.9, 34.5, 37.9, 53.5, 120.2, 121.5, 126.5, 127.5, 128.9, 139.6, 160.6; IR (neat,  $cm^{-1}$ ): 1645; HRMS (ESI) calcd. for  $C_{15}H_{22}N_2NaO$   $[M+H]^+$ : 269.1624, found: 269.1621.

**2-butyl-*N,N*-dimethyl-3,4-dihydroquinoline-1(2H)-carboxamide (1f)**, yellow oil;  $^1H$  NMR (400 MHz,  $CDCl_3$ )  $\delta$  0.86 (t,  $J = 7.08$  Hz, 3H), 1.31 (m, 6H), 1.69 (m, 1H), 1.84 (m, 1H), 1.93 (m, 1H), 2.70 (m, 1H), 2.74 (s, 6H), 4.09 (m, 1H), 6.84 (m, 2H), 7.06 (m, 2H);  $^{13}C$  NMR (100.6 MHz,  $CDCl_3$ )  $\delta$  14.1, 22.7, 23.9, 26.8, 28.3, 31.9, 37.9, 53.7, 120.2, 121.5, 126.5, 127.5, 128.8, 139.6, 160.6; IR (neat,  $cm^{-1}$ ): 1645; HRMS (ESI) calcd. for  $C_{16}H_{24}N_2NaO$   $[M+H]^+$ : 283.1781, found: 283.1777.

***N,N*-dimethyl-2-pentyl-3,4-dihydroquinoline-1(2H)-carboxamide (1g)**, yellow oil;  $^1H$  NMR (400 MHz,  $CDCl_3$ )  $\delta$  0.85 (t,  $J = 7.04$  Hz, 3H), 1.33 (m, 8H), 1.71 (m, 1H), 1.87 (m, 1H), 1.96 (m, 1H), 2.70 (m, 1H), 2.76 (s, 6H), 4.11 (m, 1H), 6.86 (m, 2H), 7.08 (m, 2H);  $^{13}C$  NMR (100.6 MHz,  $CDCl_3$ )  $\delta$  14.0, 22.6, 23.9, 25.7, 26.7, 31.8, 32.2, 53.7, 120.2, 121.5, 126.5, 127.5, 128.8, 139.6, 160.6; IR (neat,  $cm^{-1}$ ): 1645; HRMS (ESI) calcd. for  $C_{17}H_{26}N_2NaO$   $[M+H]^+$ : 297.1937, found: 297.1932.

**2-isobutyl-*N,N*-dimethyl-3,4-dihydroquinoline-1(2H)-carboxamide (1h)**, yellow oil;  $^1H$  NMR (400 MHz,  $CDCl_3$ )  $\delta$  0.94 (d,  $J = 6.52$  Hz, 6H), 1.27 (m, 2H), 1.56 (m, 1H), 1.68 (m, 1H), 1.86 (m, 1H), 2.01 (m, 1H), 2.73 (m, 3H), 2.76 (s, 6H), 4.23 (m, 1H), 6.88 (m, 2H), 7.08 (m, 2H);  $^{13}C$  NMR (100.6 MHz,  $CDCl_3$ )  $\delta$  21.9, 23.7, 23.9, 24.9, 26.9, 37.9, 41.1, 51.9, 120.5, 121.6, 126.5, 127.4, 128.9, 139.5, 160.7; IR (neat,  $cm^{-1}$ ): 1645; HRMS (ESI) calcd. for  $C_{17}H_{26}N_2NaO$   $[M+H]^+$ : 297.1937, found: 297.1935.

**2-cyclohexyl-*N,N*-dimethyl-3,4-dihydroquinoline-1(2H)-carboxamide (1i)**, yellow oil;  $^1H$  NMR (400 MHz,  $CDCl_3$ )  $\delta$  0.86 (m, 1H), 0.99 (m, 2H), 1.13 (m, 2H), 1.28 (m, 2H), 1.43 (m, 1H), 1.57 (m, 1H), 1.70 (d,  $J = 8.04$  Hz, 2H), 1.90 (m, 1H), 2.06 (m, 1H), 2.68 (s, 6H), 2.75 (m, 2H), 3.95 (m, 1H), 6.91 (t,  $J = 7.4$  Hz, 2H), 7.09 (t,  $J = 7.2$  Hz, 2H);  $^{13}C$  NMR (100.6 MHz,  $CDCl_3$ )  $\delta$  23.8, 24.9, 26.1, 26.3, 26.4, 29.4, 30.1, 37.7, 38.3, 58.1, 121.6, 122.1, 126.5, 127.8, 129.1, 139.8, 160.8; IR (neat,  $cm^{-1}$ ): 1645; HRMS (ESI) calcd. for  $C_{18}H_{26}N_2NaO$   $[M+H]^+$ : 309.1937, found: 309.1934.

***N,N*-dimethyl-2-phenyl-3,4-dihydroquinoline-1(2H)-carboxamide (1j)**, yellow oil;  $^1H$  NMR (400 MHz,  $CDCl_3$ )  $\delta$  2.27 (m, 2H), 2.68 (m, 2H), 2.85 (s, 6H), 5.24 (t,  $J = 5.04$  Hz, 1H), 6.92 (t,  $J = 7.32$  Hz, 1H), 7.00 (d,  $J = 8.12$  Hz, 1H), 7.07 (d,  $J = 7.32$  Hz, 1H), 7.19 (m, 2H), 7.28 (m, 4H);  $^{13}C$  NMR (100.6 MHz,  $CDCl_3$ )  $\delta$  24.3, 30.4, 37.9, 58.0, 119.9, 121.5, 126.4, 126.6, 126.9, 127.7, 128.4, 128.9, 140.3, 143.1, 160.9; IR (neat,  $cm^{-1}$ ): 1651; HRMS (ESI) calcd. for  $C_{18}H_{20}N_2NaO$   $[M+H]^+$ : 303.1468, found: 303.1473.

***N,N*-dimethyl-2H-benzo[b][1,4]oxazine-4(3H)-carboxamide (1k)**, yellow oil;  $^1H$  NMR (400 MHz,  $CDCl_3$ )  $\delta$  2.93 (s, 6H), 3.68 (t,  $J = 4.52$  Hz, 2H), 4.32 (t,  $J = 4.68$  Hz, 2H), 6.85 (m, 3H), 6.94 (m, 1H);  $^{13}C$  NMR (100.6 MHz,  $CDCl_3$ )  $\delta$  38.1, 43.4, 66.3, 117.1, 119.3, 120.6, 122.9, 128.1, 144.8, 159.2; IR (neat,  $cm^{-1}$ ): 1645; HRMS (ESI)

calcd. for  $C_{11}H_{14}N_2NaO_2$   $[M+H]^+$ : 229.0948, found: 229.0945.

***N,N*-dimethylindoline-1-carboxamide (11)**, red oil;  $^1H$  NMR (400 MHz,  $CDCl_3$ )  $\delta$  2.93 (s, 6H), 3.02 (t,  $J = 8.20$  Hz, 2H), 3.90 (t,  $J = 8.20$  Hz, 2H), 6.87 (td,  $J = 7.41$ , 0.84 Hz, 1H), 6.95 (d,  $J = 7.93$  Hz, 1H), 7.14 (q,  $J = 7.64$  Hz, 2H);  $^{13}C$  NMR (100.6 MHz,  $CDCl_3$ )  $\delta$  28.1, 38.1, 50.3, 113.3, 121.3, 124.8, 126.9, 131.3, 144.3, 160.2; IR (neat,  $cm^{-1}$ ): 1645; HRMS (ESI) calcd. for  $C_{11}H_{14}N_2NaO$   $[M+Na]^+$ : 213.0998, found: 213.0995.

**1,1,3-Trimethyl-3-phenyl-urea (1m)**, brown liquid;  $^1H$  NMR (400 MHz,  $CDCl_3$ )  $\delta$  2.57 (s, 6H), 3.09 (s, 3H), 6.96 (m, 3H), 7.20 (t,  $J = 8.08$  Hz, 2H);  $^{13}C$  NMR (100.6 MHz,  $CDCl_3$ )  $\delta$  37.8, 39.4, 123.4, 124.0, 129.3, 146.8, 161.7; IR (neat,  $cm^{-1}$ ): 1645; HRMS (ESI) calcd. for  $C_{10}H_{14}N_2NaO$   $[M+Na]^+$ : 201.0998, found: 201.0997.

### 3. The general procedure for the arylation of *N*-urea tetrahydroquinolines

*N*-urea tetrahydroquinoline (0.5 mmol),  $Pd(MeCN)_2(Tos)_2$  (25 mg, 10 mmol%),  $AgOAc$  (167 mg, 1.0 mmol),  $TsOH$  (285 mg, 1.5 mmol) and 1-iodo-4-methoxybenzene (234 mg, 1.0 mmol) were sequentially added in air to a reaction tube. Then  $H_2O$  (3.0 mL) was added and the resulting mixture was vigorously stirred for 16 h at 80 °C. After cooling to room temperature, the reaction mixture was neutralized by adding aqueous  $NaHCO_3$  solution and extracted with  $CH_2Cl_2$ . The combined organic phases were dried over  $Na_2SO_4$  and concentrated in vacuo. The residue was then purified by flash chromatography (hexane/ethylacetate = 10/1) to give the pure product.

***N,N*-dimethyl-8-*p*-tolyl-3,4-dihydroquinoline-1(2H)-carboxamide (3aa)** yellow solid, mp: 123. °C;  $^1H$  NMR (400 MHz,  $CDCl_3$ )  $\delta$  1.29 (m, 2H), 2.10 (s, 6H), 2.37 (s, 3H), 2.70 (s, 2H), 3.71 (bs, 2H), 7.11 (m, 2H), 7.18 (m, 2H), 7.22 (m, 3H);  $^{13}C$  NMR (100.6 MHz,  $CDCl_3$ )  $\delta$  21.1, 25.1, 27.6, 36.8, 45.0, 124.1, 126.9, 127.3, 129.0, 129.1, 134.6, 135.2, 136.4, 136.6, 138.7, 159.8; IR (neat,  $cm^{-1}$ ): 1645; HRMS (ESI) calcd. for  $C_{19}H_{22}N_2NaO$   $[M+Na]^+$ : 317.1624, found: 317.1621.

***N,N*-dimethyl-8-phenyl-3,4-dihydroquinoline-1(2H)-carboxamide (3ab)**, yellow solid, mp: 119 °C;  $^1H$  NMR (400 MHz,  $CDCl_3$ )  $\delta$  1.27 (m, 2H), 2.08 (s, 6H), 2.69 (s, 2H), 3.70 (bs, 2H), 7.14 (m, 3H), 7.28 (m, 3H), 7.34 (m, 2H);  $^{13}C$  NMR (100.6 MHz,  $CDCl_3$ )  $\delta$  25.0, 27.6, 36.7, 45.1, 124.1, 127.0, 127.2, 127.4, 128.4, 129.2, 134.5, 135.2, 138.7, 139.3, 159.8; IR (neat,  $cm^{-1}$ ): 1645; HRMS (ESI) calcd. for  $C_{18}H_{20}N_2NaO$   $[M+Na]^+$ : 303.1468, found: 303.1465.

**8-(4-methoxyphenyl)-*N,N*-dimethyl-3,4-dihydroquinoline-1(2H)-carboxamide (3ac)**, yellow solid, mp: 149 °C;  $^1H$  NMR (400 MHz,  $CDCl_3$ )  $\delta$  2.04 (s, 2H), 2.13 (s, 6H), 2.68 (s, 2H), 3.69 (bs, 2H), 3.81 (s, 3H), 6.95 (d,  $J = 8.72$  Hz, 2H), 7.08 (m, 1H), 7.13 (m, 2H), 7.23 (d,  $J = 8.68$  Hz, 2H);  $^{13}C$  NMR (100.6 MHz,  $CDCl_3$ )  $\delta$  25.1, 27.6, 36.8, 45.0, 55.3, 113.8, 123.9, 126.7, 128.6, 129.1, 132.0, 134.5, 134.9, 138.8, 158.7, 159.6; IR (neat,  $cm^{-1}$ ): 1651; HRMS (ESI) calcd. for  $C_{19}H_{22}N_2NaO_2$   $[M+Na]^+$ : 333.1574, found: 333.1571.

**8-(4-isopropylphenyl)-*N,N*-dimethyl-3,4-dihydroquinoline-1(2H)-carboxamide (3ad)**, yellow, mp: 117 °C;  $^1H$  NMR (400 MHz,  $CDCl_3$ )  $\delta$  1.27 (d,  $J = 6.92$  Hz, 6H), 2.04 (bs, 2H), 2.09 (s, 6H), 2.70 (s, 2H), 2.93 (m, 1H), 3.71 (bs, 2H), 7.10 (t,  $J = 7.36$

Hz, 1H), 7.15 (d,  $J = 5.92$  Hz, 1H), 7.20 (dd,  $J = 7.36, 1.48$  Hz, 1H), 7.24 (d,  $J = 8.16$  Hz, 2H), 7.29 (d,  $J = 8.24$  Hz, 2H);  $^{13}\text{C}$  NMR (100.6 MHz,  $\text{CDCl}_3$ )  $\delta$  24.0, 25.1, 27.6, 33.9, 36.6, 45.0, 123.9, 126.3, 126.9, 127.4, 129.1, 134.4, 135.2, 136.9, 138.9, 147.7, 159.6; IR (neat,  $\text{cm}^{-1}$ ): 1645; HRMS (ESI) calcd. for  $\text{C}_{21}\text{H}_{26}\text{N}_2\text{NaO}$   $[\text{M}+\text{Na}]^+$ : 345.1937, found: 345.1933.

**8-(3,5-dimethylphenyl)-*N,N*-dimethyl-3,4-dihydroquinoline-1(2H)-carboxamide (3ae)**, yellow, mp: 116 °C;  $^1\text{H}$  NMR (400 MHz,  $\text{CDCl}_3$ )  $\delta$  2.07 (s, 2H), 2.11 (s, 6H), 2.37 (s, 6H), 2.70 (s, 2H), 3.70 (bs, 2H), 6.91 (s, 2H), 6.95 (d,  $J = 8.36$  Hz, 1H), 7.09 (t,  $J = 7.41$  Hz, 1H), 7.15 (dd,  $J = 7.28, 1.64$  Hz, 1H), 7.20 (dd,  $J = 7.44, 1.66$  Hz, 1H);  $^{13}\text{C}$  NMR (100.6 MHz,  $\text{CDCl}_3$ )  $\delta$  21.5, 25.1, 27.7, 36.7, 45.1, 123.8, 125.3, 126.9, 128.5, 129.1, 134.5, 135.4, 137.7, 138.9, 139.2, 159.8; IR (neat,  $\text{cm}^{-1}$ ): 1645; HRMS (ESI) calcd. for  $\text{C}_{20}\text{H}_{24}\text{N}_2\text{NaO}$   $[\text{M}+\text{Na}]^+$ : 331.1781, found: 331.1779.

**8-(3,4-dimethylphenyl)-*N,N*-dimethyl-3,4-dihydroquinoline-1(2H)-carboxamide (3af)**, yellow solid, mp: 121 °C;  $^1\text{H}$  NMR (400 MHz,  $\text{CDCl}_3$ )  $\delta$  1.28 (s, 2H), 2.10 (s, 6H), 2.29 (s, 3H), 2.32 (s, 3H), 2.69 (s, 2H), 3.71 (bs, 2H), 7.05 (m, 2H), 7.12 (m, 2H), 7.19 (m, 2H);  $^{13}\text{C}$  NMR (100.6 MHz,  $\text{CDCl}_3$ )  $\delta$  19.4, 19.9, 25.1, 27.6, 29.7, 36.7, 45.0, 124.0, 124.9, 126.8, 126.5, 129.1, 129.6, 134.6, 135.2, 135.3, 136.4, 136.8, 136.7, 159.8; IR (neat,  $\text{cm}^{-1}$ ): 1645; HRMS (ESI) calcd. for  $\text{C}_{20}\text{H}_{24}\text{N}_2\text{NaO}$   $[\text{M}+\text{Na}]^+$ : 331.1781, found: 331.1776.

**8-(3-methoxyphenyl)-*N,N*-dimethyl-3,4-dihydroquinoline-1(2H)-carboxamide (3ag)**, yellow oil;  $^1\text{H}$  NMR (400 MHz,  $\text{CDCl}_3$ )  $\delta$  2.06 (bs, 2H), 2.13 (s, 6H), 2.70 (s, 2H), 3.71 (s, 2H), 3.87 (s, 3H), 6.82 (m, 2H), 6.90 (d,  $J = 7.61$  Hz, 1H), 7.02 (m, 1H), 7.17 (d,  $J = 6.42$  Hz, 1H), 7.22 (dd,  $J = 7.48, 1.36$  Hz, 1H), 7.32 (m, 1H);  $^{13}\text{C}$  NMR (100.6 MHz,  $\text{CDCl}_3$ )  $\delta$  25.1, 27.6, 36.7, 45.1, 55.3, 112.8, 112.9, 120.0, 124.0, 127.2, 129.1, 129.3, 134.6, 134.9, 138.9, 140.7, 159.5, 159.7; IR (neat,  $\text{cm}^{-1}$ ): 1645; HRMS (ESI) calcd. for  $\text{C}_{19}\text{H}_{22}\text{N}_2\text{NaO}_2$   $[\text{M}+\text{Na}]^+$ : 333.1574, found: 333.1570.

**8-(4-fluorophenyl)-*N,N*-dimethyl-3,4-dihydroquinoline-1(2H)-carboxamide (3ah)**, yellow solid, mp: 126 °C;  $^1\text{H}$  NMR (400 MHz,  $\text{CDCl}_3$ )  $\delta$  2.03 (m, 2H), 2.16 (s, 6H), 2.69 (m, 2H), 3.66 (m, 2H), 7.11 (m, 5H), 7.26 (m, 2H);  $^{13}\text{C}$  NMR (100.6 MHz,  $\text{CDCl}_3$ )  $\delta$  24.9, 27.5, 36.8, 45.2, 115.0, 115.3, 124.0, 127.4, 129.1 (t,  $J = 14.86$  Hz), 134.3, 135.6, 138.9, 159.7, 160.7, 163.2; IR (neat,  $\text{cm}^{-1}$ ): 1645; HRMS (ESI) calcd. for  $\text{C}_{18}\text{H}_{19}\text{FN}_2\text{NaO}$   $[\text{M}+\text{Na}]^+$ : 321.1374, found: 321.1371.

**8-(4-chlorophenyl)-*N,N*-dimethyl-3,4-dihydroquinoline-1(2H)-carboxamide (3ai)**, yellow solid, mp: 124 °C;  $^1\text{H}$  NMR (400 MHz,  $\text{CDCl}_3$ )  $\delta$  2.03 (m, 2H), 2.15 (s, 6H), 2.70 (m, 2H), 3.67 (m, 2H), 7.12 (m, 3H), 7.23 (d,  $J = 8.36$  Hz, 2H), 7.37 (d,  $J = 8.36$  Hz, 2H);  $^{13}\text{C}$  NMR (100.6 MHz,  $\text{CDCl}_3$ )  $\delta$  24.9, 27.5, 36.8, 45.2, 124.0, 127.6, 128.4, 128.8, 128.9, 132.8, 134.0, 134.2, 138.0, 138.8, 159.7; IR (neat,  $\text{cm}^{-1}$ ): 1645; HRMS (ESI) calcd. for  $\text{C}_{18}\text{H}_{19}\text{ClN}_2\text{NaO}$   $[\text{M}+\text{Na}]^+$ : 337.1079, found: 337.1074.

**Methyl 4-(1-(dimethylcarbamoyl)-1,2,3,4-tetrahydroquinolin-8-yl)- benzoate (3aj)**, orange solid, mp: 148 °C;  $^1\text{H}$  NMR (400 MHz,  $\text{CDCl}_3$ )  $\delta$  2.05 (s, 2H), 2.08 (s, 6H), 2.70 (s, 2H), 3.68 (bs, 2H), 3.90 (s, 3H), 7.10 (t,  $J = 7.41$  Hz, 1H), 7.16 (d,  $J = 5.40$  Hz, 2H), 7.35 (d,  $J = 8.04$  Hz, 2H), 8.06 (m, 2H);  $^{13}\text{C}$  NMR (100.6 MHz,  $\text{CDCl}_3$ )  $\delta$  20.9, 24.8, 27.5, 36.7, 45.3, 52.1, 124.1, 127.5, 128.0, 128.6, 129.0, 129.7, 134.0, 134.3, 138.7, 144.2, 159.9, 166.7, 174.5; IR (neat,  $\text{cm}^{-1}$ ): 1645, 1720; HRMS (ESI)

calcd. for HRMS (ESI) calcd. for  $C_{20}H_{22}N_2NaO_3$   $[M+Na]^+$ : 361.1523, found: 361.1518.

**8-(4-acetylphenyl)-*N,N*-dimethyl-3,4-dihydroquinoline-1(2H)-carboxamide (3ak)**, yellow solid, mp: 146 °C;  $^1H$  NMR (400 MHz,  $CDCl_3$ )  $\delta$  2.03 (s, 1H), 2.08 (s, 6H), 2.12 (d,  $J = 3.32$  Hz, 1H), 2.60 (s, 3H), 2.72 (s, 2H), 3.69 (bs, 2H), 7.11 (t,  $J = 7.32$  Hz, 1H), 7.17 (t,  $J = 7.02$  Hz, 2H), 7.38 (d,  $J = 8.16$  Hz, 2H), 8.01 (d,  $J = 8.12$  Hz, 2H);  $^{13}C$  NMR (100.6 MHz,  $CDCl_3$ )  $\delta$  24.8, 26.7, 27.6, 36.7, 45.2, 124.0, 127.6, 128.1, 128.5, 128.6, 129.0, 133.9, 134.2, 135.5, 138.9, 144.5, 159.7, 197.7; IR (neat,  $cm^{-1}$ ): 1645, 1680; HRMS (ESI) calcd. for  $C_{20}H_{23}N_2O_2$   $[M+H]^+$ : 323.1754, found: 323.1751.

***N,N*-dimethyl-8-(4-nitrophenyl)-3,4-dihydroquinoline-1(2H)-carboxamide (3al)**, yellow solid, mp: 156 °C;  $^1H$  NMR (400 MHz,  $CDCl_3$ )  $\delta$  2.04 (m, 2H), 2.16 (s, 6H), 2.77 (s, 2H), 3.69 (s, 2H), 7.16 (t,  $J = 6.24$  Hz, 2H), 7.24 (m, 1H), 7.25 (d,  $J = 8.68$  Hz, 2H), 8.28 (d,  $J = 8.72$  Hz, 2H);  $^{13}C$  NMR (100.6 MHz,  $CDCl_3$ )  $\delta$  24.6, 27.5, 36.8, 45.4, 123.6, 124.2, 126.93, 128.4, 128.8, 132.9, 134.0, 138.9, 146.5, 146.6, 159.8; IR (neat,  $cm^{-1}$ ): 1645; HRMS (ESI) calcd. for  $C_{18}H_{19}N_3NaO_3$   $[M+Na]^+$ : 348.1319, found: 348.1317.

***N,N*-dimethyl-8-(3-(trifluoromethyl)phenyl)-3,4-dihydroquinoline-1(2H)-carboxamide (3am)**, yellow oil;  $^1H$  NMR (400 MHz,  $CDCl_3$ )  $\delta$  2.07 (s, 2H), 2.15 (s, 6H), 2.76 (s, 2H), 3.69 (s, 2H), 7.17 (m, 2H), 7.21 (dd,  $J = 6.76, 2.16$  Hz, 1H), 7.47 (d,  $J = 6.88$  Hz, 1H), 7.56 (m, 3H);  $^{13}C$  NMR (100.6 MHz,  $CDCl_3$ )  $\delta$  24.7, 27.5, 36.7, 45.4, 123.6, 124.1, 124.2, 126.5, 128.1, 128.8, 128.9, 129.1, 131.3, 133.9, 134.0, 138.9, 140.5, 159.8; IR (neat,  $cm^{-1}$ ): 1645; HRMS (ESI) calcd. for  $C_{19}H_{19}F_3N_2NaO$   $[M+Na]^+$ : 371.1342, found: 371.1339.

***N,N*-dimethyl-8-(3-nitrophenyl)-3,4-dihydroquinoline-1(2H)-carboxamide (3an)**, yellow oil;  $^1H$  NMR (400 MHz,  $CDCl_3$ )  $\delta$  2.04 (s, 2H), 2.19 (s, 6H), 2.77 (s, 2H), 3.67 (s, 2H), 7.15 (m, 2H), 7.22 (dd,  $J = 6.14, 2.84$  Hz, 1H), 7.57 (t,  $J = 7.78$  Hz, 1H), 7.62 (d,  $J = 7.01$  Hz, 1H), 8.13 (m, 1H), 8.19 (m, 1H);  $^{13}C$  NMR (100.6 MHz,  $CDCl_3$ )  $\delta$  24.4, 27.5, 36.8, 45.7, 121.7, 122.5, 124.2, 128.7, 128.8, 129.3, 133.0, 133.8, 134.3, 138.8, 141.6, 148.2, 160.0; IR (neat,  $cm^{-1}$ ): 1645; HRMS (ESI) calcd. for  $C_{18}H_{19}N_3NaO_3$   $[M+Na]^+$ : 348.1319, found: 348.1314.

***N,N*,2-trimethyl-8-(*p*-tolyl)-3,4-dihydroquinoline-1(2H)-carboxamide (3ba)**, yellow solid, mp: 121 °C;  $^1H$  NMR (400 MHz,  $CDCl_3$ )  $\delta$  1.46 (d,  $J = 6.44$  Hz, 3H), 1.55 (m, 1H), 2.06 (s, 6H), 2.37 (s, 3H), 2.43 (m, 1H), 2.54 (m, 1H), 2.75 (m, 1H), 4.33 (t,  $J = 6.68$  Hz, 1H), 7.12 (m, 2H), 7.18 (dd,  $J = 8.84, 1.72$  Hz, 1H), 7.22 (d,  $J = 7.92$  Hz, 2H), 7.28 (d,  $J = 7.68$  Hz, 2H);  $^{13}C$  NMR (100.6 MHz,  $CDCl_3$ )  $\delta$  21.1, 22.7, 26.8, 29.7, 36.7, 51.2, 124.0, 125.4, 126.7, 127.4, 128.9, 129.4, 135.9, 136.5, 136.8, 137.1, 159.9; IR (neat,  $cm^{-1}$ ): 1645; HRMS (ESI) calcd. for  $C_{20}H_{24}N_2NaO$   $[M+Na]^+$ : 331.1781, found: 331.1778.

***N,N*,2-trimethyl-8-phenyl-3,4-dihydroquinoline-1(2H)-carboxamide (3bb)**, yellow solid, mp: 118 °C;  $^1H$  NMR (400 MHz,  $CDCl_3$ )  $\delta$  1.46 (m, 3H), 1.55 (m, 1H), 2.07 (s, 6H), 2.42 (d,  $J = 5.02$  Hz, 1H), 2.57 (m, 1H), 2.76 (m, 1H), 4.33 (t,  $J = 3.28$  Hz, 1H), 7.12 (t,  $J = 7.32$  Hz, 1H), 7.17 (m, 2H), 7.29 (m, 1H), 7.39 (m, 4H);  $^{13}C$  NMR (100.6 MHz,  $CDCl_3$ )  $\delta$  21.2, 26.7, 33.1, 36.6, 51.2, 124.0, 126.9, 127.0, 127.6, 128.2, 129.4, 134.4, 135.9, 137.1, 139.7, 159.8; IR (neat,  $cm^{-1}$ ): 1645; HRMS (ESI) calcd. for



$C_{19}H_{22}N_2NaO$   $[M+Na]^+$ : 317.1624, found: 317.1621.

**8-(4-methoxyphenyl)-*N,N*,2-trimethyl-3,4-dihydroquinoline-1(2H)-carboxamide (3bc)**, yellow solid, mp: 157 °C;  $^1H$  NMR (400 MHz,  $CDCl_3$ )  $\delta$  1.44 (d,  $J = 6.44$  Hz, 3H), 1.53 (m, 1H), 2.10 (s, 6H), 2.42 (d,  $J = 5.64$  Hz, 1H), 2.54 (m, 1H), 2.74 (m, 1H), 3.83 (s, 3H), 4.33 (t,  $J = 6.56$  Hz, 1H), 6.95 (d,  $J = 8.68$  Hz, 2H), 7.12 (m, 3H), 7.31 (d,  $J = 8.62$  Hz, 2H);  $^{13}C$  NMR (100.6 MHz,  $CDCl_3$ )  $\delta$  21.1, 22.7, 26.8, 29.7, 36.7, 51.2, 124.0, 125.4, 126.7, 127.4, 128.9, 129.4, 135.9, 136.5, 136.8, 137.1, 159.9; IR (neat,  $cm^{-1}$ ): 1651; HRMS (ESI) calcd. for  $C_{20}H_{24}N_2NaO_2$   $[M+Na]^+$ : 347.1730, found: 347.1725.

**8-(4-fluorophenyl)-*N,N*,2-trimethyl-3,4-dihydroquinoline-1(2H)-carboxamide (3bh)**, yellow solid, mp: 128 °C;  $^1H$  NMR (400 MHz,  $CDCl_3$ )  $\delta$  1.43 (d,  $J = 6.48$  Hz, 3H), 1.55 (m, 1H), 2.13 (s, 6H), 2.39 (m, 1H), 2.57 (m, 1H), 2.76 (m, 1H), 4.30 (m, 1H), 7.13 (m, 5H), 7.34 (m, 2H);  $^{13}C$  NMR (100.6 MHz,  $CDCl_3$ )  $\delta$  21.0, 26.5, 32.7, 36.7, 51.2, 114.9, 115.2, 124.1, 127.2, 129.3, 135.0, 135.8, 137.1, 159.9, 160.7, 163.1; IR (neat,  $cm^{-1}$ ): 1645; HRMS (ESI) calcd. for  $C_{19}H_{21}FN_2NaO$   $[M+Na]^+$ : 335.1530, found: 335.1528.

**8-(4-chlorophenyl)-*N,N*,2-trimethyl-3,4-dihydroquinoline-1(2H)-carboxamide (3bi)**, yellow solid, mp: 124 °C;  $^1H$  NMR (400 MHz,  $CDCl_3$ )  $\delta$  1.43 (d,  $J = 6.48$  Hz, 3H), 1.55 (m, 1H), 2.12 (s, 6H), 2.39 (m, 1H), 2.56 (m, 1H), 2.76 (m, 1H), 4.30 (m, 1H), 7.14 (m, 3H), 7.30 (d,  $J = 8.52$  Hz, 2H), 7.38 (d,  $J = 8.52$  Hz, 2H);  $^{13}C$  NMR (100.6 MHz,  $CDCl_3$ )  $\delta$  21.0, 26.5, 32.6, 36.7, 51.3, 124.1, 127.5, 128.0, 128.4, 128.9, 129.2, 132.7, 134.7, 137.0, 138.3, 159.9; IR (neat,  $cm^{-1}$ ): 1645; HRMS (ESI) calcd. for  $C_{19}H_{21}ClN_2NaO$   $[M+Na]^+$ : 351.1235, found: 351.1234.

**6-methoxy-8-(4-methoxyphenyl)-*N,N*,2-trimethyl-3,4-dihydroquinoline-1(2H)-carboxamide (3cc)**, brown oil;  $^1H$  NMR (400 MHz,  $CDCl_3$ )  $\delta$  1.42 (d,  $J = 6.44$  Hz, 3H), 1.49 (m, 1H), 2.10 (s, 6H), 2.38 (m, 1H), 2.49 (m, 1H), 2.68 (m, 1H), 3.82 (s, 3H), 3.83 (s, 3H), 4.31 (m, 1H), 6.71 (s, 2H), 6.91 (d,  $J = 8.64$  Hz, 2H), 7.31 (d,  $J = 8.64$  Hz, 2H);  $^{13}C$  NMR (100.6 MHz,  $CDCl_3$ )  $\delta$  21.2, 27.2, 29.7, 36.8, 51.1, 55.3, 55.4, 112.1, 113.7, 114.1, 128.6, 130.1, 132.1, 136.1, 136.8, 156.1, 158.8, 160.0; IR (neat,  $cm^{-1}$ ): 1649; HRMS (ESI) calcd. for  $C_{21}H_{26}N_2NaO_3$   $[M+Na]^+$ : 377.1836, found: 377.1834.

**2-ethyl-*N,N*-dimethyl-8-(*p*-tolyl)-3,4-dihydroquinoline-1(2H)-carboxamide (3da)**, brown solid, mp: 127 °C;  $^1H$  NMR (400 MHz,  $CDCl_3$ )  $\delta$  1.01 (t,  $J = 7.40$  Hz, 3H), 1.45 (m, 1H), 1.64 (m, 1H), 2.07 (s, 6H), 2.36 (s, 3H), 2.39 (d,  $J = 6.96$  Hz, 2H), 2.55 (m, 1H), 2.76 (m, 1H), 4.03 (m, 1H), 7.09 (t,  $J = 7.32$  Hz, 1H), 7.15 (m, 2H), 7.22 (d,  $J = 8.00$  Hz, 2H), 7.27 (d,  $J = 8.44$  Hz, 2H);  $^{13}C$  NMR (100.6 MHz,  $CDCl_3$ )  $\delta$  10.7, 21.1, 26.6, 28.3, 30.1, 36.7, 57.0, 123.9, 126.8, 127.5, 128.8, 129.4, 134.2, 135.7, 136.5, 136.9, 137.5, 159.9; IR (neat,  $cm^{-1}$ ): 1645; HRMS (ESI) calcd. for  $C_{21}H_{26}N_2NaO$   $[M+Na]^+$ : 345.1937, found: 345.1933.

**2-ethyl-*N,N*-dimethyl-8-phenyl-3,4-dihydroquinoline-1(2H)-carboxamide (3db)**, yellow solid, mp: 120 °C;  $^1H$  NMR (400 MHz,  $CDCl_3$ )  $\delta$  1.02 (t,  $J = 7.44$  Hz, 3H), 1.47 (m, 1H), 1.65 (m, 1H), 2.07 (s, 6H), 2.36 (t,  $J = 5.92$  Hz, 2H), 2.56 (m, 1H), 2.76 (m, 1H), 4.04 (m, 1H), 7.10 (t,  $J = 7.36$  Hz, 1H), 7.17 (t,  $J = 7.64$  Hz, 2H), 7.29 (m, 1H), 7.39 (m, 4H);  $^{13}C$  NMR (100.6 MHz,  $CDCl_3$ )  $\delta$  10.7, 26.4, 28.1, 29.7, 36.7, 57.0,

123.9, 126.9, 127.1, 127.6, 128.2, 129.4, 134.1, 135.7, 137.5, 139.8, 160.0; IR (neat,  $\text{cm}^{-1}$ ): 1645; HRMS (ESI) calcd. for  $\text{C}_{20}\text{H}_{24}\text{N}_2\text{NaO}$   $[\text{M}+\text{Na}]^+$ : 331.1781, found: 331.1781.

**2-ethyl-8-(4-methoxyphenyl)-*N,N*-dimethyl-3,4-dihydroquinoline-1(2H)-carboxamide (3dc)**, brown solid, mp: 158 °C;  $^1\text{H}$  NMR (400 MHz,  $\text{CDCl}_3$ )  $\delta$  1.01 (t,  $J = 7.44$  Hz, 3H), 1.44 (m, 1H), 1.63 (m, 1H), 2.10 (s, 6H), 2.36 (t,  $J = 6.26$  Hz, 2H), 2.53 (m, 1H), 2.75 (m, 1H), 3.83 (s, 3H), 4.03 (t,  $J = 7.94$  Hz, 1H), 6.95 (d,  $J = 8.68$  Hz, 2H), 7.08 (t,  $J = 7.24$  Hz, 1H), 7.13 (m, 2H), 7.30 (t,  $J = 7.96$  Hz, 2H);  $^{13}\text{C}$  NMR (100.6 MHz,  $\text{CDCl}_3$ )  $\delta$  10.7, 26.6, 28.3, 29.7, 36.8, 55.3, 57.0, 113.6, 123.9, 126.6, 128.7, 129.4, 132.4, 134.2, 135.4, 137.5, 158.6, 159.9; IR (neat,  $\text{cm}^{-1}$ ): 1645; HRMS (ESI) calcd. for  $\text{C}_{21}\text{H}_{26}\text{N}_2\text{NaO}_2$   $[\text{M}+\text{Na}]^+$ : 361.1887, found: 361.1883.

**8-(4-methoxyphenyl)-*N,N*-dimethyl-2-propyl-3,4-dihydroquinoline-1(2H)-carboxamide (3ec)**, brown solid, mp: 154 °C;  $^1\text{H}$  NMR (400 MHz,  $\text{CDCl}_3$ )  $\delta$  1.01 (t,  $J = 7.02$  Hz, 3H), 1.45 (m, 3H), 1.64 (m, 1H), 2.11 (s, 6H), 2.24 (s, 1H), 2.35 (m, 1H), 2.55 (m, 1H), 2.77 (m, 1H), 3.84 (s, 3H), 4.15 (s, 1H), 6.96 (d,  $J = 8.56$  Hz, 2H), 7.08 (t,  $J = 7.24$  Hz, 1H), 7.14 (m, 2H), 7.31 (d,  $J = 8.56$  Hz, 2H);  $^{13}\text{C}$  NMR (100.6 MHz,  $\text{CDCl}_3$ )  $\delta$  14.1, 19.6, 26.5, 29.7, 36.8, 37.2, 55.2, 55.3, 113.7, 123.9, 126.7, 128.8, 129.4, 132.4, 134.0, 135.5, 137.5, 158.7, 160.0; IR (neat,  $\text{cm}^{-1}$ ): 1645; HRMS (ESI) calcd. for  $\text{C}_{22}\text{H}_{28}\text{N}_2\text{NaO}_2$   $[\text{M}+\text{Na}]^+$ : 375.2043, found: 375.2041.

**2-butyl-8-(4-methoxyphenyl)-*N,N*-dimethyl-3,4-dihydroquinoline-1(2H)-carboxamide (3fc)**, brown solid, mp: 157 °C;  $^1\text{H}$  NMR (400 MHz,  $\text{CDCl}_3$ )  $\delta$  1.01 (t,  $J = 3.70$  Hz, 3H), 1.04 (d,  $J = 6.56$  Hz, 2H), 1.43 (m, 2H), 1.68 (m, 3H), 2.11 (s, 6H), 2.36 (m, 1H), 2.56 (m, 1H), 2.76 (m, 1H), 3.84 (s, 3H), 4.26 (bs, 1H), 6.97 (d,  $J = 8.72$  Hz, 2H), 7.09 (t,  $J = 7.31$  Hz, 1H), 7.14 (m, 2H), 7.31 (d,  $J = 8.72$  Hz, 2H);  $^{13}\text{C}$  NMR (100.6 MHz,  $\text{CDCl}_3$ )  $\delta$  19.2, 21.2, 24.1, 25.1, 26.5, 29.7, 36.8, 53.7, 55.3, 113.7, 124.0, 126.7, 128.7, 129.4, 130.9, 132.4, 135.6, 137.4, 158.6, 160.1; IR (neat,  $\text{cm}^{-1}$ ): 1645; HRMS (ESI) calcd. for  $\text{C}_{23}\text{H}_{30}\text{N}_2\text{NaO}_2$   $[\text{M}+\text{Na}]^+$ : 389.2200, found: 389.2197.

**8-(4-methoxyphenyl)-*N,N*-dimethyl-2-pentyl-3,4-dihydroquinoline-1(2H)-carboxamide (3gc)**, brown solid, mp: 159 °C;  $^1\text{H}$  NMR (400 MHz,  $\text{CDCl}_3$ )  $\delta$  0.90 (t,  $J = 3.40$  Hz, 3H), 0.99 (m, 1H), 1.45 (m, 4H), 1.63 (m, 3H), 2.11 (s, 6H), 2.27 (s, 1H), 2.36 (m, 1H), 2.56 (m, 1H), 2.76 (m, 1H), 3.84 (s, 3H), 4.17 (bs, 1H), 6.95 (d,  $J = 8.68$  Hz, 2H), 7.10 (t,  $J = 7.16$  Hz, 1H), 7.15 (m, 2H), 7.29 (d,  $J = 7.52$  Hz, 2H);  $^{13}\text{C}$  NMR (100.6 MHz,  $\text{CDCl}_3$ )  $\delta$  14.0, 22.7, 25.9, 26.5, 29.7, 31.9, 35.1, 37.0, 55.3, 55.7, 113.8, 124.0, 126.7, 128.8, 129.4, 132.2, 134.2, 135.5, 137.1, 158.8, 160.3; IR (neat,  $\text{cm}^{-1}$ ): 1645; HRMS (ESI) calcd. for  $\text{C}_{24}\text{H}_{32}\text{N}_2\text{NaO}_2$   $[\text{M}+\text{Na}]^+$ : 403.2356, found: 403.2351.

**2-isopentyl-8-(4-methoxyphenyl)-*N,N*-dimethyl-3,4-dihydroquinoline-1(2H)-carboxamide (3hc)**, brown solid, mp: 159 °C;  $^1\text{H}$  NMR (400 MHz,  $\text{CDCl}_3$ )  $\delta$  0.95 (t,  $J = 6.56$  Hz, 3H), 1.42 (m, 6H), 1.68 (m, 2H), 2.11 (s, 6H), 2.33 (m, 2H), 2.56 (m, 1H), 2.75 (m, 1H), 3.84 (s, 3H), 4.12 (bs, 1H), 6.96 (d,  $J = 8.60$  Hz, 2H), 7.08 (t,  $J = 7.28$  Hz, 1H), 7.14 (m, 2H), 7.31 (d,  $J = 8.60$  Hz, 2H);  $^{13}\text{C}$  NMR (100.6 MHz,  $\text{CDCl}_3$ )  $\delta$  14.2, 22.7, 26.5, 28.5, 29.7, 34.8, 36.8, 55.3, 55.5, 113.6, 123.9, 126.7, 128.8, 129.4, 132.4, 134.0, 135.5, 137.5, 158.6, 159.9; IR (neat,  $\text{cm}^{-1}$ ): 1645; HRMS (ESI) calcd. for  $\text{C}_{24}\text{H}_{32}\text{N}_2\text{NaO}_2$   $[\text{M}+\text{Na}]^+$ : 403.2356, found: 403.2354.



**2-cyclohexyl-8-(4-methoxyphenyl)-*N,N*-dimethyl-3,4-dihydroquinoline-1(2H)-carboxamide (3ic)**, brown oil;  $^1\text{H}$  NMR (400 MHz,  $\text{CDCl}_3$ )  $\delta$  0.90 (t,  $J = 6.62$  Hz, 1H), 1.01 (m, 4H), 1.29 (m, 3H), 1.45 (m, 1H), 1.59 (d,  $J = 4.12$  Hz, 1H), 1.73 (m, 4H), 1.91 (m, 1H), 2.08 (m, 1H), 2.70 (s, 6H), 2.76 (m, 1H), 3.88 (s, 1H), 3.97 (m, 1H), 6.83 (m, 1H), 6.98 (m, 3H), 7.12 (t,  $J = 7.16$  Hz, 2H), 7.55 (m, 1H);  $^{13}\text{C}$  NMR (100.6 MHz,  $\text{CDCl}_3$ )  $\delta$  23.8, 24.9, 26.1, 26.3, 26.4, 29.4, 30.2, 37.8, 38.3, 55.4, 58.1, 114.1, 121.7, 122.1, 126.5, 127.8, 129.1, 131.0, 131.1, 132.3, 139.8, 160.8; IR (neat,  $\text{cm}^{-1}$ ): 1645; HRMS (ESI) calcd. for  $\text{C}_{25}\text{H}_{32}\text{N}_2\text{NaO}_2$   $[\text{M}+\text{Na}]^+$ : 415.2356, found: 415.2352.

**5-(4-methoxyphenyl)-*N,N*-dimethyl-2,3-dihydrobenzo[*b*][1,4]oxazine-4-carboxamide (3kc)**, yellow solid, mp: 154 °C;  $^1\text{H}$  NMR (400 MHz,  $\text{CDCl}_3$ )  $\delta$  2.35 (s, 6H), 3.83 (s, 3H), 3.82 (m, 2H), 4.36 (t,  $J = 4.76$  Hz, 2H), 6.83 (d,  $J = 7.52$  Hz, 1H), 6.88 (d,  $J = 8.08$  Hz, 1H), 6.95 (d,  $J = 8.64$  Hz, 2H), 7.04 (t,  $J = 7.84$ , 1H), 7.28 (d,  $J = 8.64$  Hz, 2H);  $^{13}\text{C}$  NMR (100.6 MHz,  $\text{CDCl}_3$ )  $\delta$  37.1, 44.0, 55.3, 66.8, 113.6, 116.0, 123.0, 124.6, 126.3, 128.8, 130.6, 132.0, 135.2, 147.2, 158.7; IR (neat,  $\text{cm}^{-1}$ ): 1645; HRMS (ESI) calcd. for  $\text{C}_{18}\text{H}_{20}\text{N}_2\text{NaO}_3$   $[\text{M}+\text{Na}]^+$ : 335.1366, found: 335.1361.

**5-(3,5-dimethylphenyl)-*N,N*-dimethyl-2,3-dihydrobenzo[*b*][1,4]oxazine-4-carboxamide (3ke)**, yellow solid, mp: 129 °C;  $^1\text{H}$  NMR (400 MHz,  $\text{CDCl}_3$ )  $\delta$  2.32 (s, 6H), 2.36 (s, 6H), 3.80 (brs, 2H), 4.34 (t,  $J = 4.80$  Hz, 2H), 6.85 (dd,  $J = 7.52$ , 1.44 Hz, 1H), 6.89 (dd,  $J = 8.12$ , 1.48 Hz, 1H), 6.94 (m, 3H), 7.04 (t,  $J = 7.80$  Hz, 1H);  $^{13}\text{C}$  NMR (100.6 MHz,  $\text{CDCl}_3$ )  $\delta$  21.4, 36.9, 44.0, 66.8, 116.1, 123.1, 124.4, 125.4, 126.4, 128.6, 135.6, 137.68, 139.2, 147.1, 158.8; IR (neat,  $\text{cm}^{-1}$ ): 1645; HRMS (ESI) calcd. for  $\text{C}_{19}\text{H}_{22}\text{N}_2\text{NaO}_2$   $[\text{M}+\text{Na}]^+$ : 333.1574, found: 333.1572.

**5-(3,4-dimethylphenyl)-*N,N*-dimethyl-2,3-dihydrobenzo[*b*][1,4]oxazine-4-carboxamide (3kf)**, yellow solid, mp: 133 °C;  $^1\text{H}$  NMR (400 MHz,  $\text{CDCl}_3$ )  $\delta$  2.29 (s, 3H), 2.32 (m, 9H), 3.83 (bs, 2H), 3.50 (t,  $J = 4.80$  Hz, 2H), 6.89 (m, 2H), 7.06 (m, 2H), 7.12 (s, 1H), 7.17 (d,  $J = 7.72$  Hz, 1H);  $^{13}\text{C}$  NMR (100.6 MHz,  $\text{CDCl}_3$ )  $\delta$  19.4, 19.8, 37.0, 43.9, 66.9, 116.0, 123.1, 124.5, 125.1, 126.4, 128.7, 129.4, 135.2, 135.5, 136.2, 136.9, 147.1, 158.7; IR (neat,  $\text{cm}^{-1}$ ): 1645; HRMS (ESI) calcd. for  $\text{C}_{19}\text{H}_{22}\text{N}_2\text{NaO}_2$   $[\text{M}+\text{Na}]^+$ : 333.1574, found: 333.1573.

***N,N*-dimethyl-7-*p*-tolylindoline-1-carboxamide (3la)**, white solid, mp: 103 °C;  $^1\text{H}$  NMR (400 MHz,  $\text{CDCl}_3$ )  $\delta$  2.38 (s, 3H), 2.61 (s, 6H), 3.12 (t,  $J = 8.0$  Hz, 2H), 3.99 (t,  $J = 8.0$  Hz, 2H), 7.04 (t,  $J = 7.40$  Hz, 1H), 7.18 (dd,  $J = 10.4$ , 8.0 Hz, 4H), 7.35 (d,  $J = 8.0$  Hz, 2H);  $^{13}\text{C}$  NMR (100.6 MHz,  $\text{CDCl}_3$ )  $\delta$  21.1, 29.7, 36.8, 51.8, 122.9, 123.3, 126.6, 126.7, 128.8, 129.1, 133.6, 136.2, 137.4, 142.2, 159.7; IR (neat,  $\text{cm}^{-1}$ ): 1645; HRMS (ESI) calcd. for  $\text{C}_{18}\text{H}_{20}\text{N}_2\text{NaO}$   $[\text{M}+\text{Na}]^+$ : 303.1468, found: 303.1467.

**7-(4-methoxyphenyl)-*N,N*-dimethylindoline-1-carboxamide (3lb)**, orange oil;  $^1\text{H}$  NMR (400 MHz,  $\text{CDCl}_3$ )  $\delta$  2.63 (s, 6H), 3.12 (t,  $J = 7.92$  Hz, 2H), 3.84 (s, 3H), 3.98 (t,  $J = 8.0$  Hz, 2H), 6.93 (dt,  $J = 9.63$ , 2.91 Hz, 2H), 7.04 (t,  $J = 7.40$  Hz, 1H), 7.16 (m, 2H), 7.39 (dt,  $J = 9.63$ , 2.91 Hz, 2H);  $^{13}\text{C}$  NMR (100.6 MHz,  $\text{CDCl}_3$ )  $\delta$  29.8, 37.0, 51.9, 55.2, 113.7, 123.1, 123.3, 128.1, 128.8, 129.0, 132.9, 133.8, 142.3, 158.5, 159.8; IR (neat,  $\text{cm}^{-1}$ ): 1645; HRMS (ESI) calcd. for  $\text{C}_{18}\text{H}_{20}\text{N}_2\text{NaO}_2$   $[\text{M}+\text{Na}]^+$ : 319.1417, found: 319.1414.

**1-(biphenyl-2-yl)-1,3,3-trimethylurea (3mb)**, white solid, mp: 62.4 °C;  $^1\text{H}$  NMR (400 MHz,  $\text{CDCl}_3$ )  $\delta$  2.34 (s, 6H), 3.20 (s, 3H), 7.26 (m, 2H), 7.35 (m, 5H), 7.43 (m,

2H);  $^{13}\text{C}$  NMR (100.6 MHz,  $\text{CDCl}_3$ )  $\delta$  37.5, 40.1, 125.7, 126.8, 127.3, 128.0, 128.4, 128.7, 131.6, 137.6, 139.2, 143.9, 160.6; IR (neat,  $\text{cm}^{-1}$ ): 1645; HRMS (ESI) calcd. for  $\text{C}_{16}\text{H}_{18}\text{N}_2\text{NaO}$   $[\text{M}+\text{Na}]^+$ : 277.1311, found: 277.1308.

**1-(4'-methoxybiphenyl-2-yl)-1,3,3-trimethylurea (3mc)**, red solid, mp: 72.5°C;  $^1\text{H}$  NMR (400 MHz,  $\text{CDCl}_3$ )  $\delta$  2.38(s, 6H), 3.16(s, 3H), 3.83(s, 3H), 6.95(d,  $J=6.72$ , 2H), 7.19~7.24(m, 2H), 7.28(s, 1H), 7.30~7.34(m, 3H);  $^{13}\text{C}$  NMR (100.6 MHz,  $\text{CDCl}_3$ )  $\delta$  37.62, 39.93, 55.26, 113.80, 125.78, 126.81, 128.25, 129.13, 131.51, 131.64, 137.08, 143.75, 158.91, 160.72; IR (neat,  $\text{cm}^{-1}$ ): 1645; HRMS (ESI) calcd. for  $\text{C}_{17}\text{H}_{20}\text{N}_2\text{NaO}_2$   $[\text{M}+\text{Na}]^+$ : 307.1417, found: 307.1417.

**(R)-N,N,2-trimethyl-8-phenyl-3,4-dihydroquinoline-1(2H)-carboxamide**

**((R)-3bb)**,<sup>3</sup> yellow solid, mp: 118 °C;  $^1\text{H}$  NMR (400 MHz,  $\text{CDCl}_3$ )  $\delta$  1.46 (m, 3H), 1.55(m, 1H), 2.07 (s, 6H), 2.42 (d,  $J = 5.02$  Hz, 1H), 2.57 (m, 1H), 2.76 (m, 1H), 4.33 (t,  $J = 3.28$  Hz, 1H), 7.12 (t,  $J = 7.32$  Hz, 1H), 7.17 (m, 2H), 7.29 (m, 1H), 7.39 (m, 4H);  $^{13}\text{C}$  NMR (100.6 MHz,  $\text{CDCl}_3$ )  $\delta$  21.2, 26.7, 33.1, 36.6, 51.2, 124.0, 126.9, 127.0, 127.6, 128.2, 129.4, 134.4, 135.9, 137.1, 139.7, 159.8;  $[\alpha]_{\text{D}}^{22} = -100.5$  (c = 1.0,  $\text{CHCl}_3$ ); HPLC (AD-H, elute: Hexanes / i-PrOH = 90 / 10, detector: 254 nm, flow rate: 0.5ml/min), (R)  $t_1 = 15.1$  min, (S)  $t_2 = 10.3$  min.

**(R)-8-(4-methoxyphenyl)-N,N,2-trimethyl-3,4-dihydroquinoline-1(2H)-carboxamide ((R)-3bc)**, yellow solid, mp: 157 °C;  $^1\text{H}$  NMR (400 MHz,  $\text{CDCl}_3$ )  $\delta$  1.44 (d,  $J = 6.44$  Hz, 3H), 1.53 (m, 1H), 2.10 (s, 6H), 2.42 (d,  $J = 5.64$  Hz, 1H), 2.54 (m, 1H), 2.74 (m, 1H), 3.83 (s, 3H), 4.33 (t,  $J = 6.56$  Hz, 1H), 6.95 (d,  $J = 8.68$  Hz, 2H), 7.12 (m, 3H), 7.31(d,  $J = 8.62$  Hz, 2H);  $^{13}\text{C}$  NMR (100.6 MHz,  $\text{CDCl}_3$ )  $\delta$  21.1, 22.7, 26.8, 29.7, 36.7, 51.2, 124.0, 125.4, 126.7, 127.4, 128.9, 129.4, 135.9, 136.5, 136.8, 137.1, 159.9;  $[\alpha]_{\text{D}}^{22} = -108.7$  (c = 1.0,  $\text{CHCl}_3$ ); HPLC (AD-H, elute: Hexanes / i-PrOH = 90 / 10, detector: 254 nm, flow rate: 0.5ml/min), (R)  $t_1 = 12.4$  min, (S)  $t_2 = 33.3$  min.

#### 4. References:

1. A. Nose and T. Kudo. *Chem. Pharm. Bull.* **1984**, 32, 2421.
2. C. Wang, C. Li, X. Wu, A. Pettman and J. Xiao, *Angew. Chem. Int. Ed.*, **2009**, 48, 6524.
3. T. Nishikata, A. R. Abela, S. Huang and B. H. Lipshutz, *J. Am. Chem. Soc.* **2010**, 132, 4978.

## 5. $^1\text{H}$ and $^{13}\text{C}$ NMR spectra of the ureas and arylated ureas

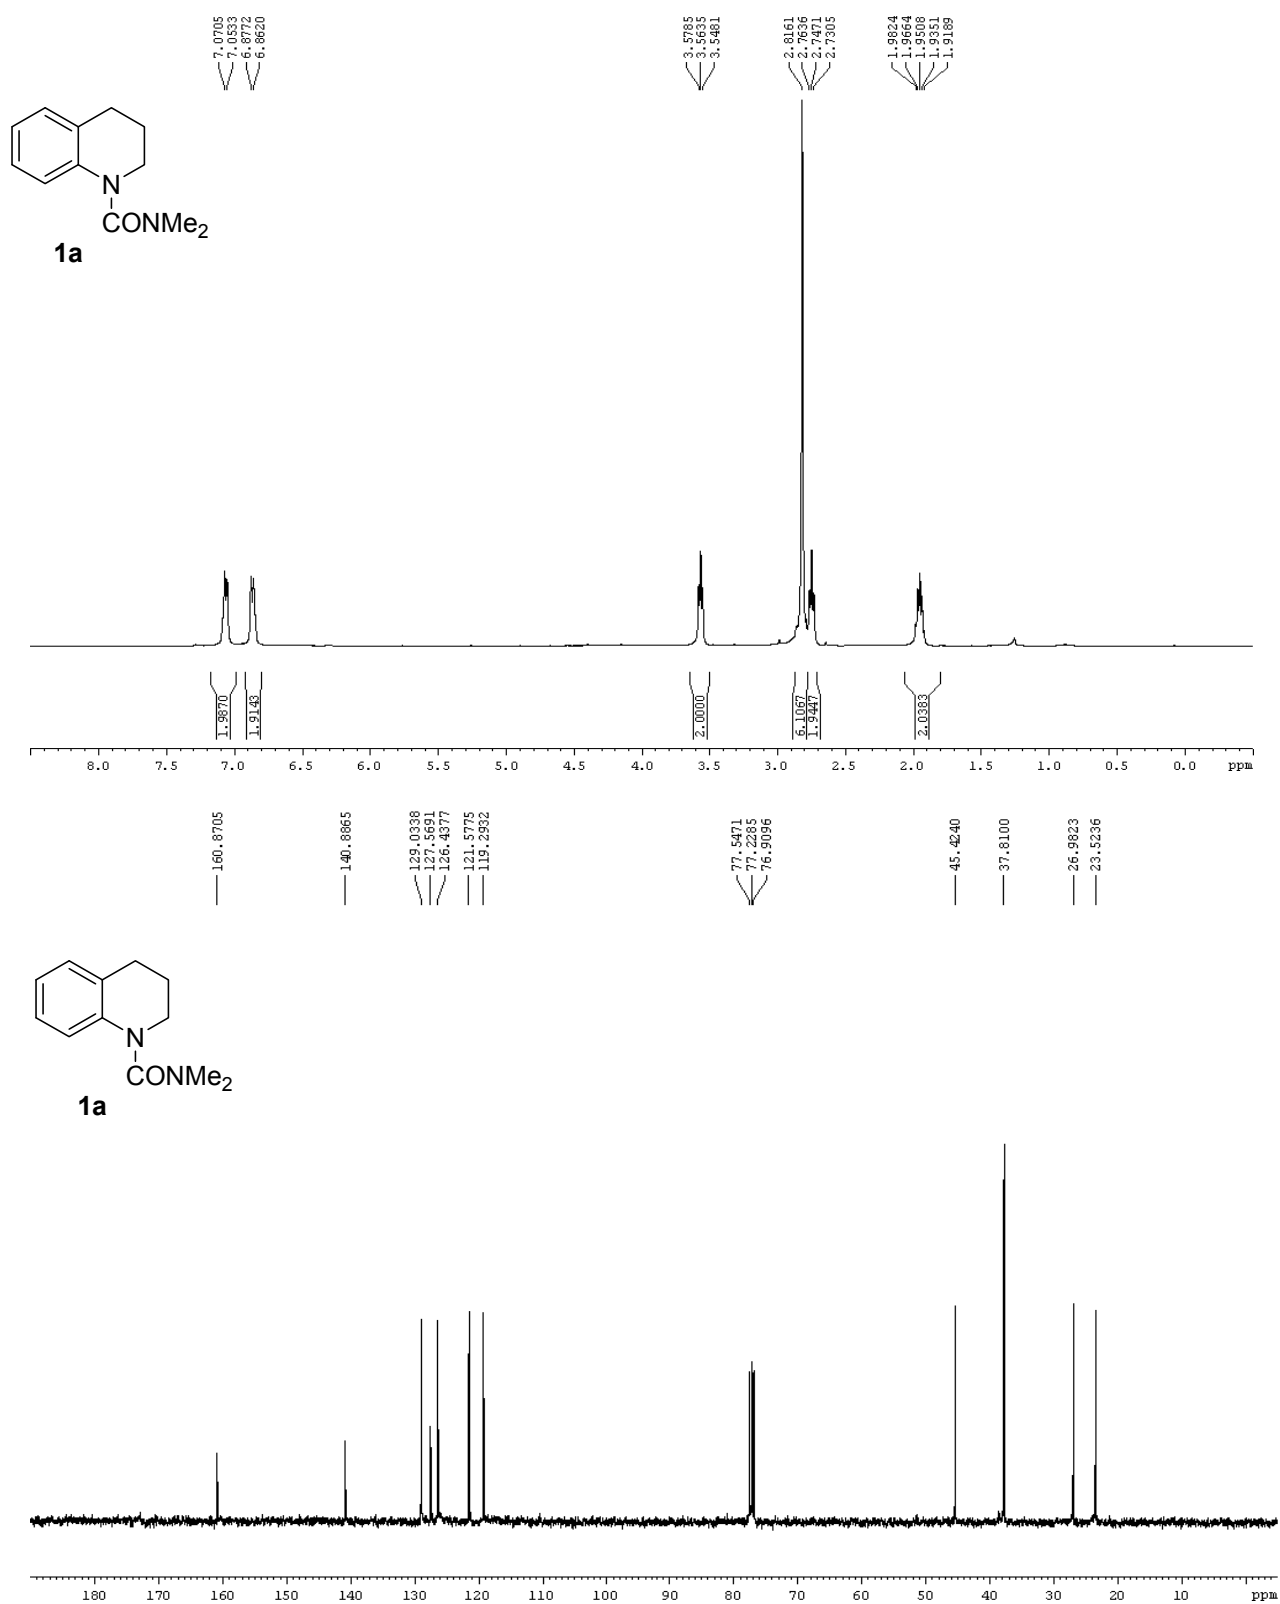

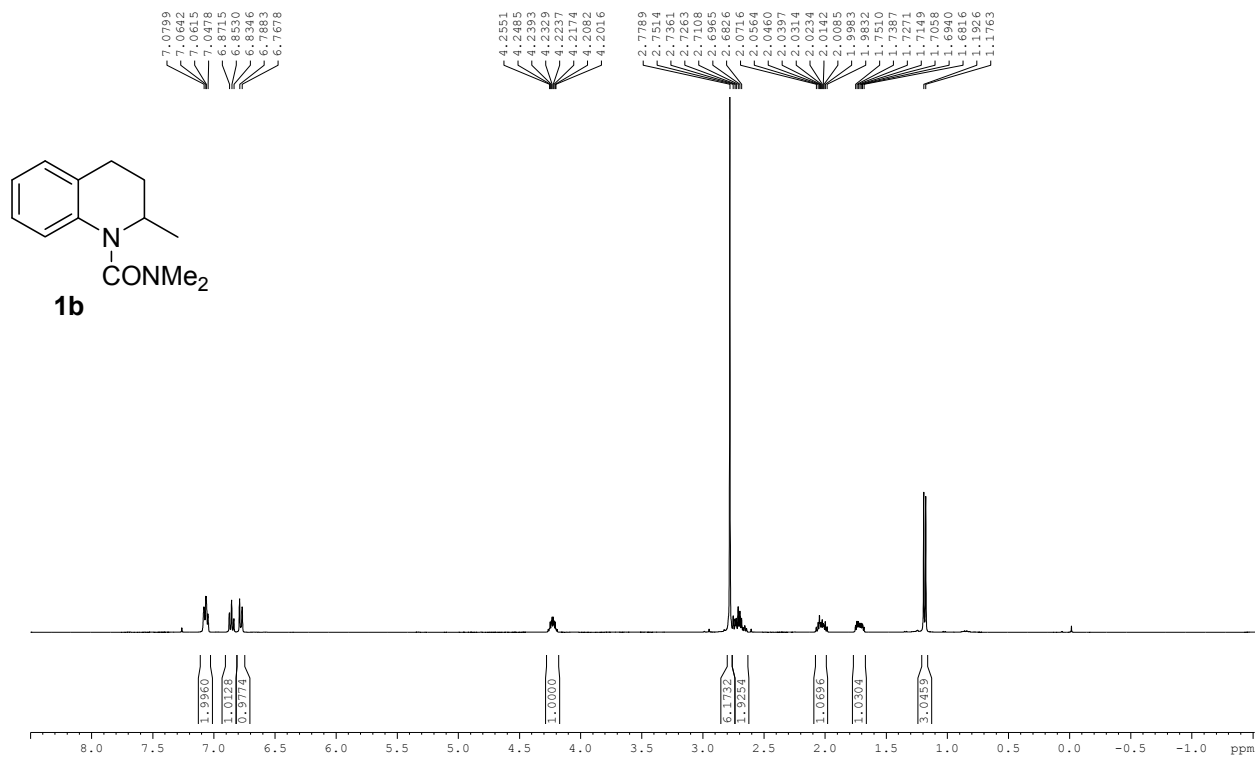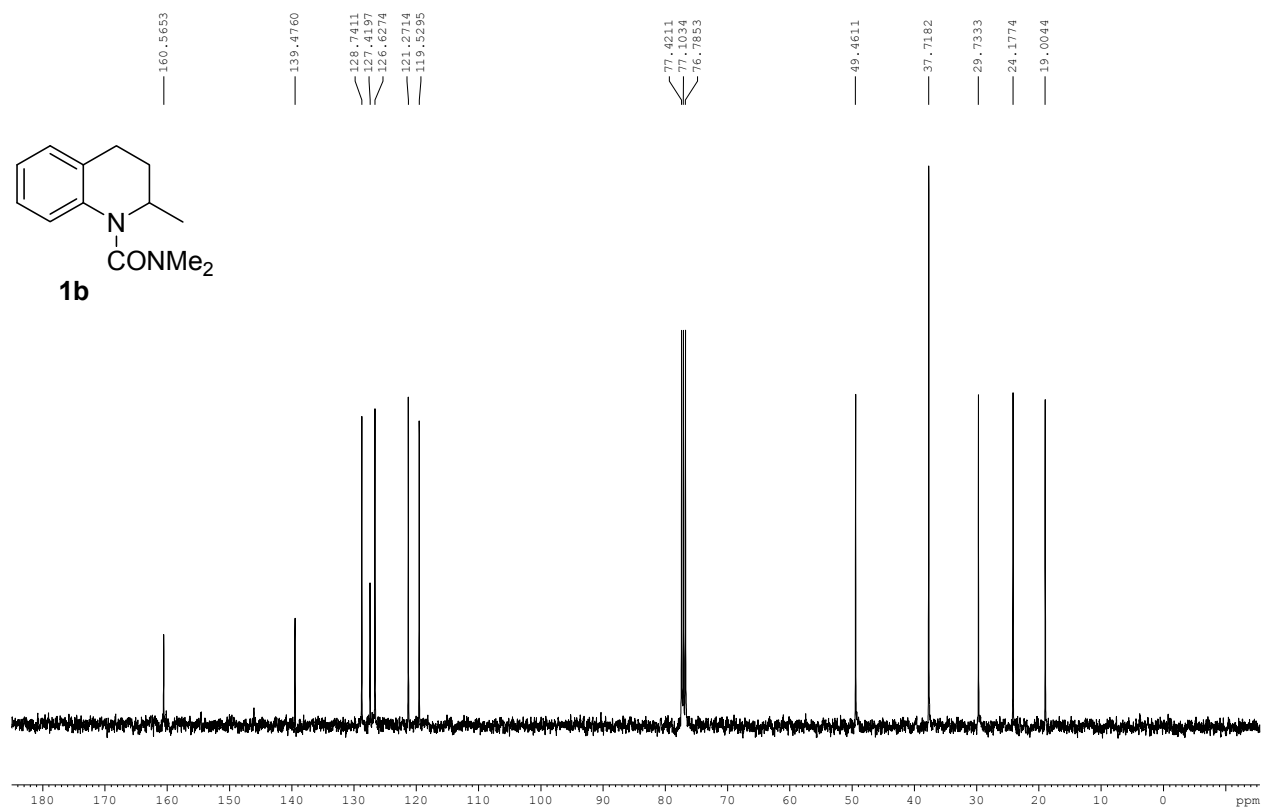

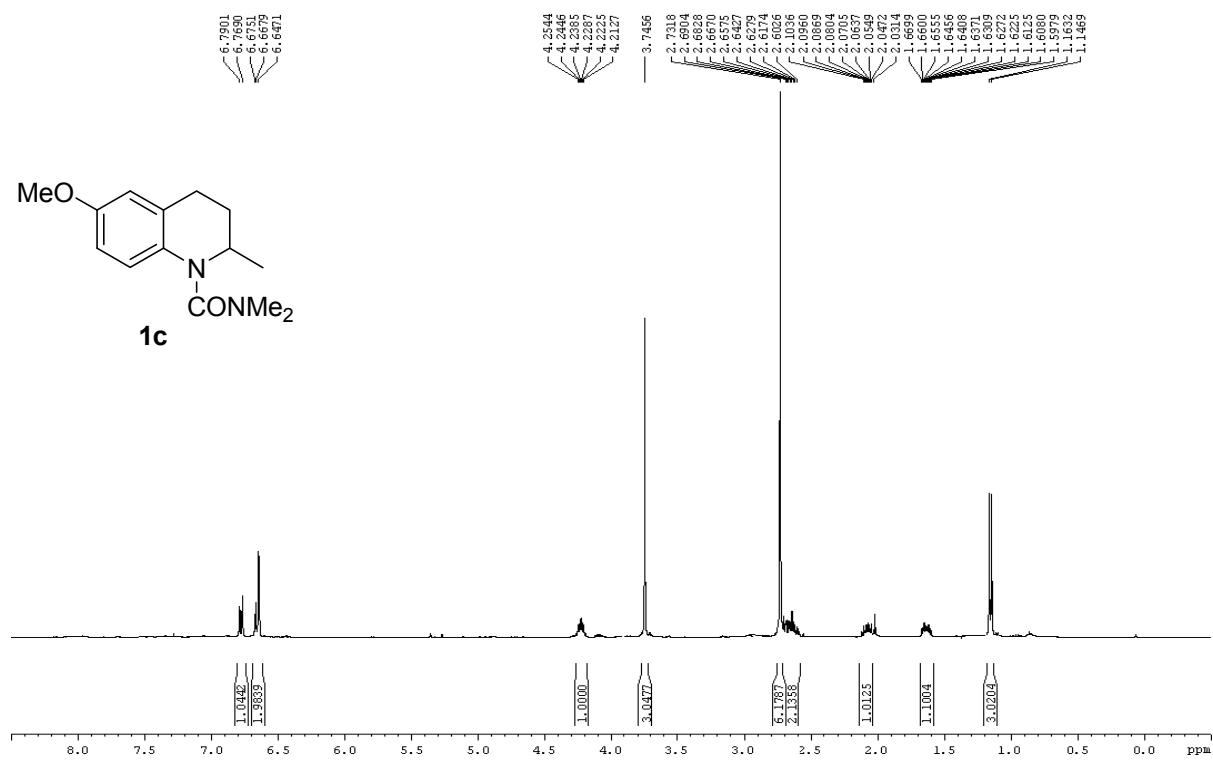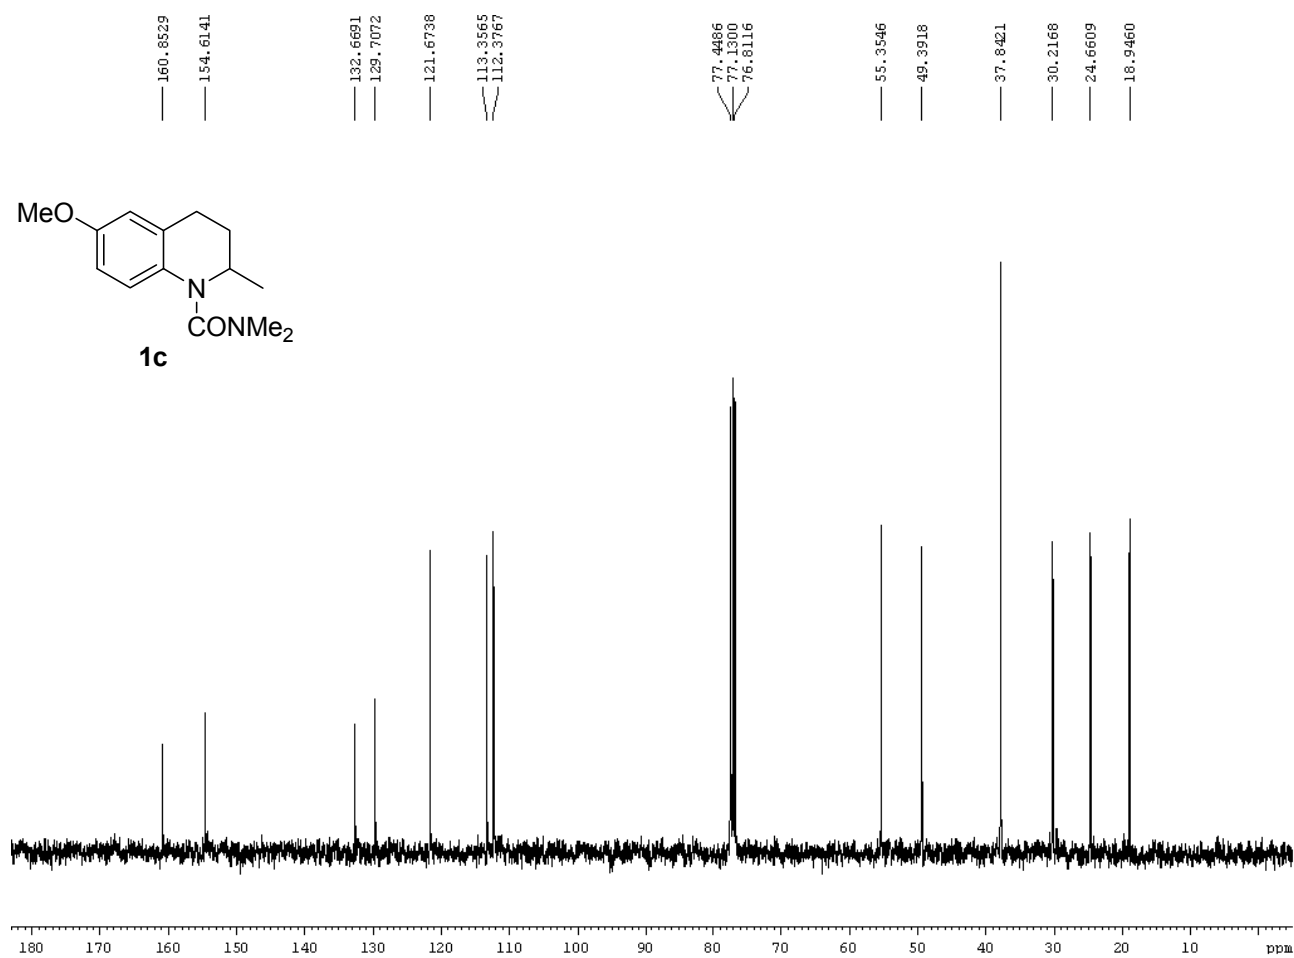



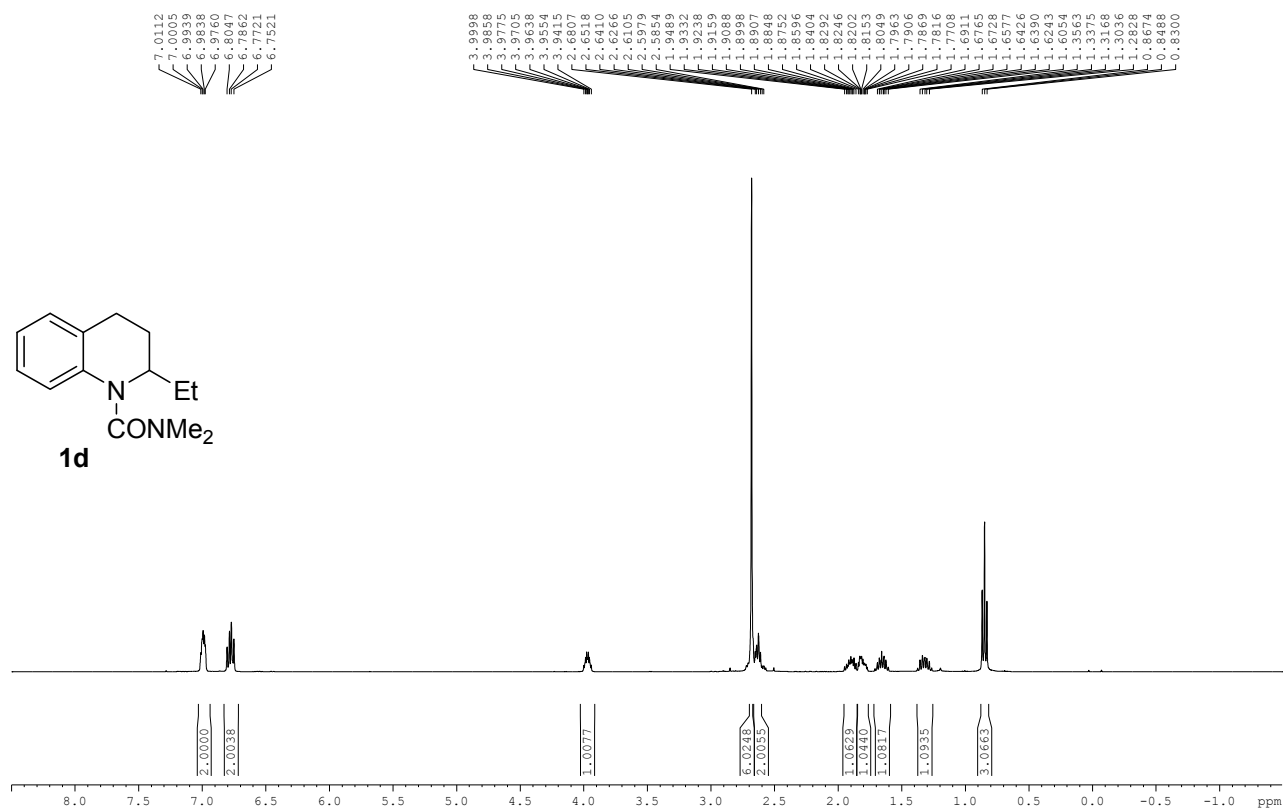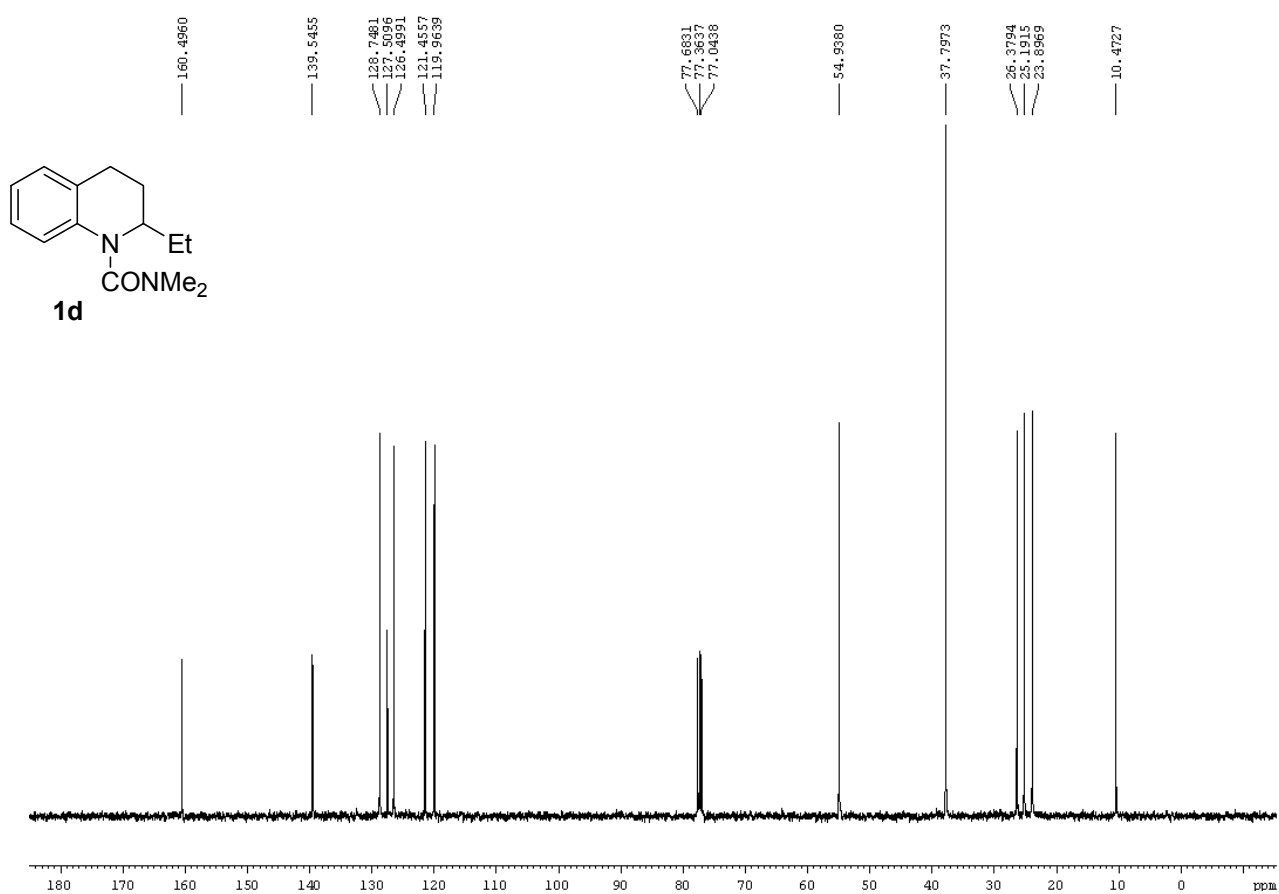

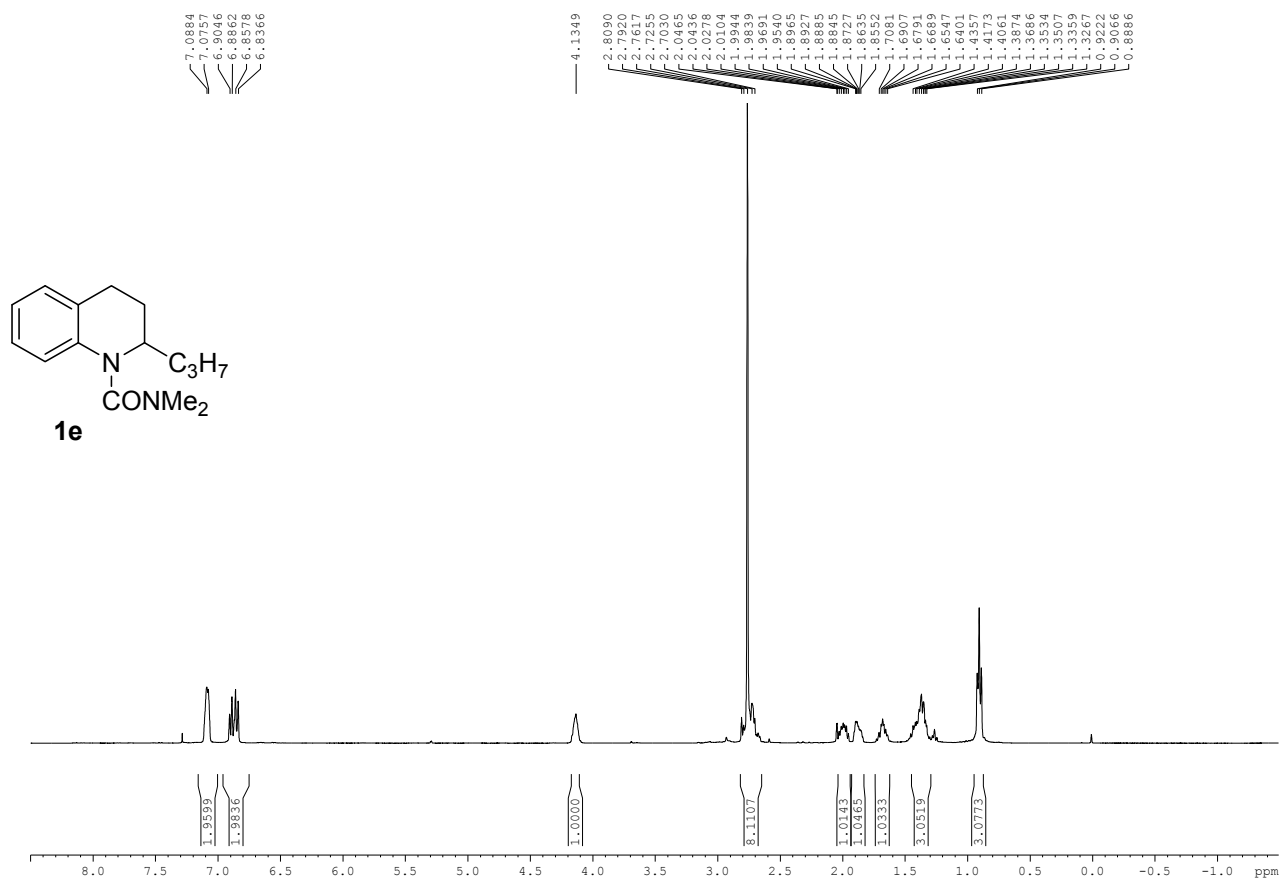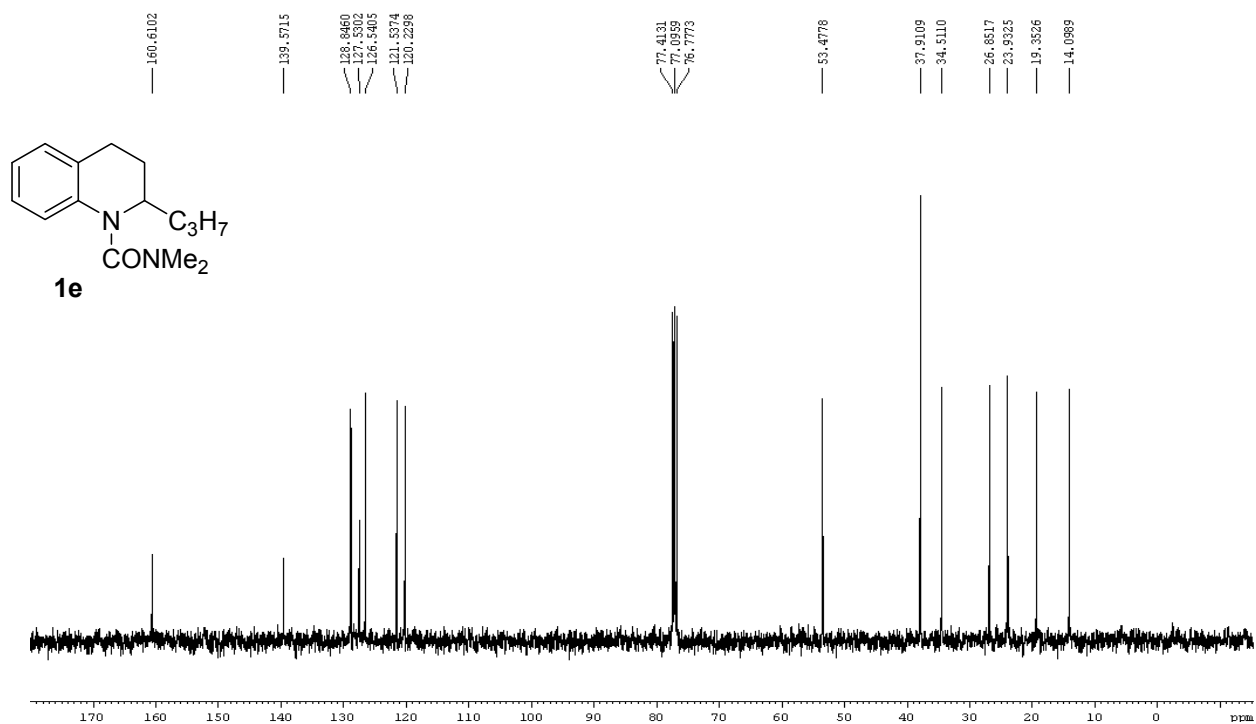

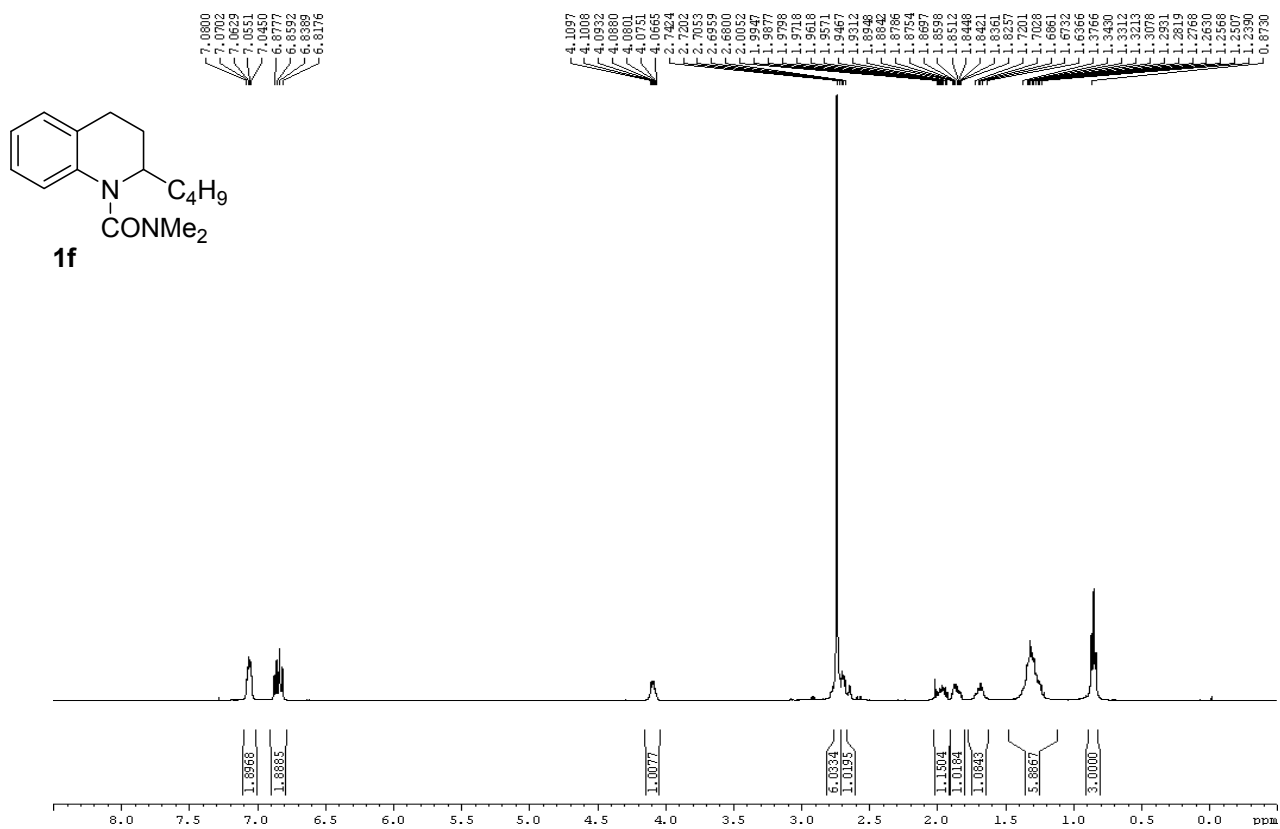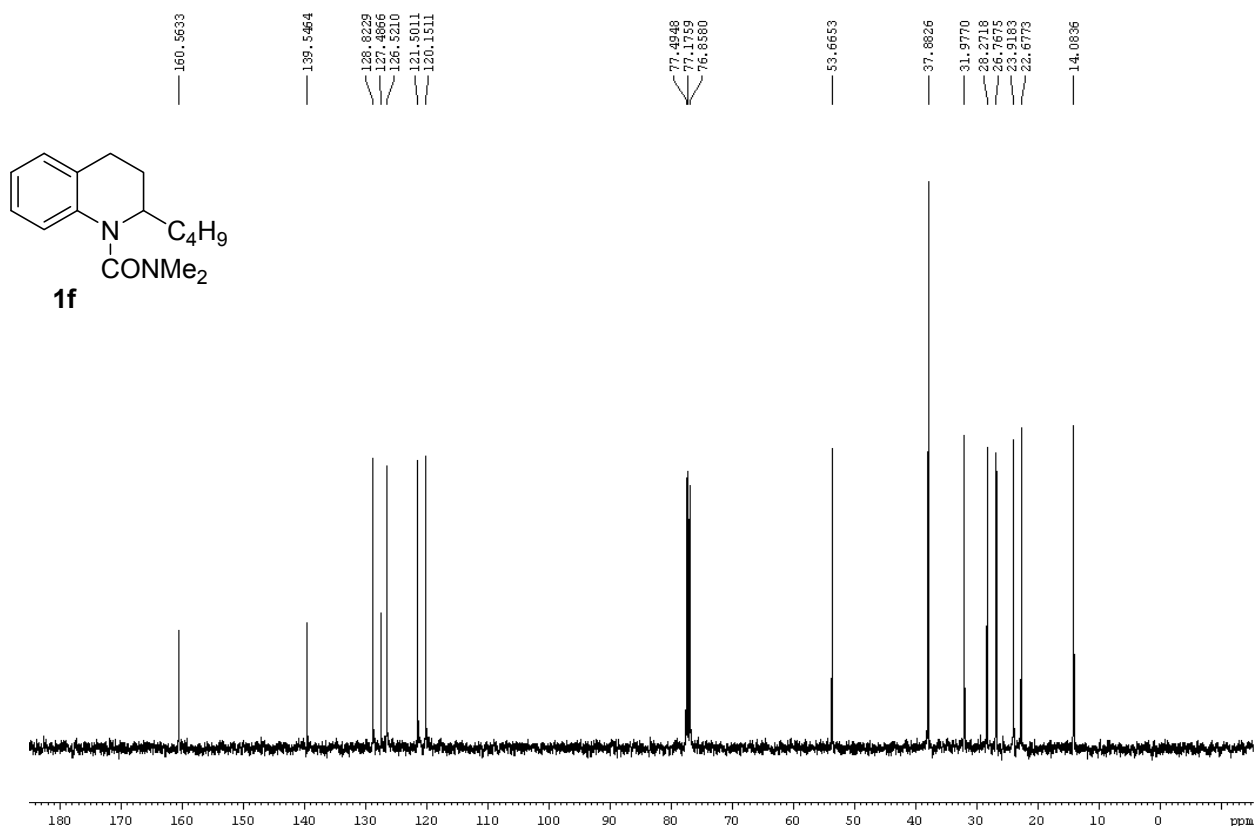

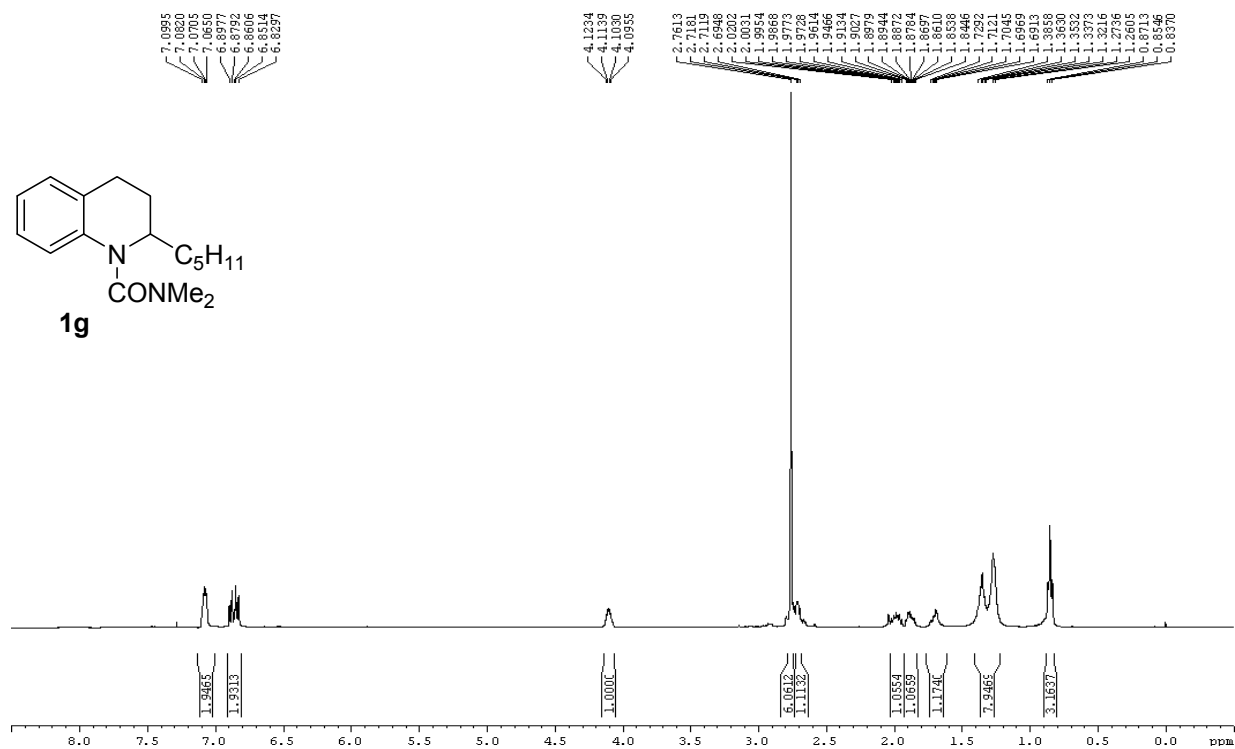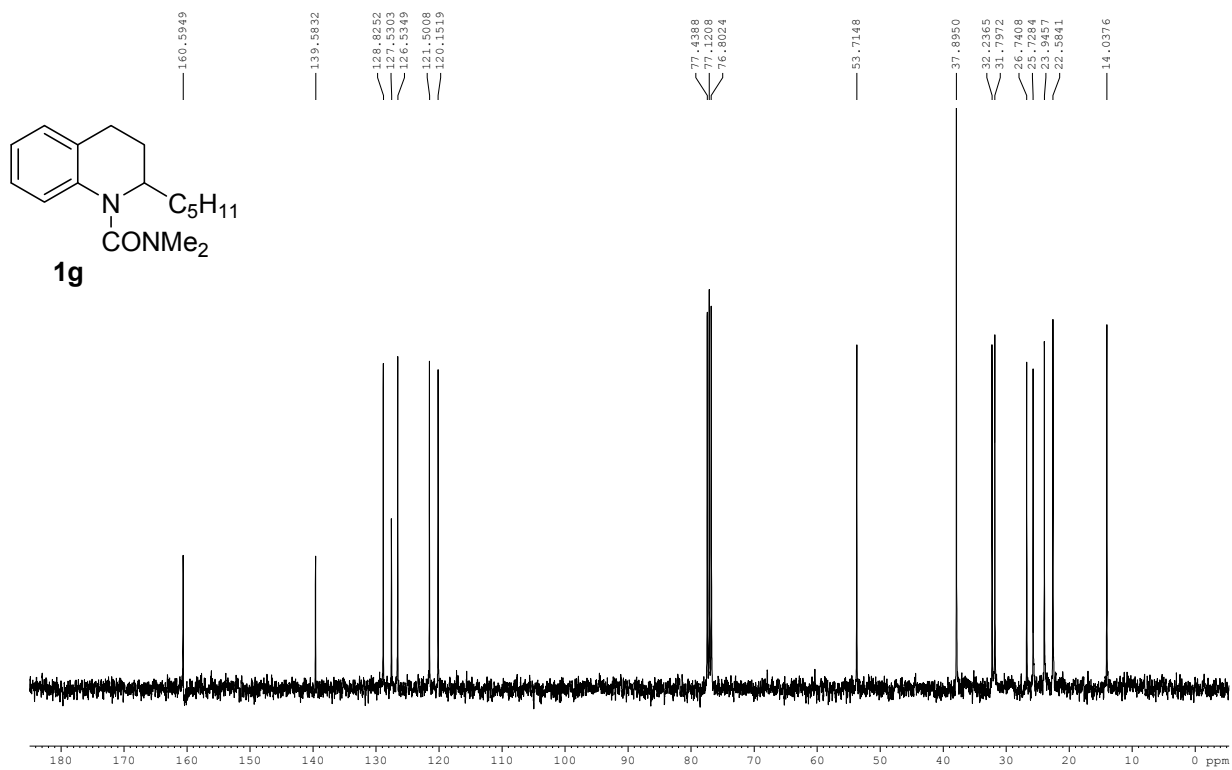

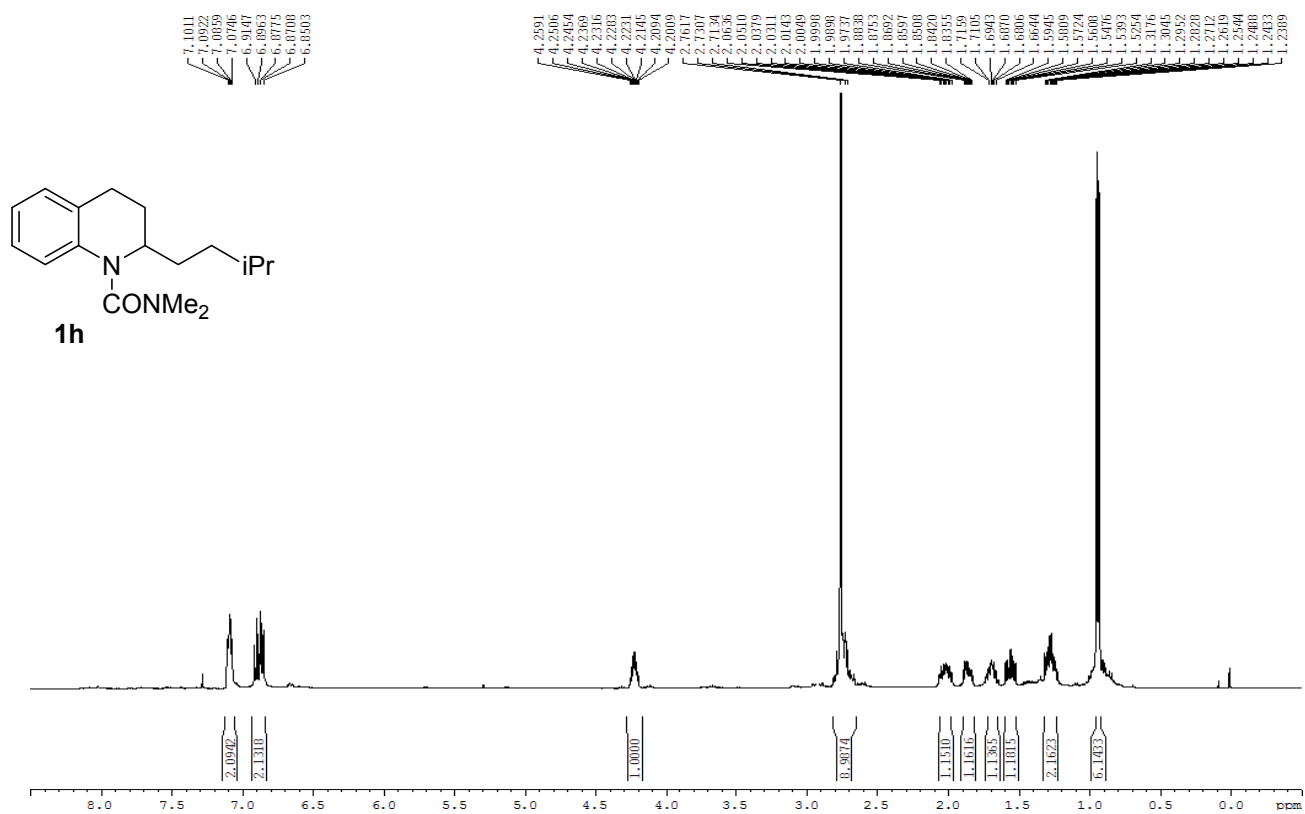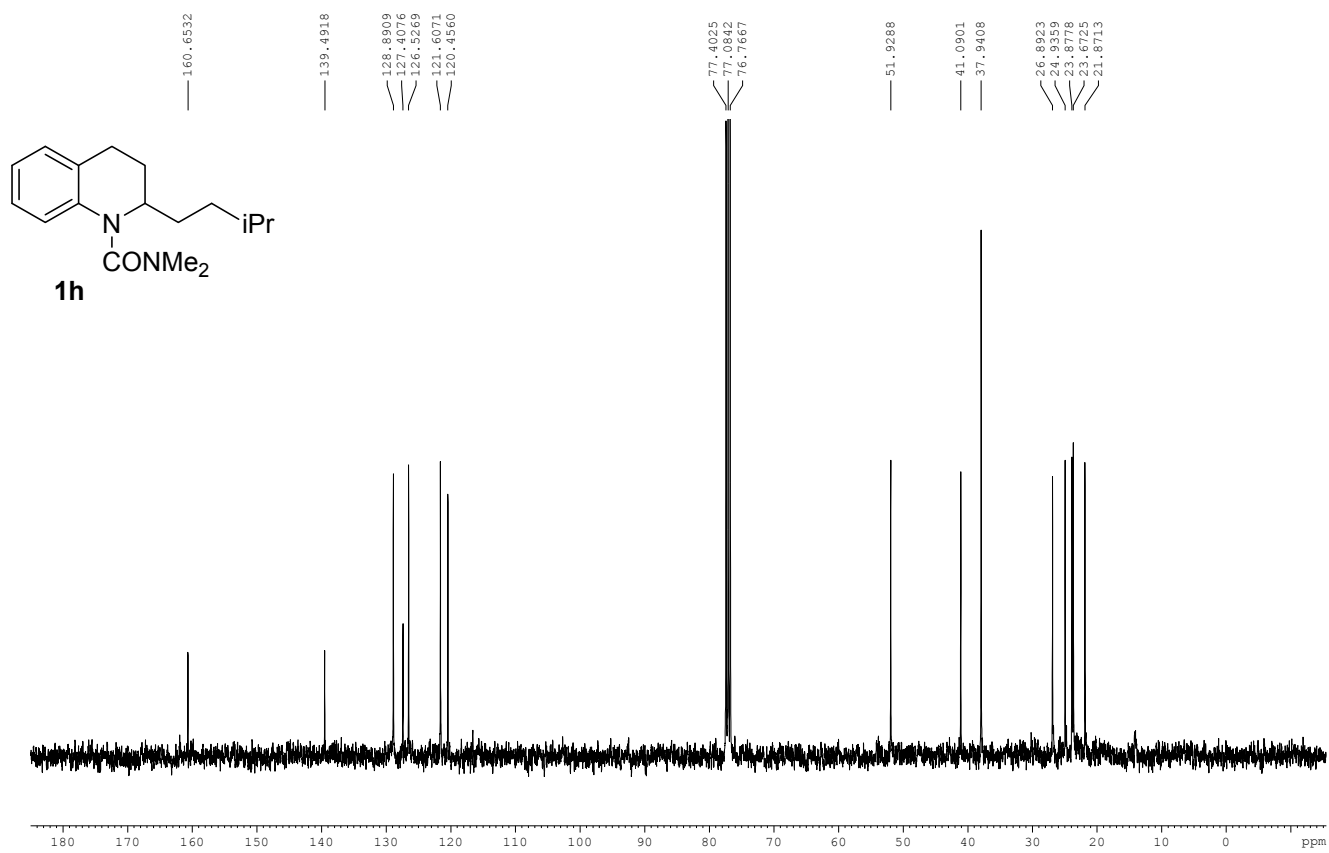



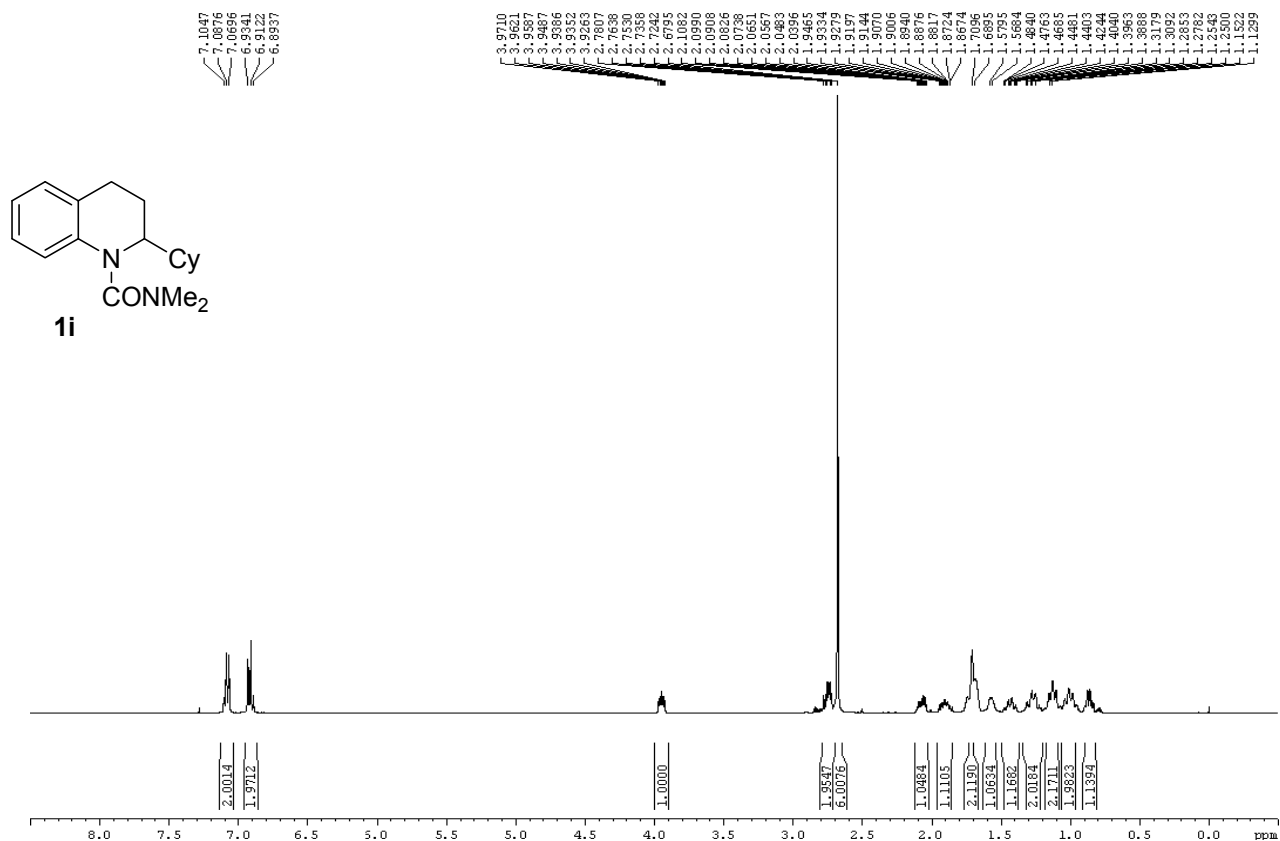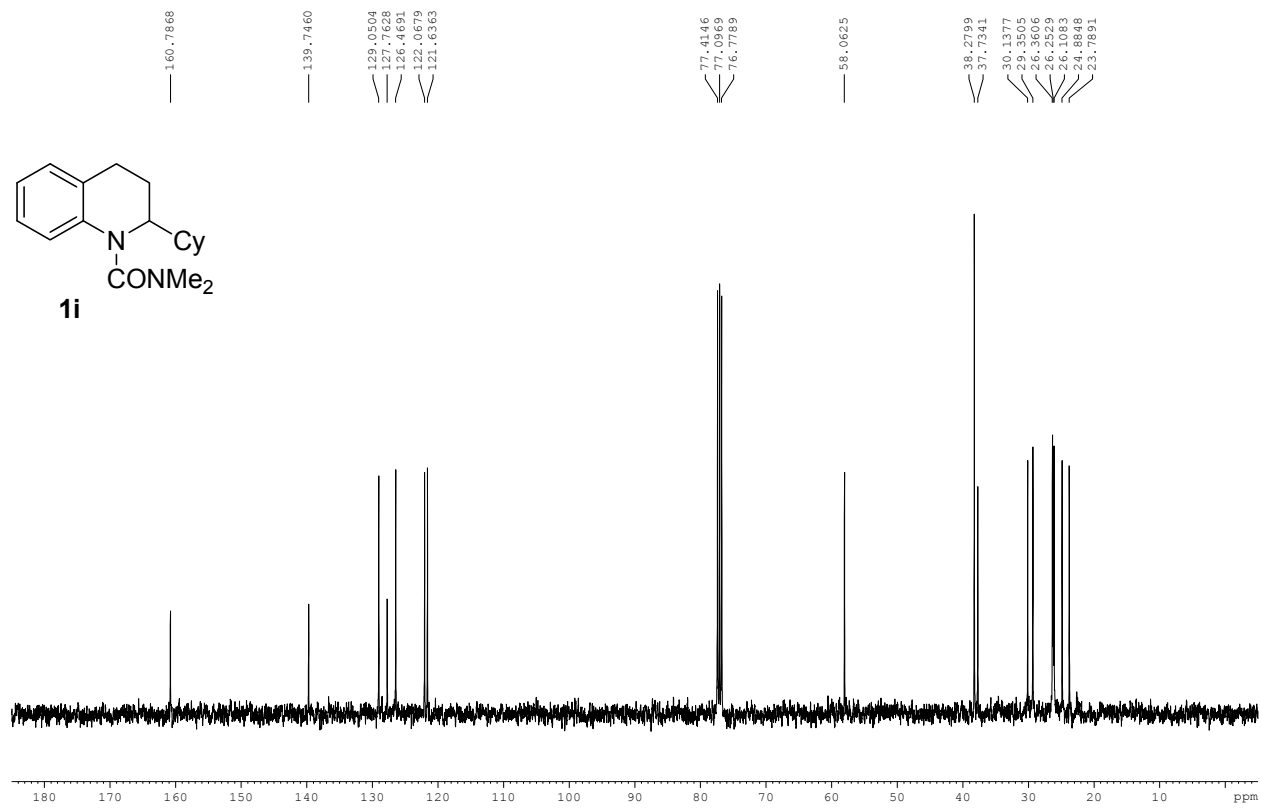

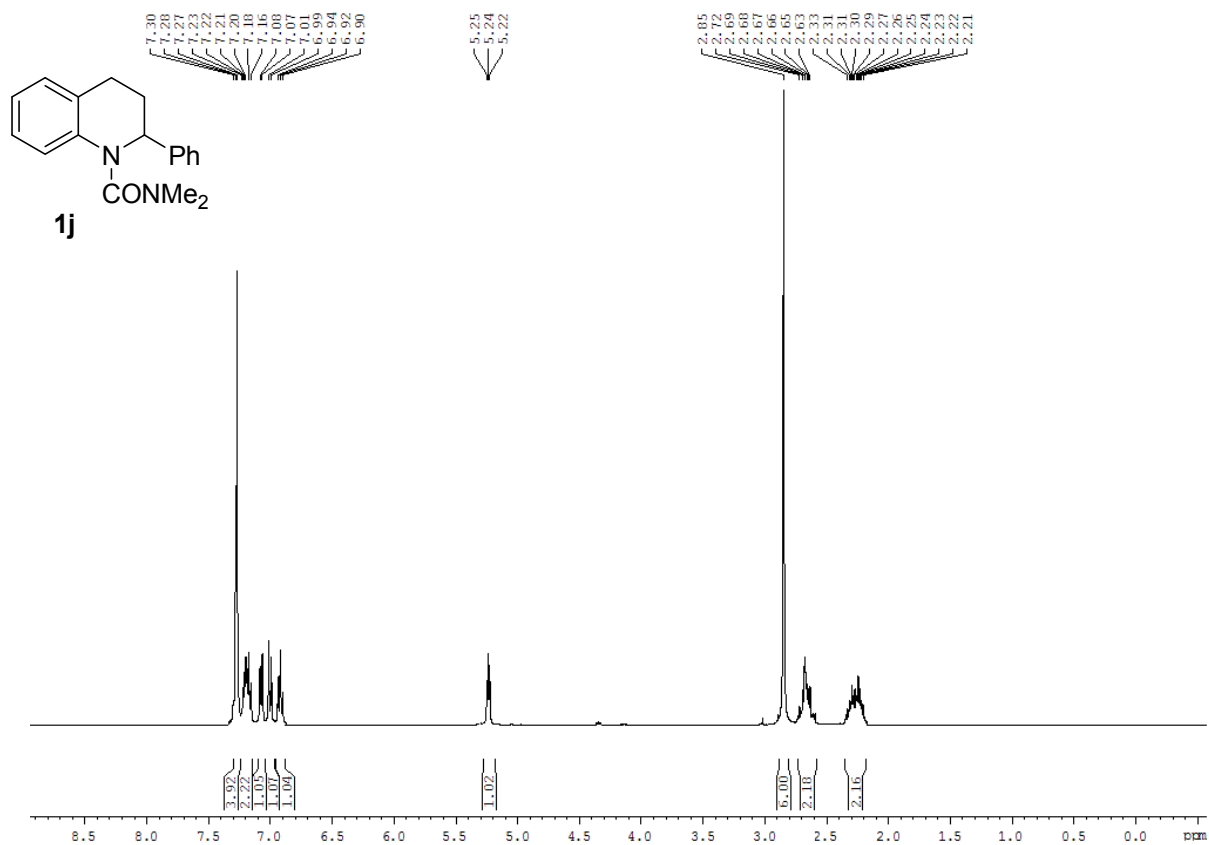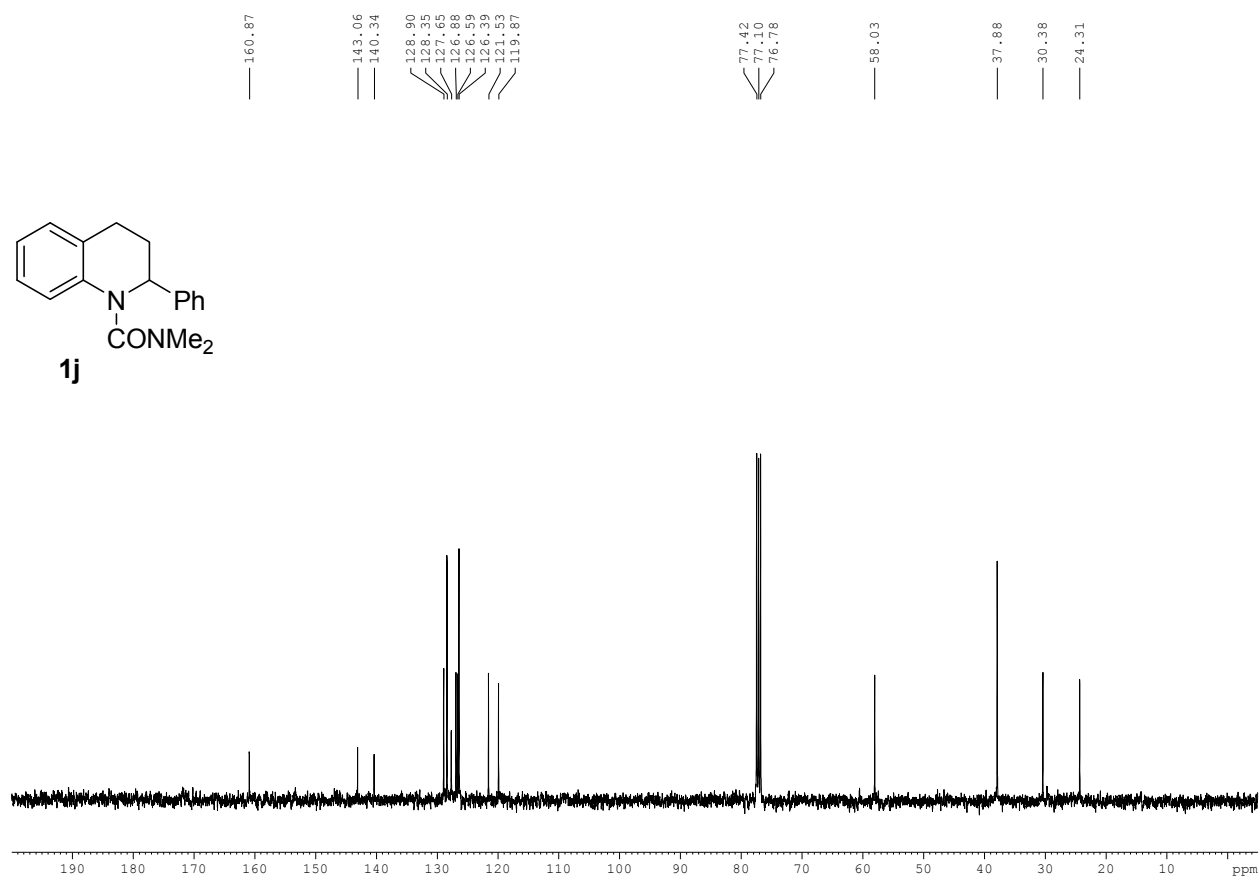

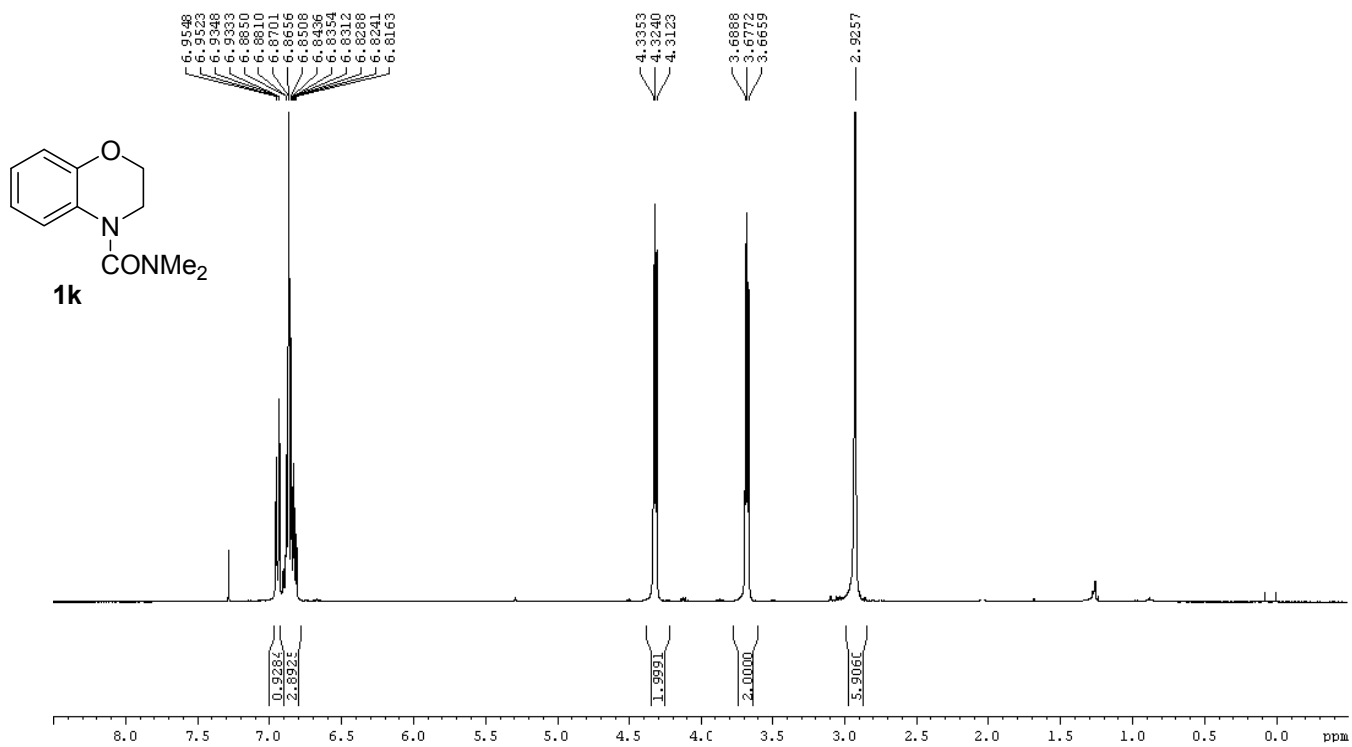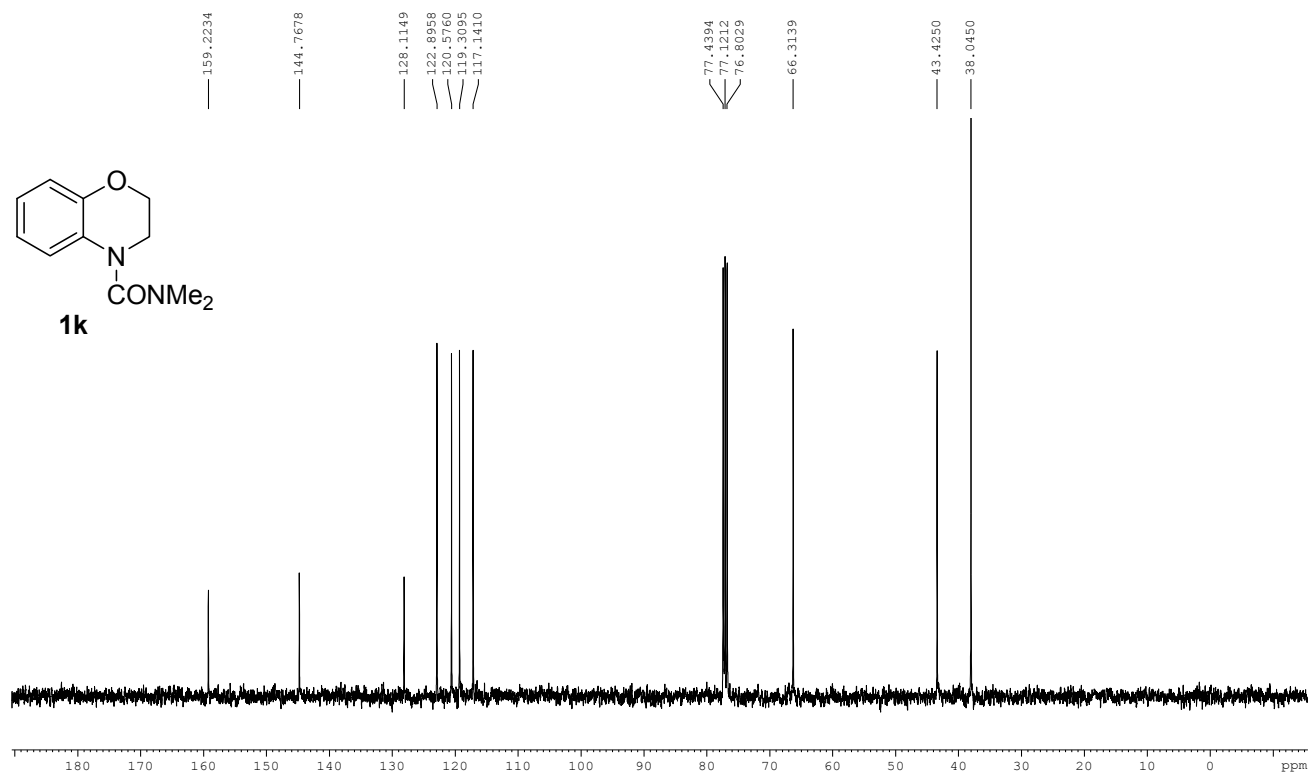

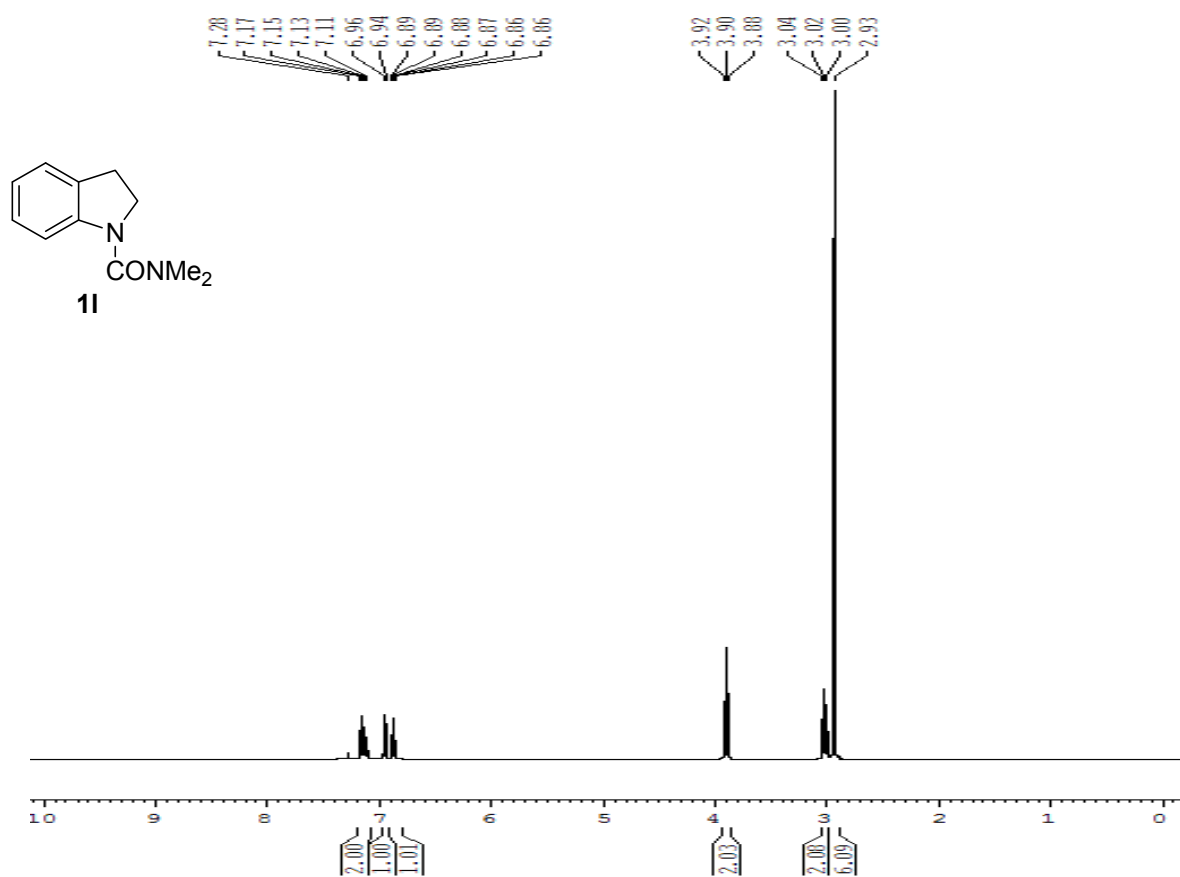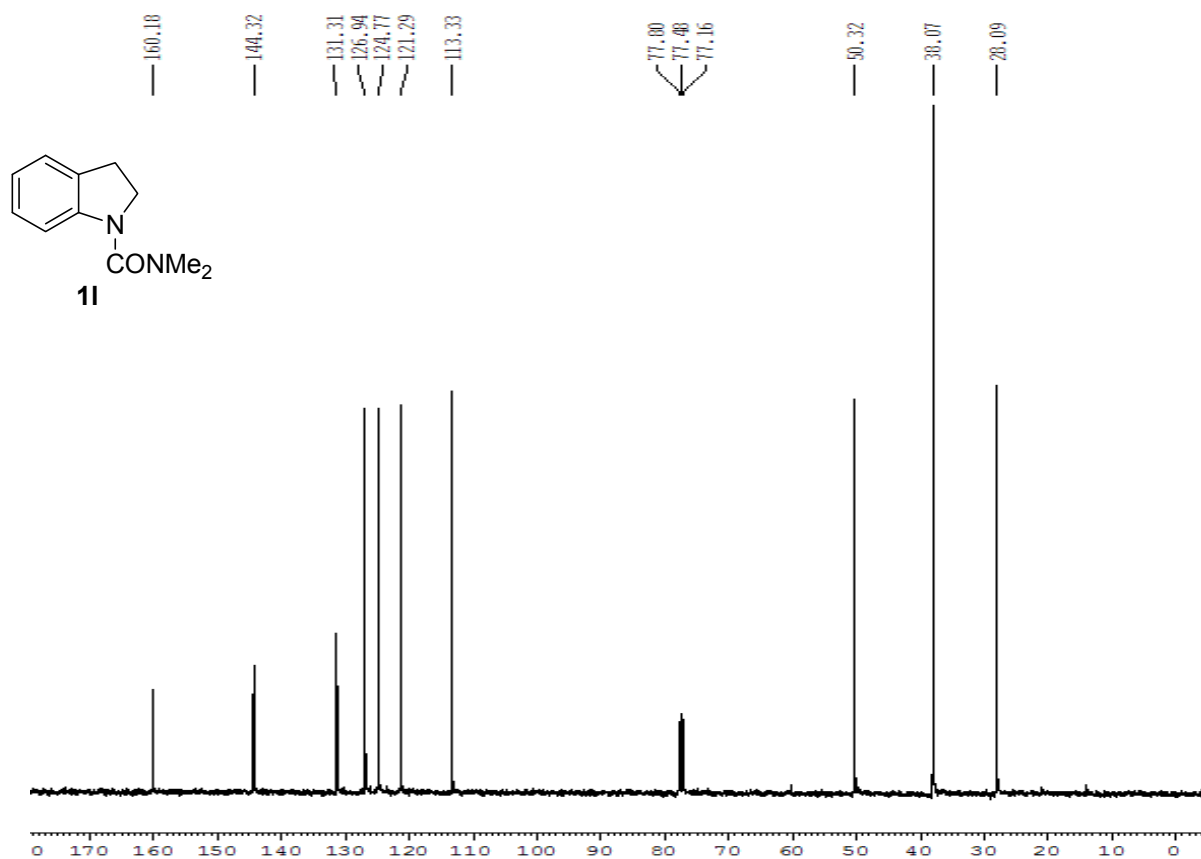

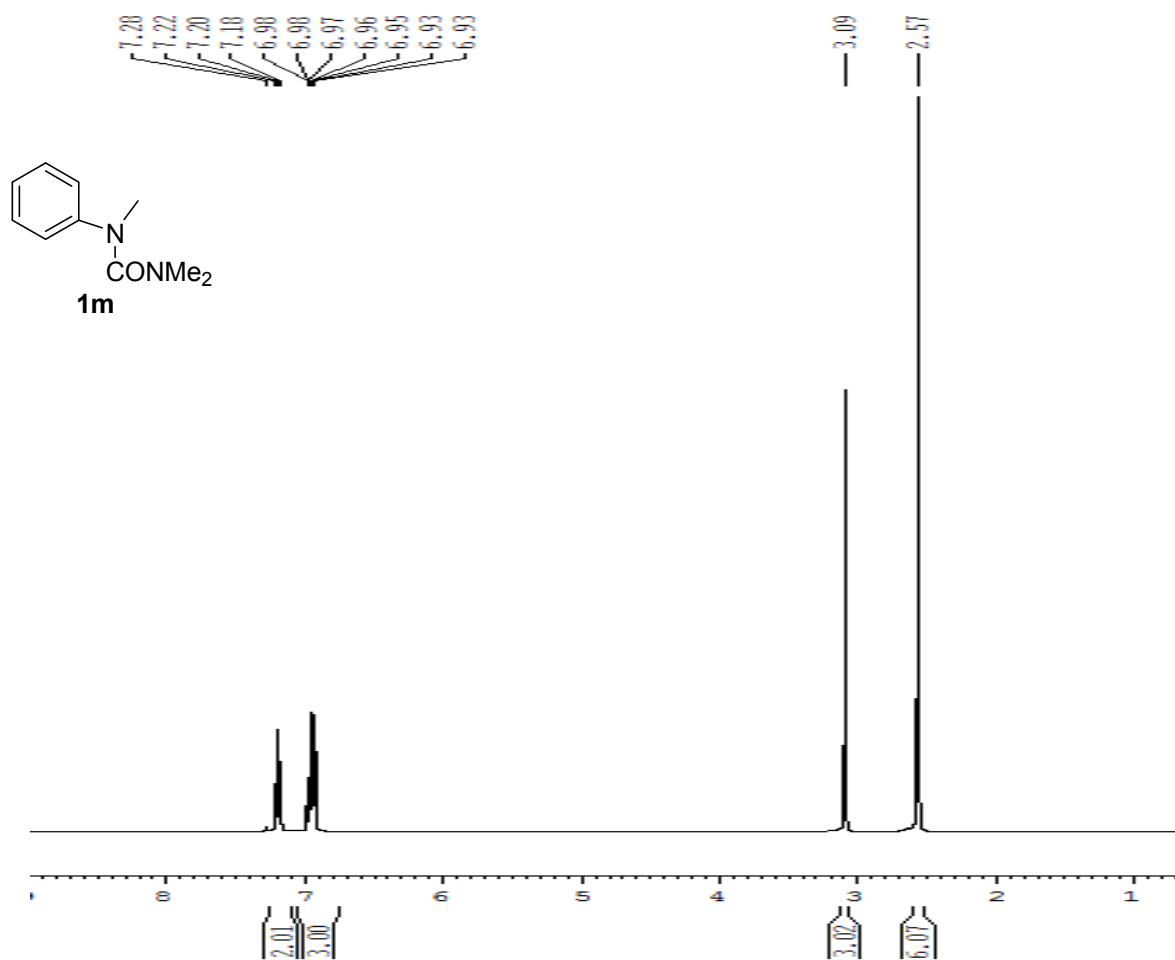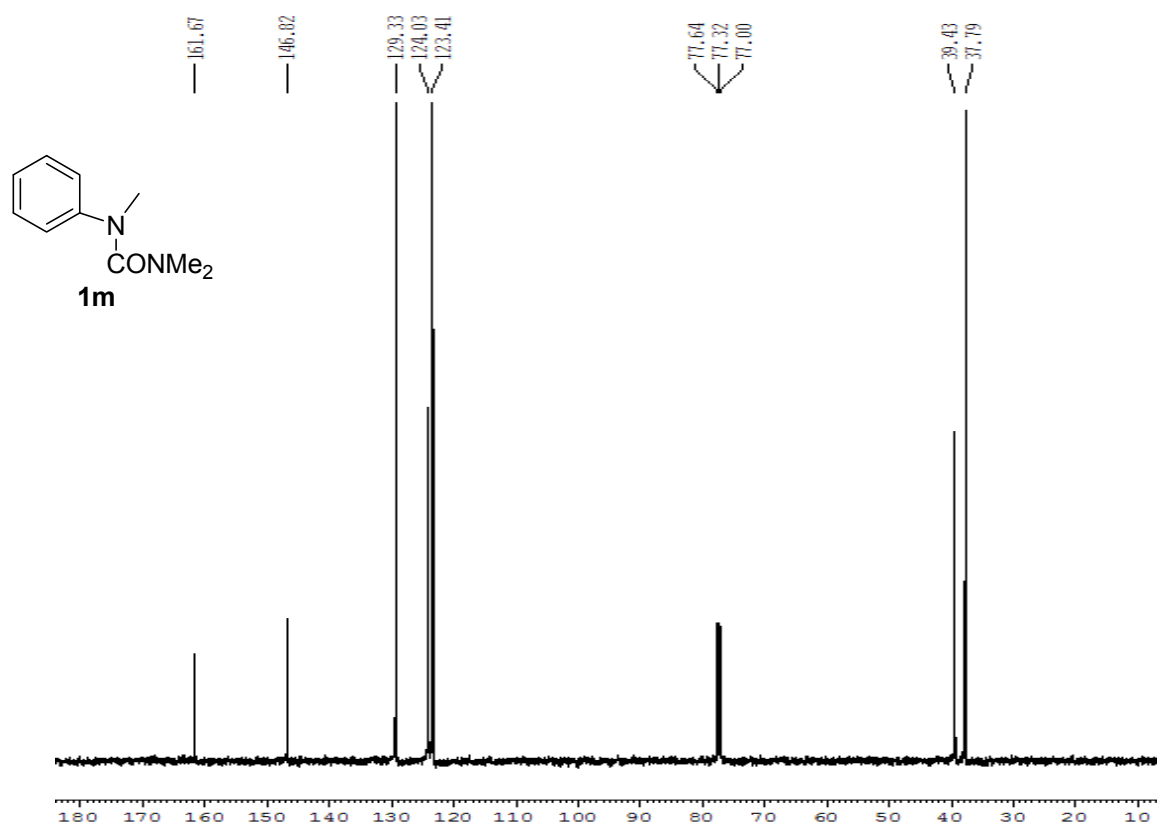



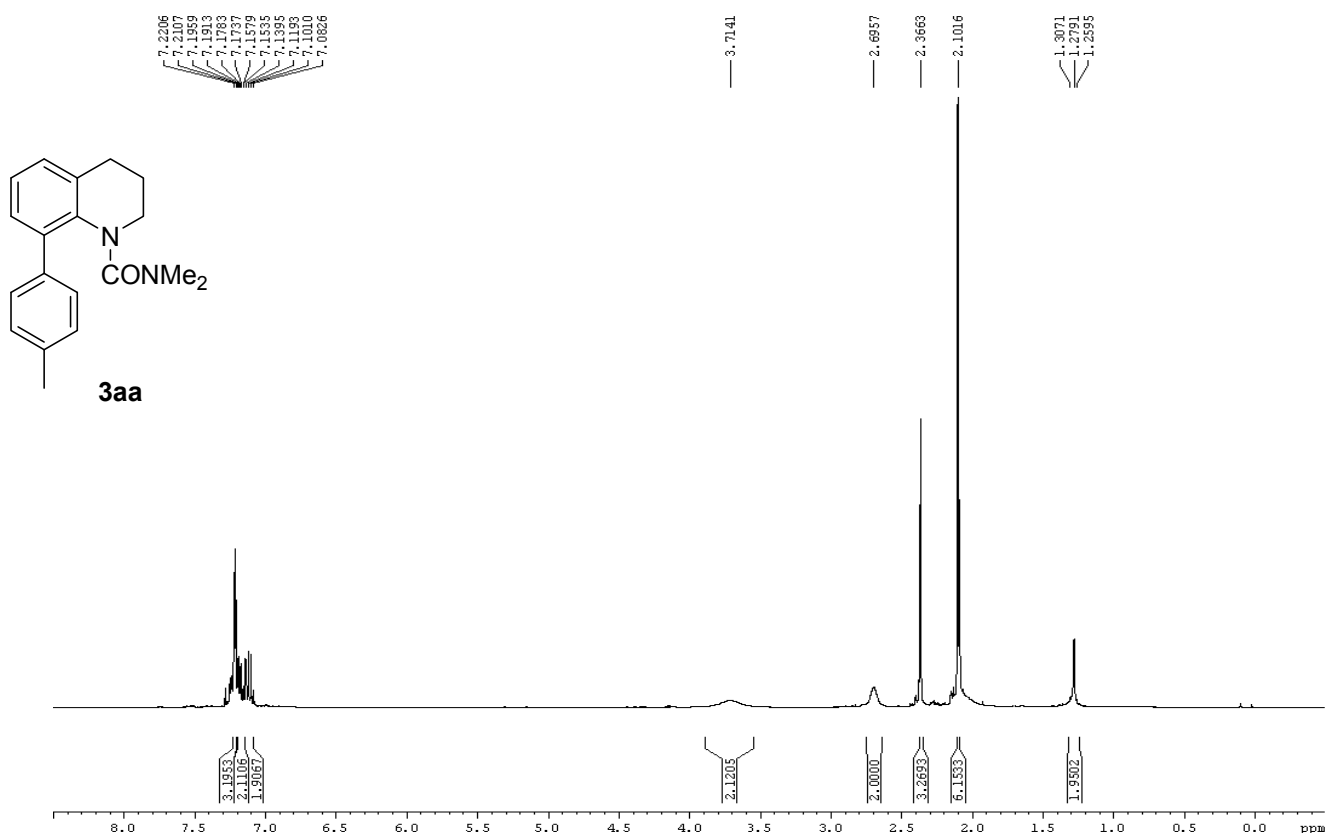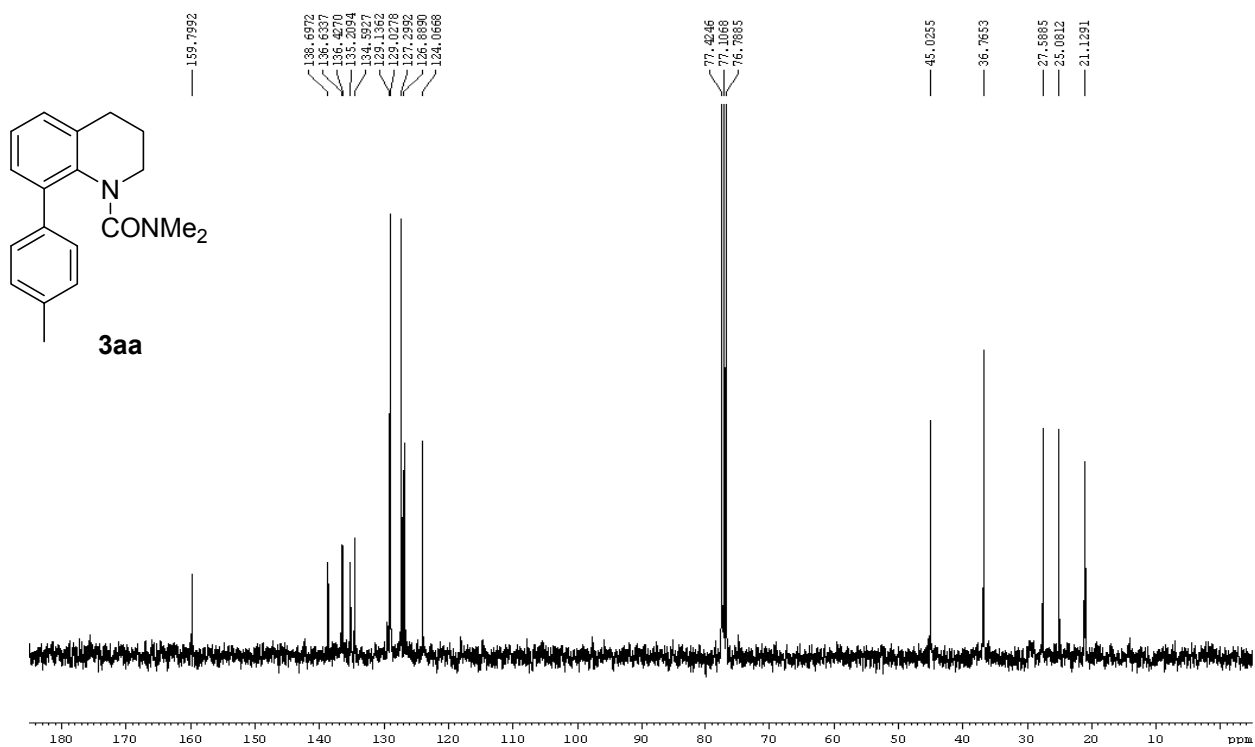

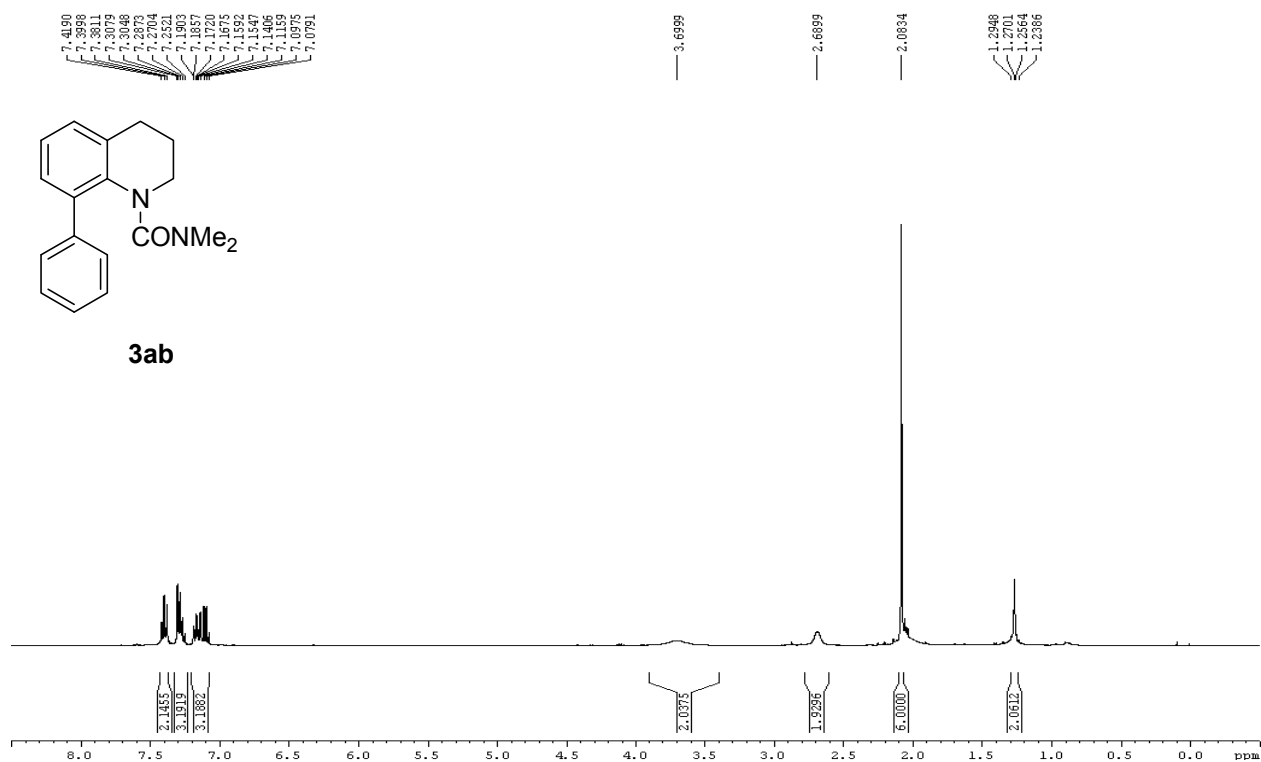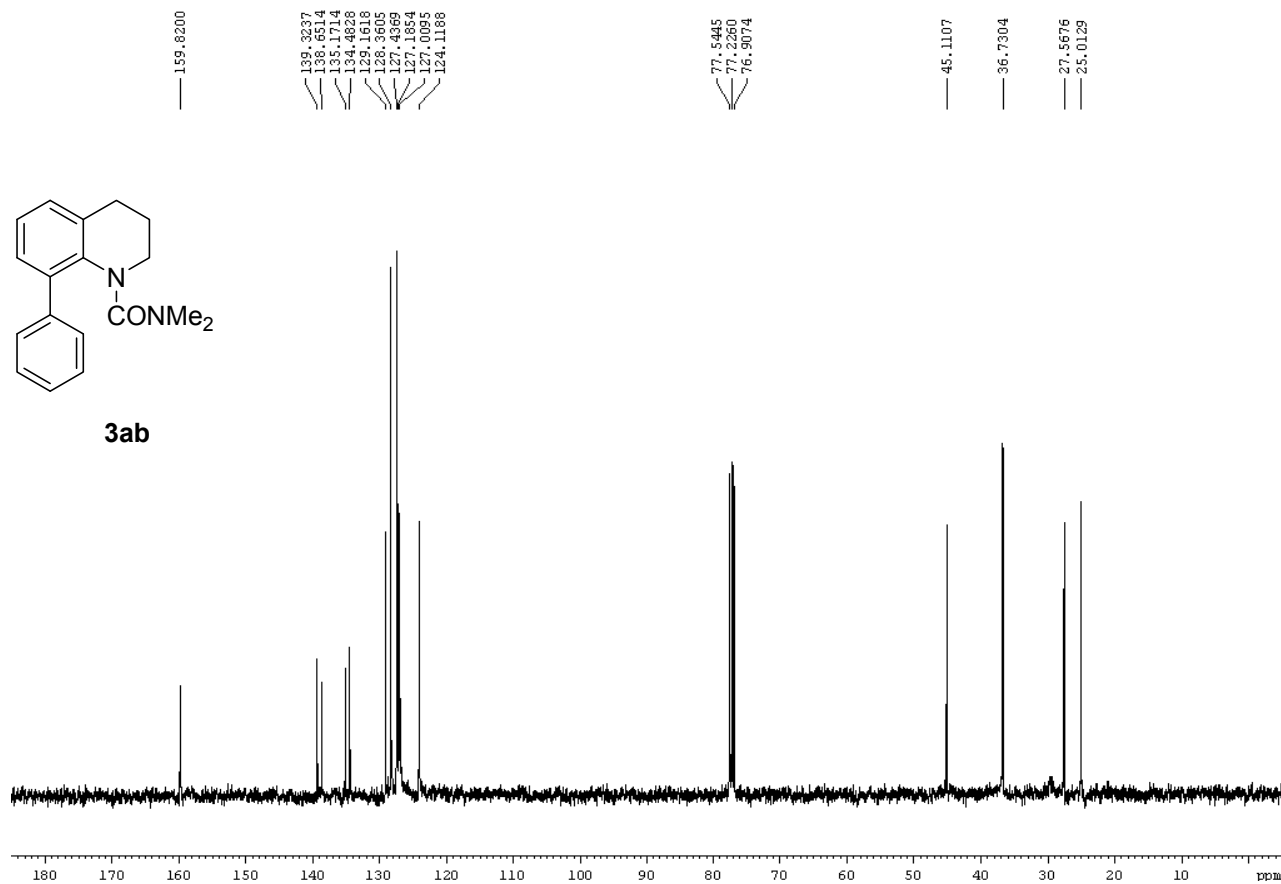

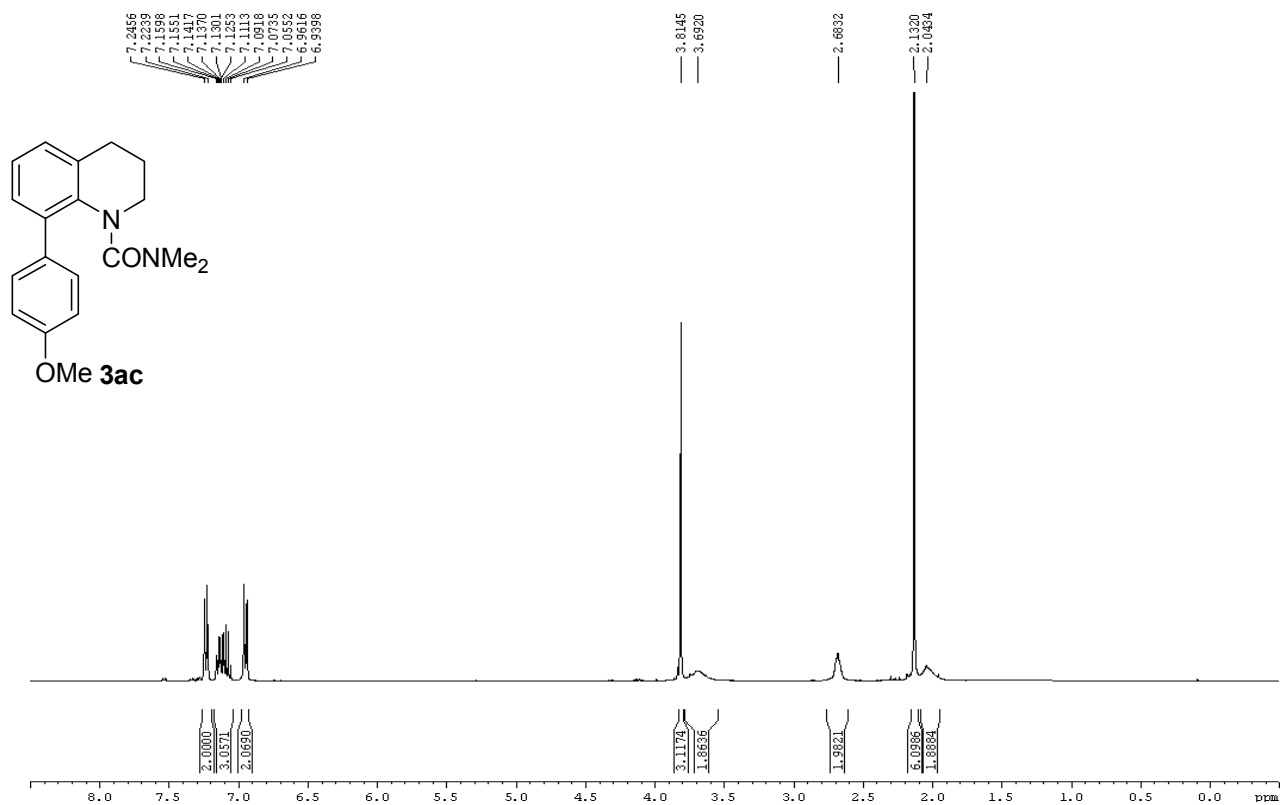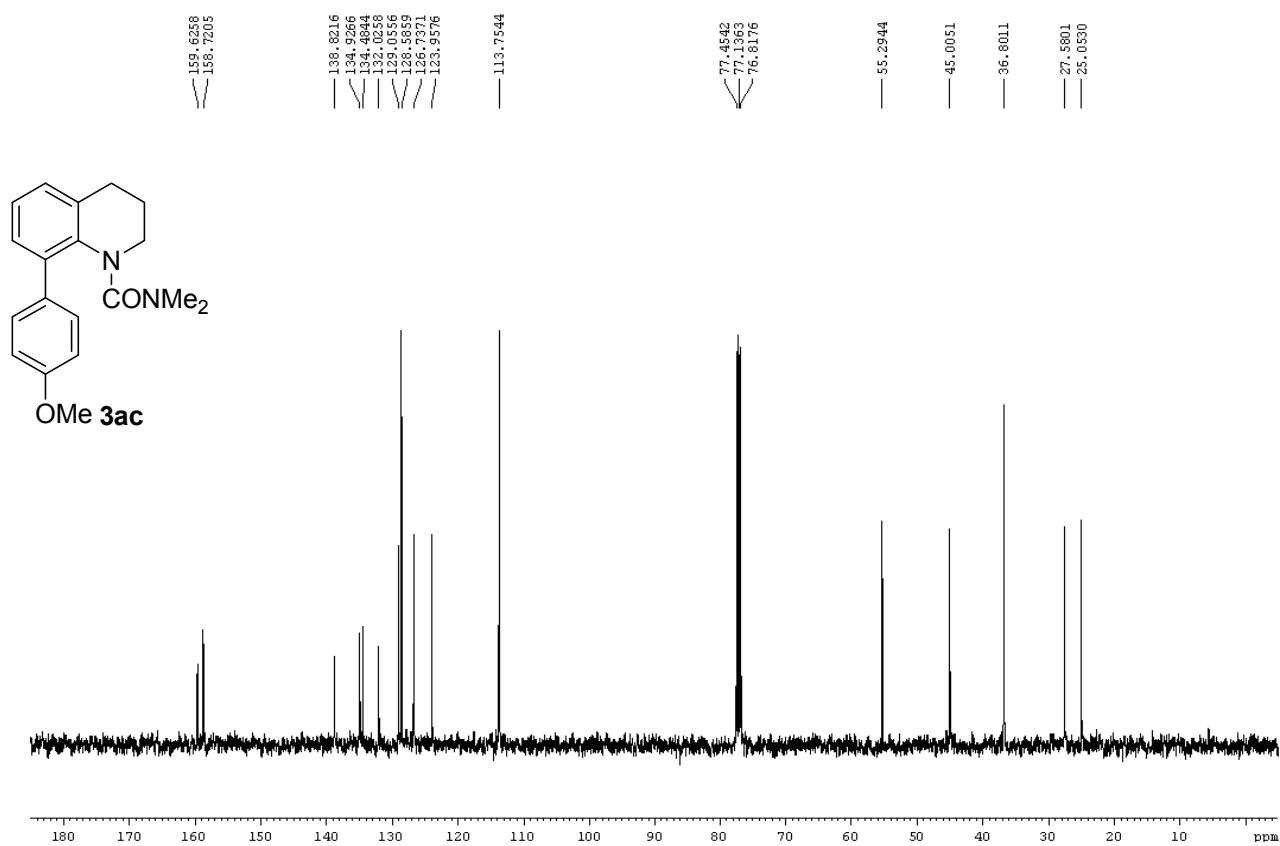

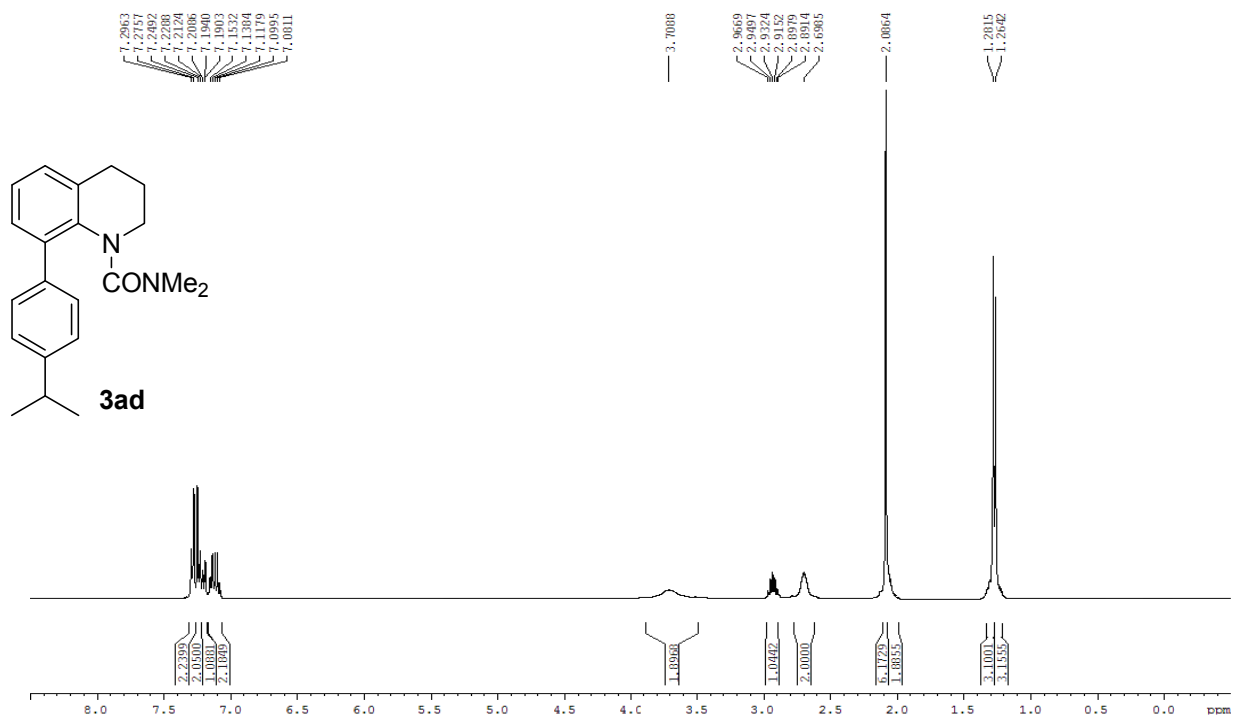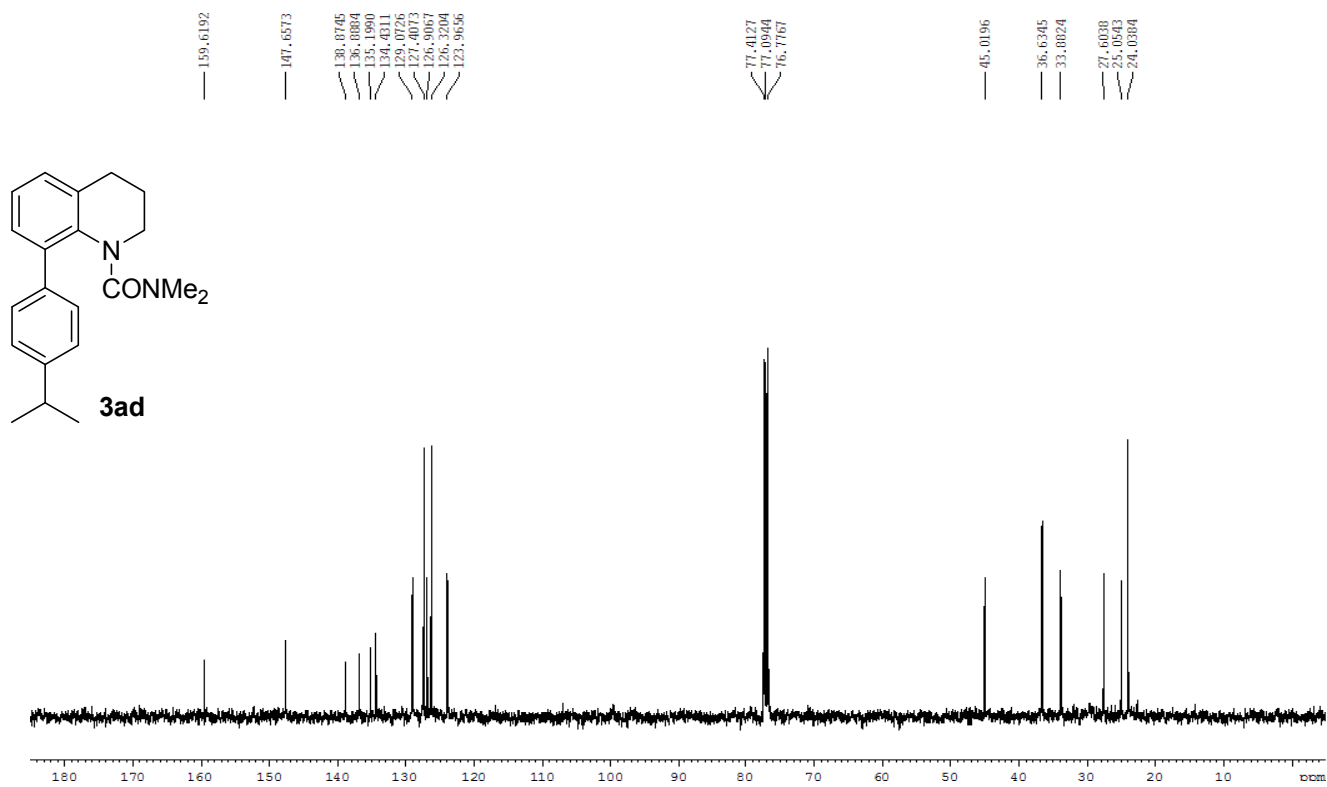

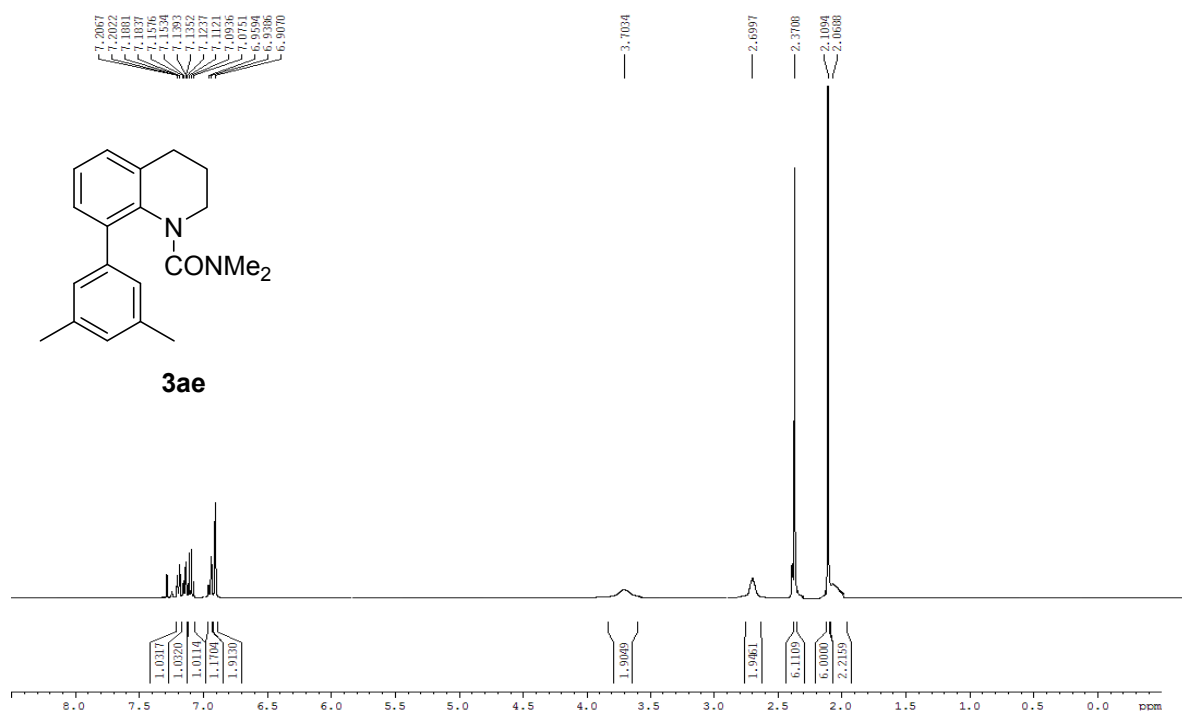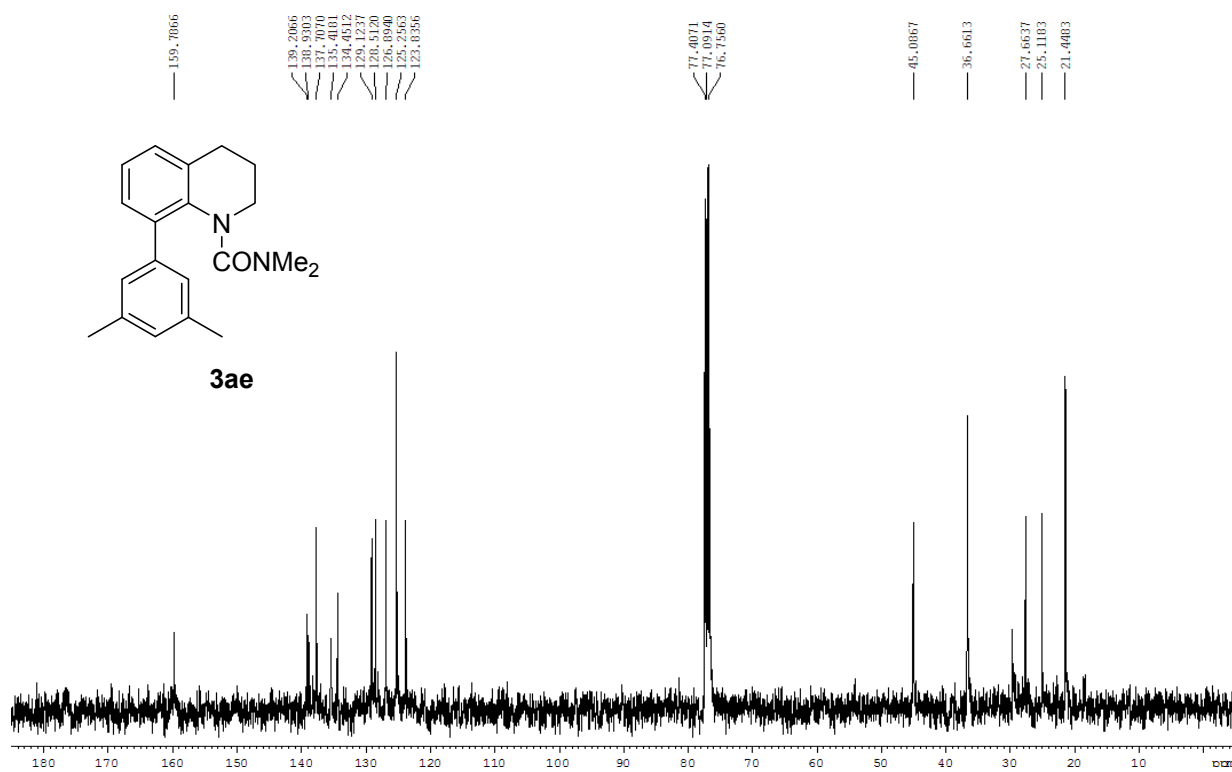



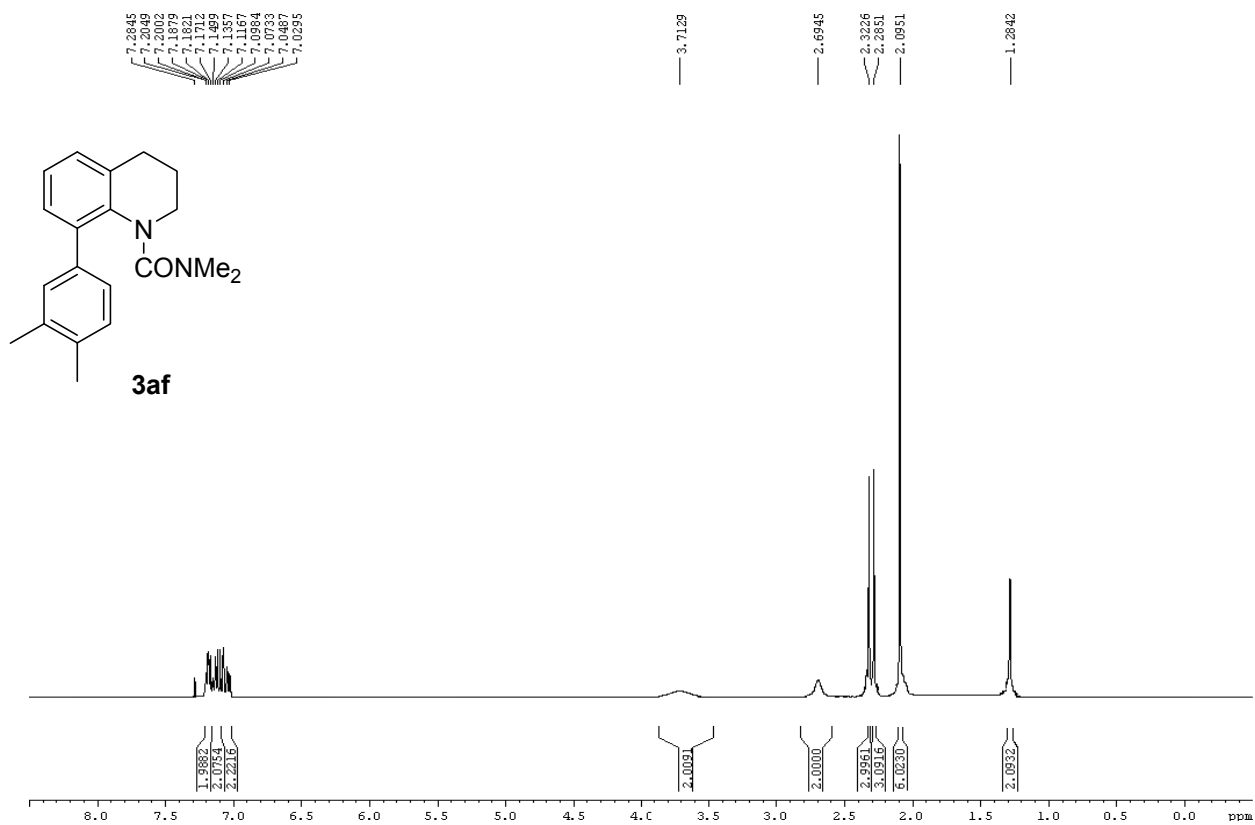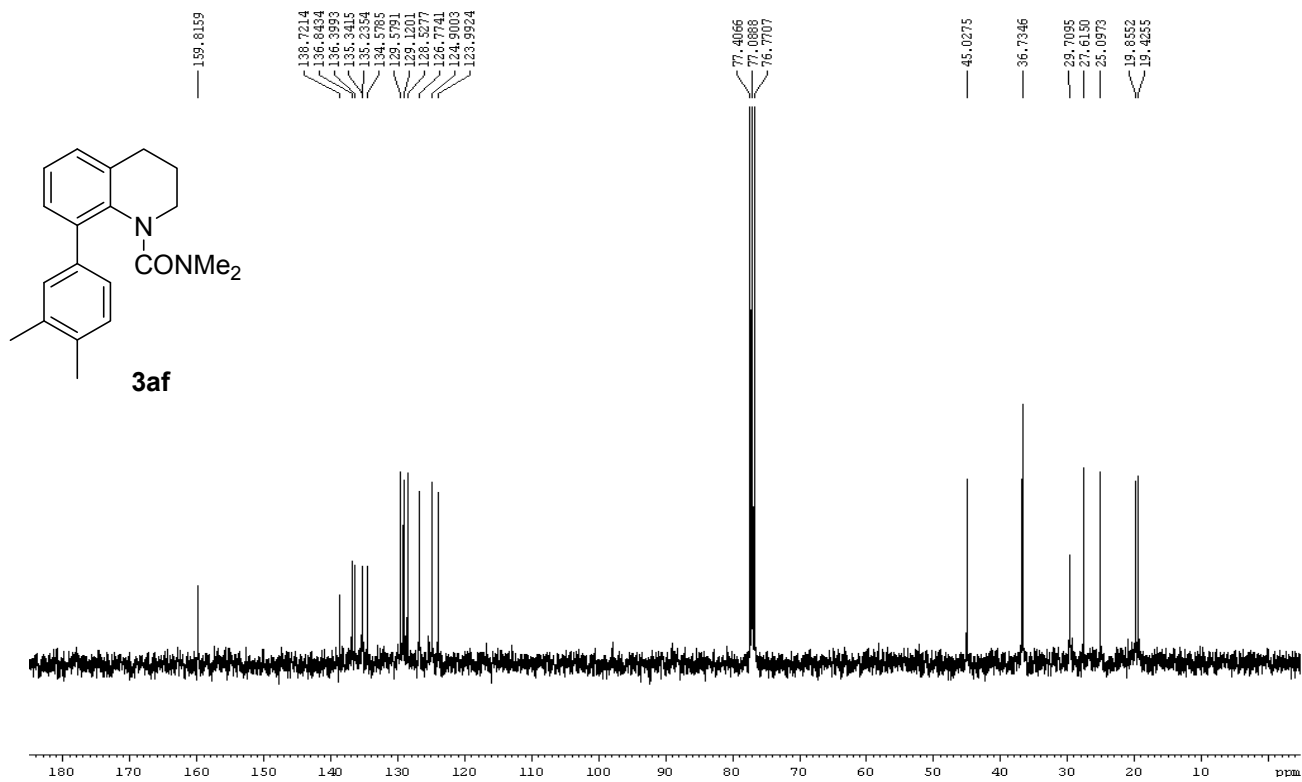

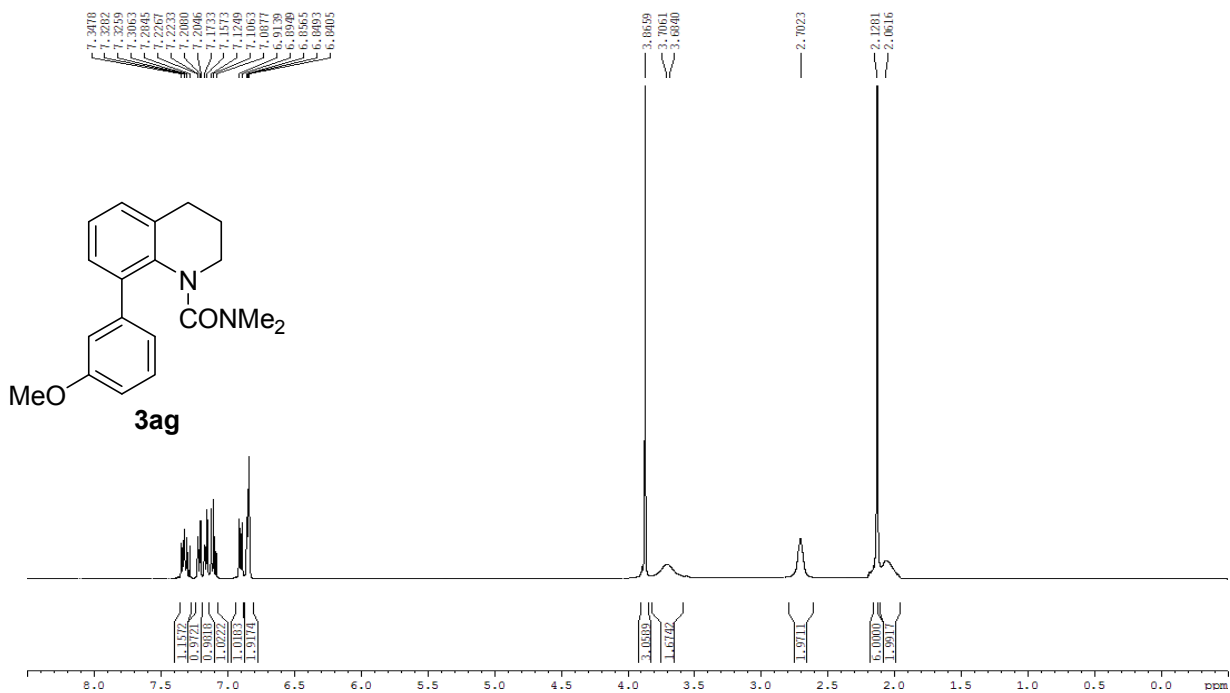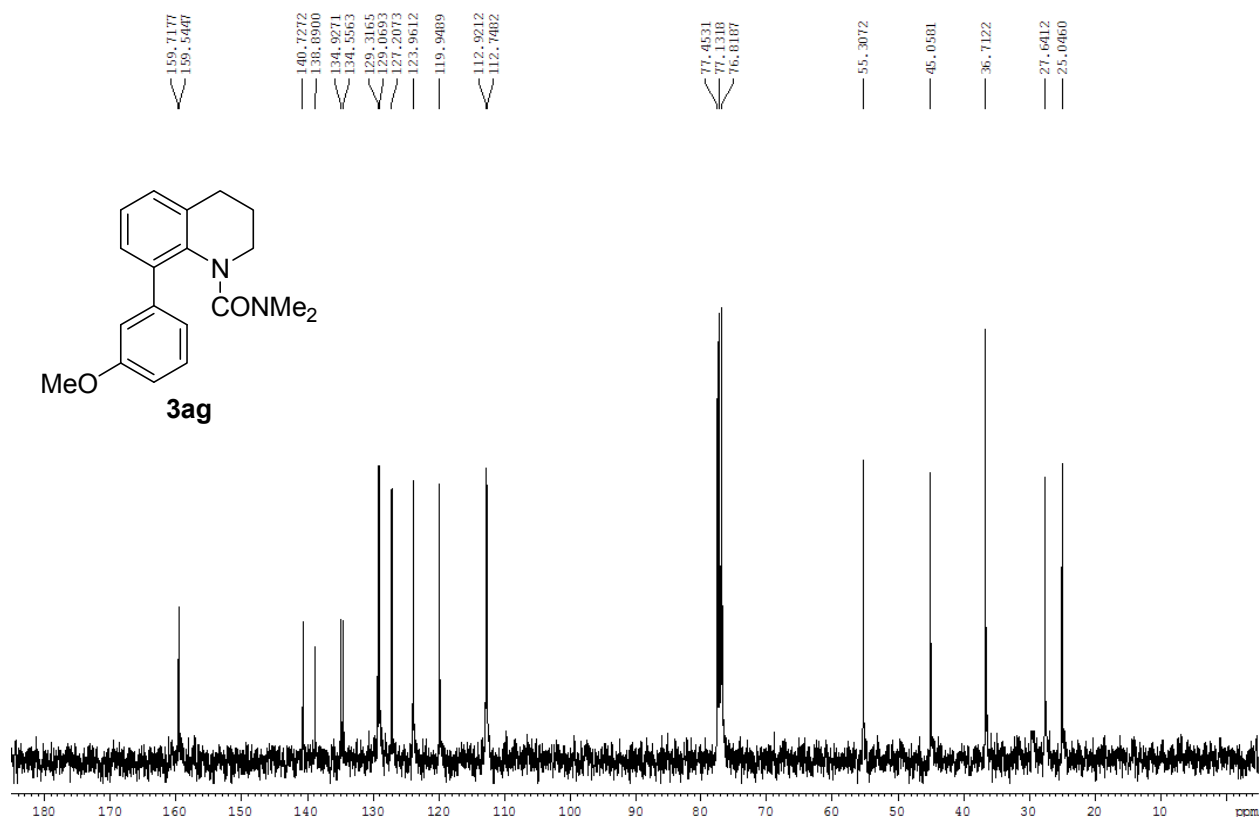

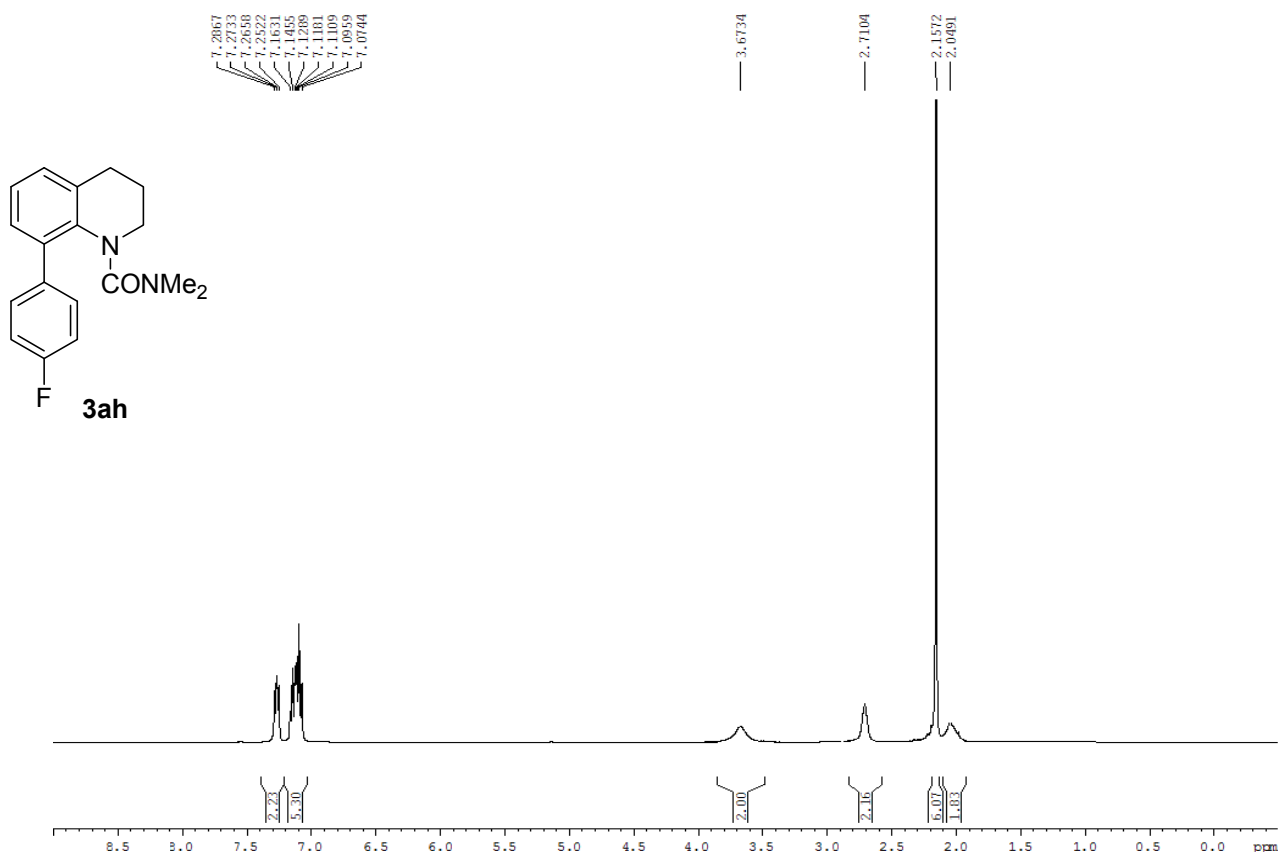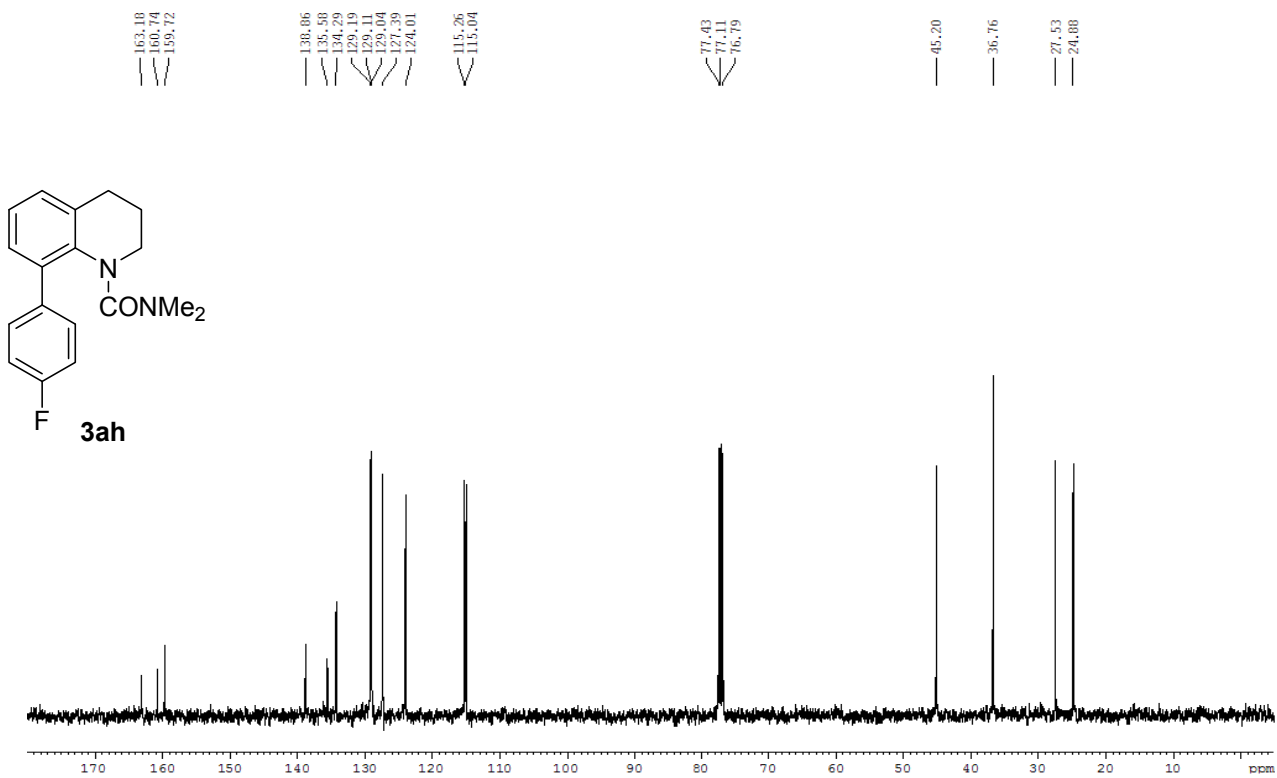

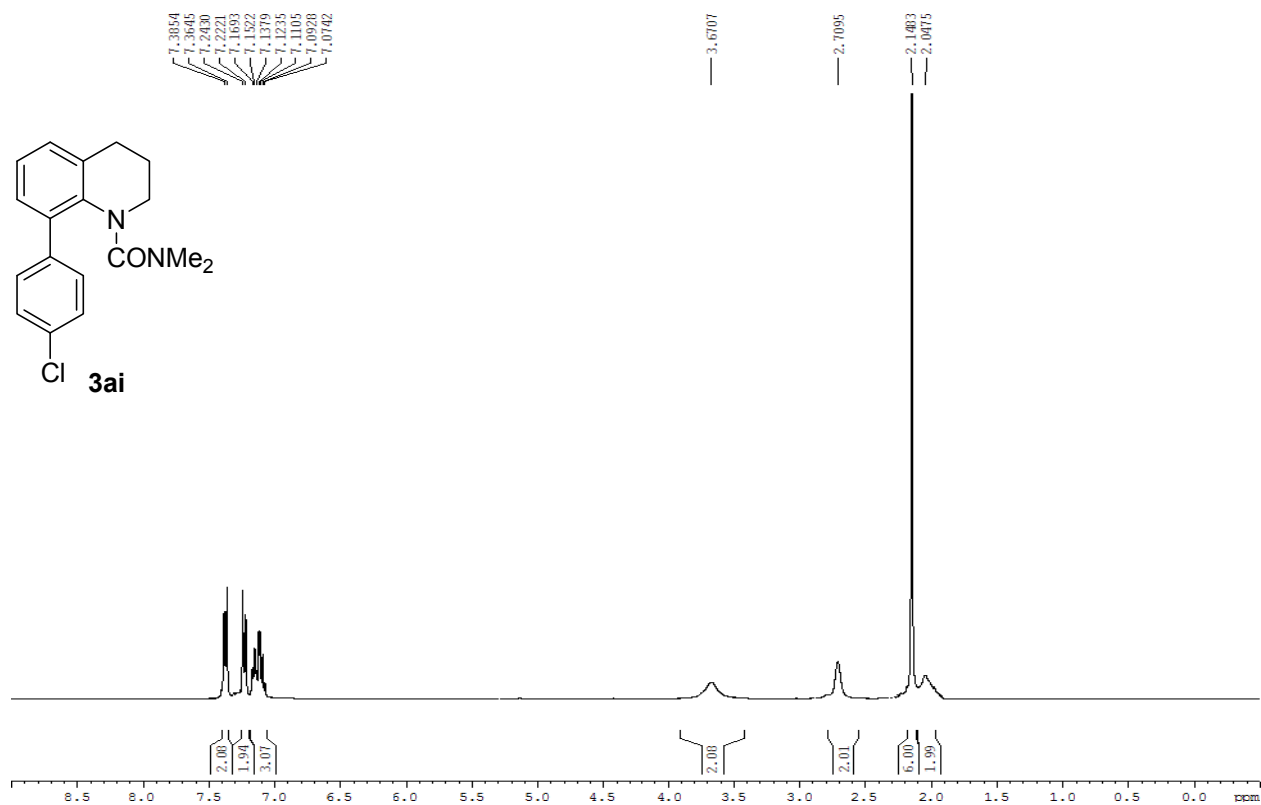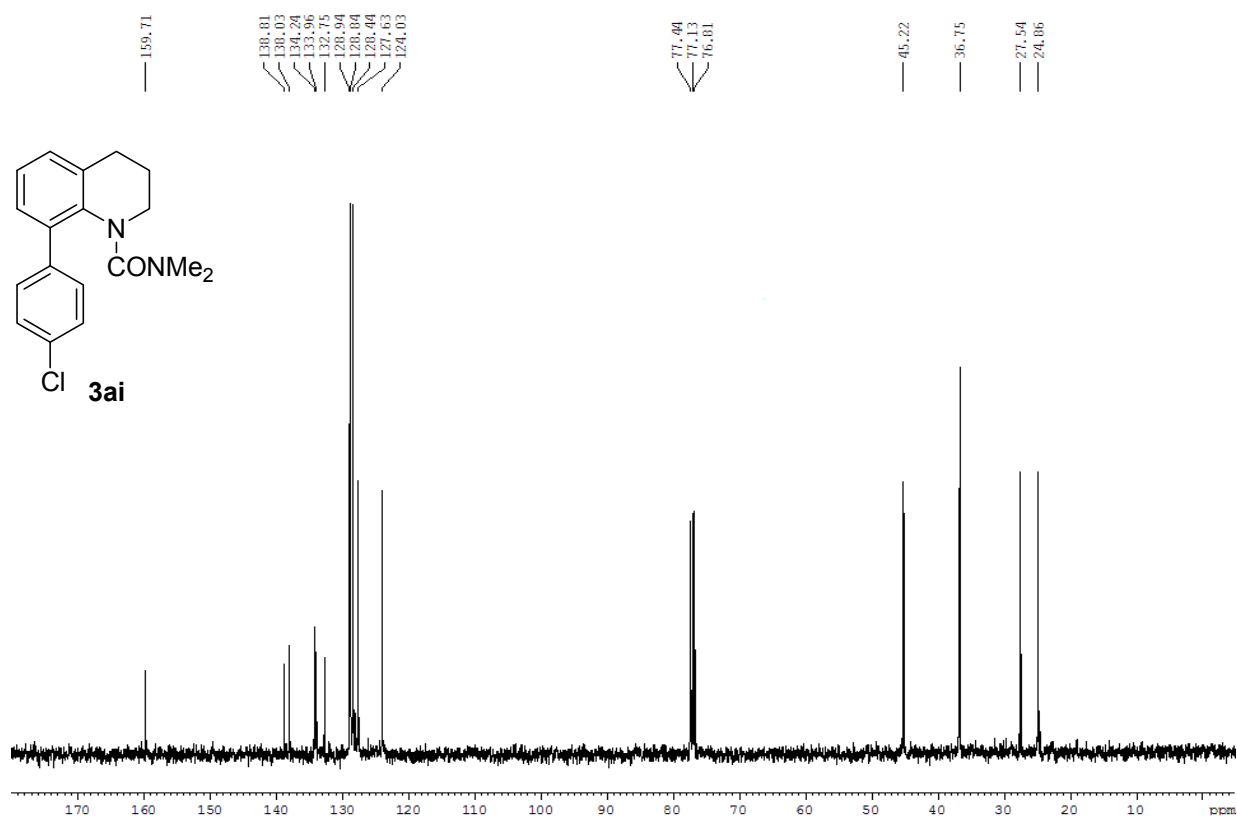

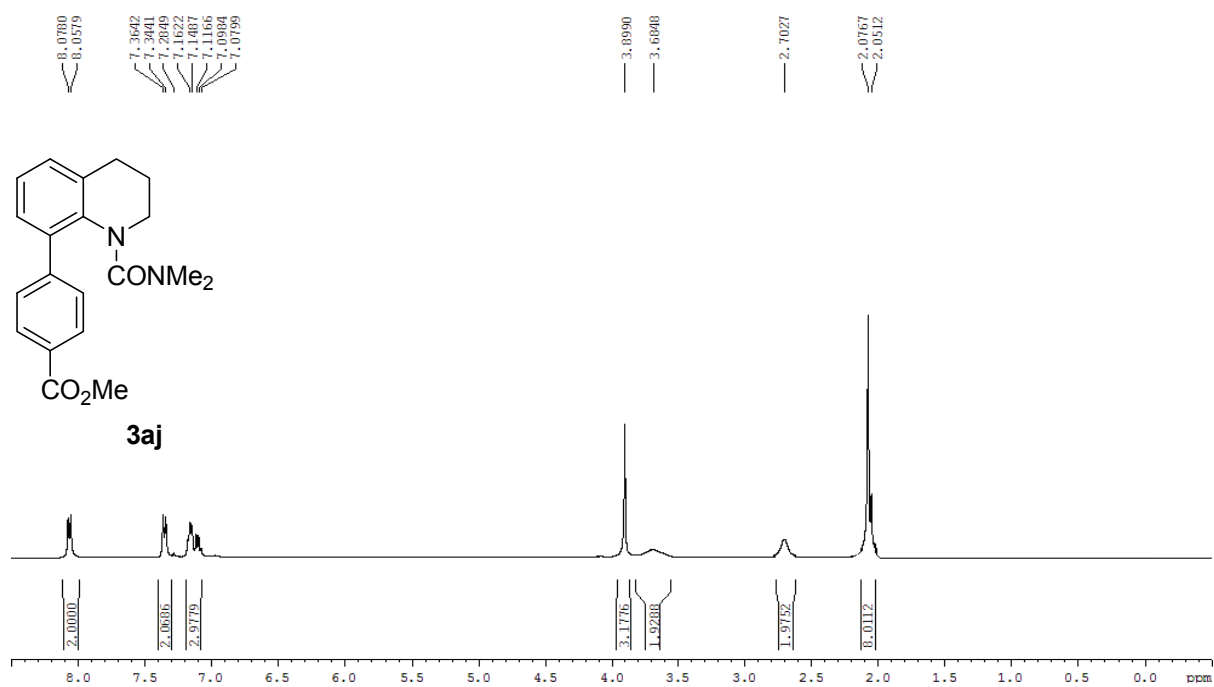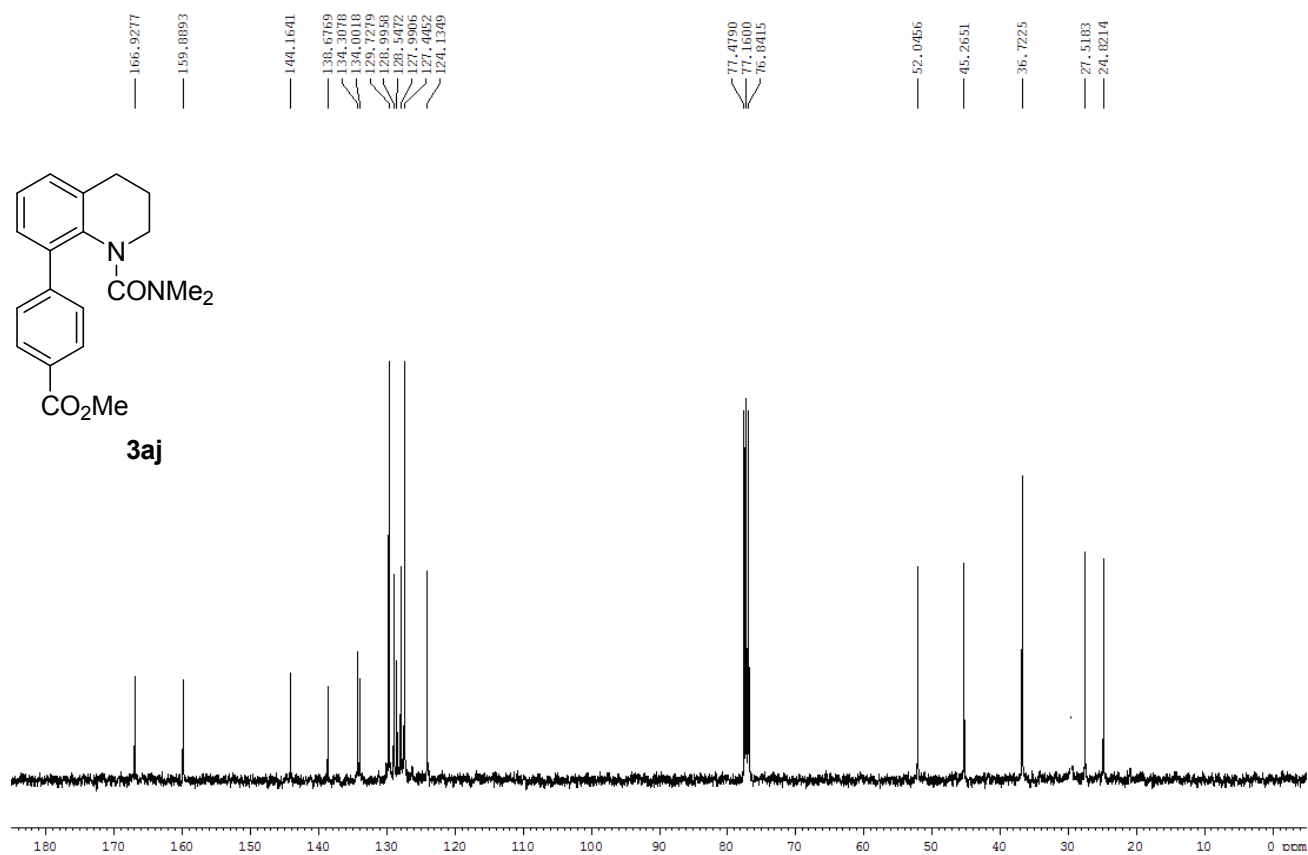

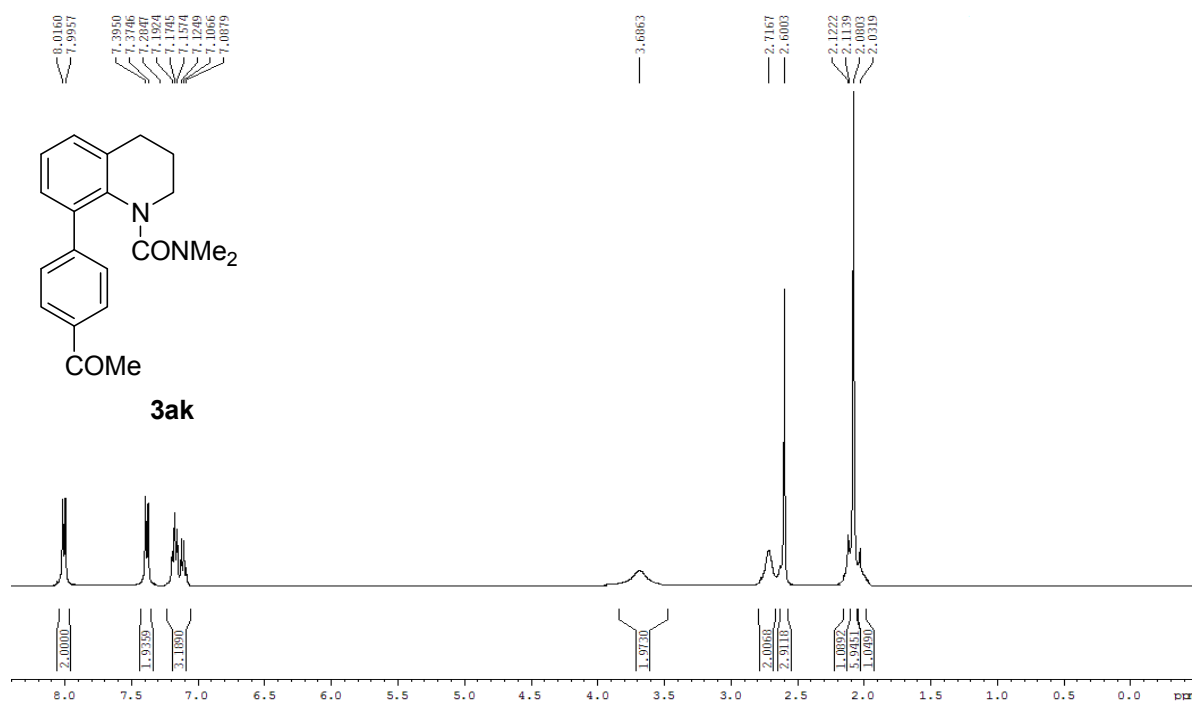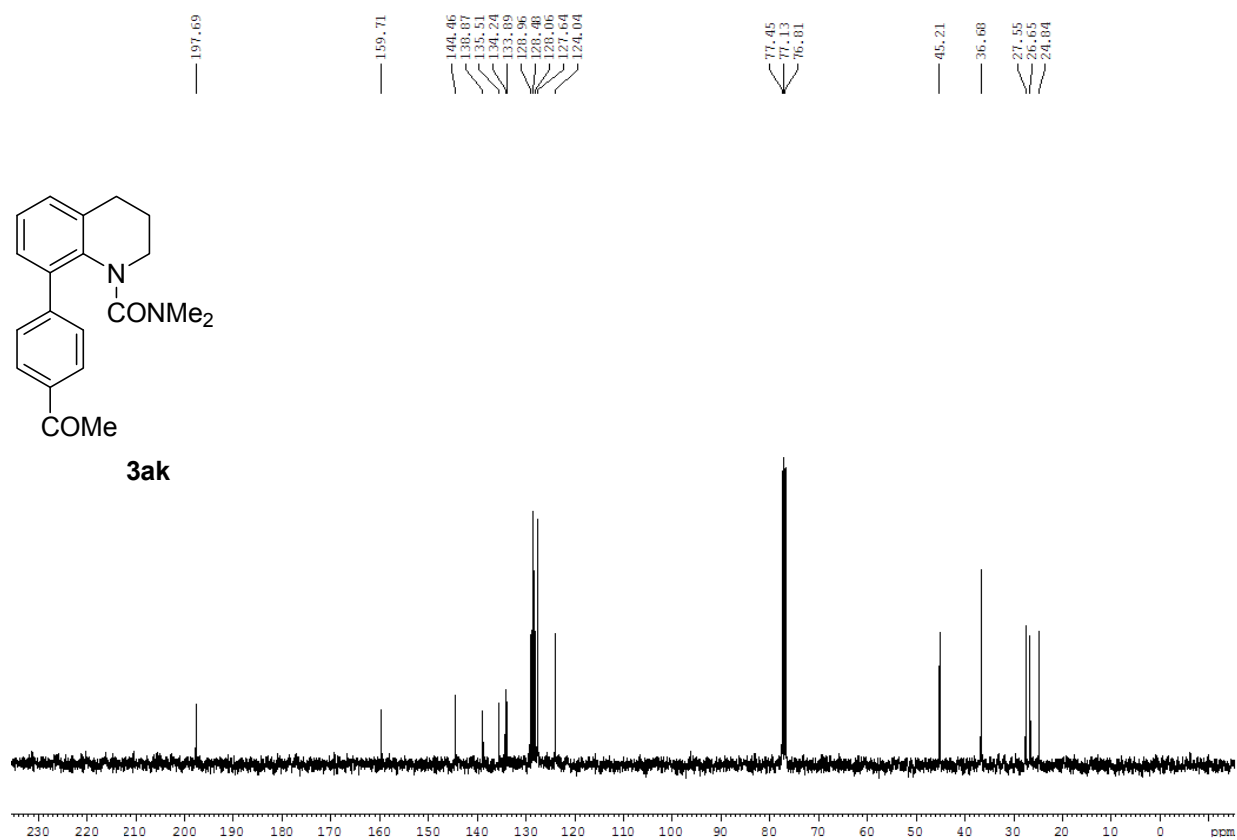

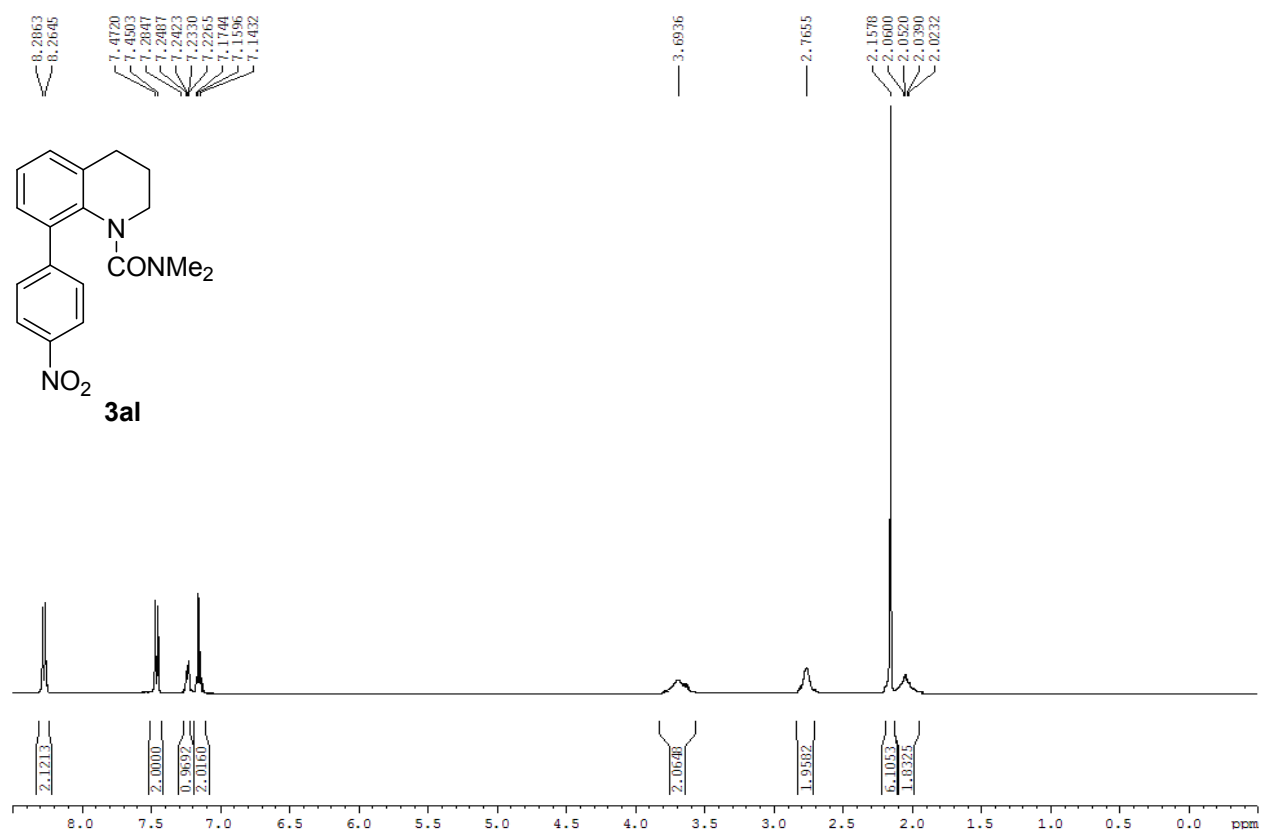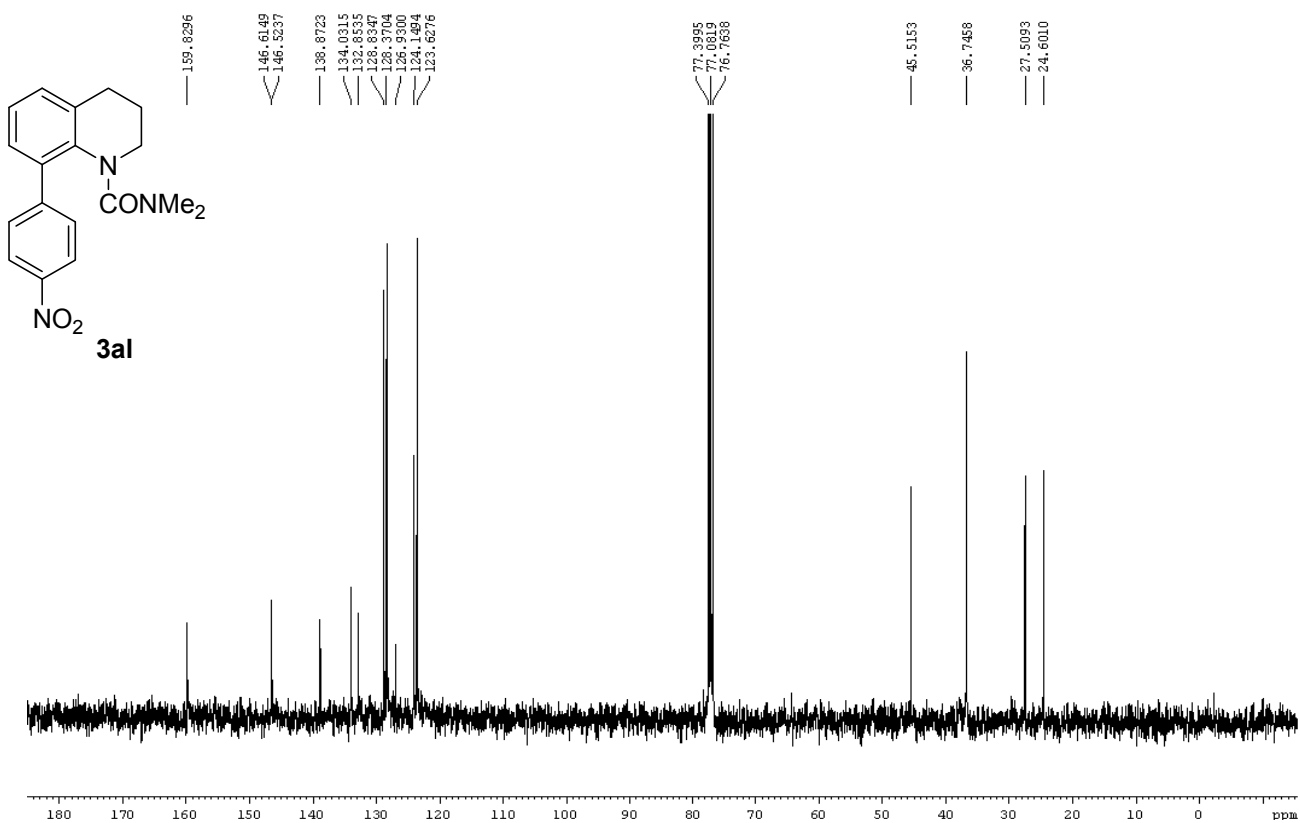

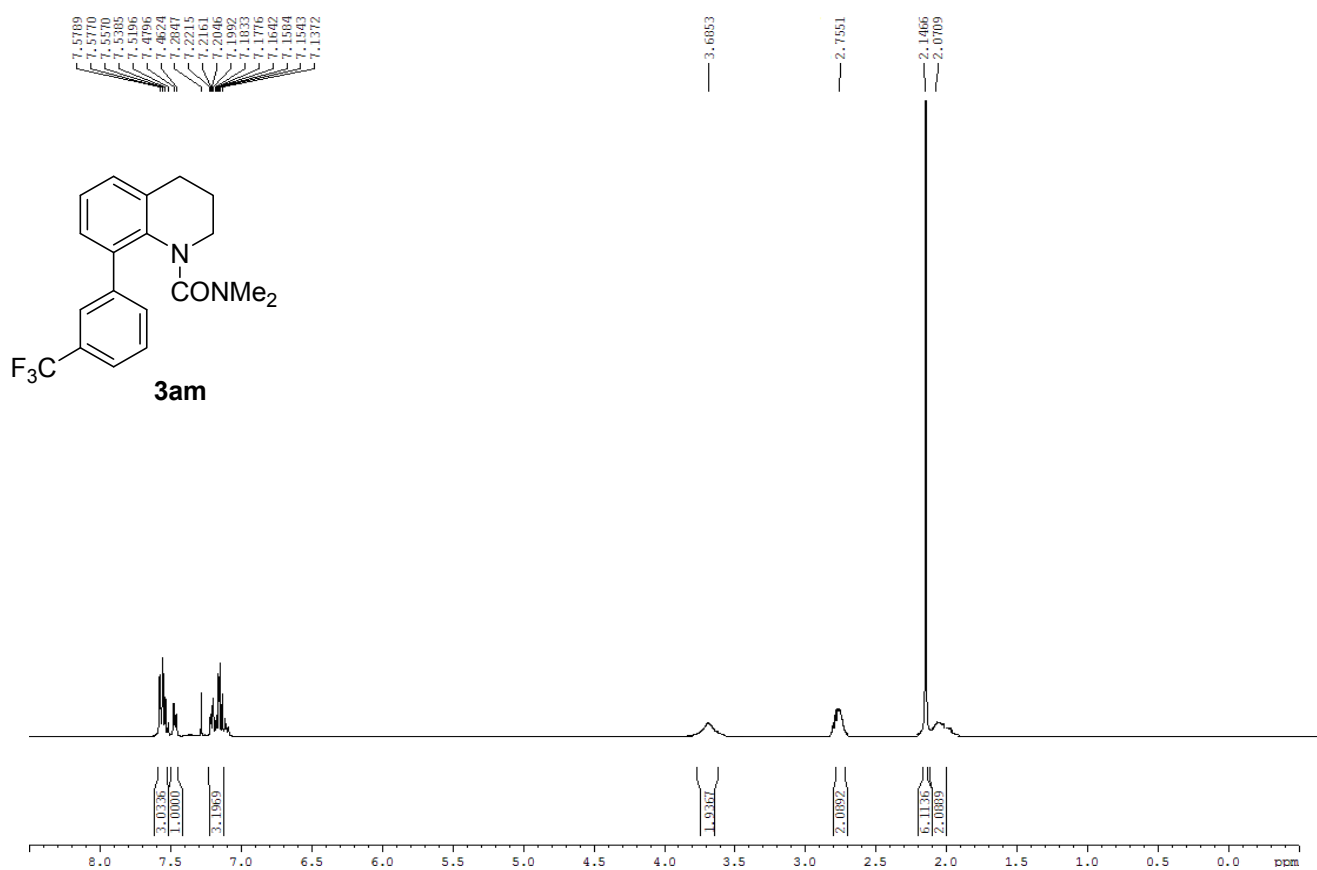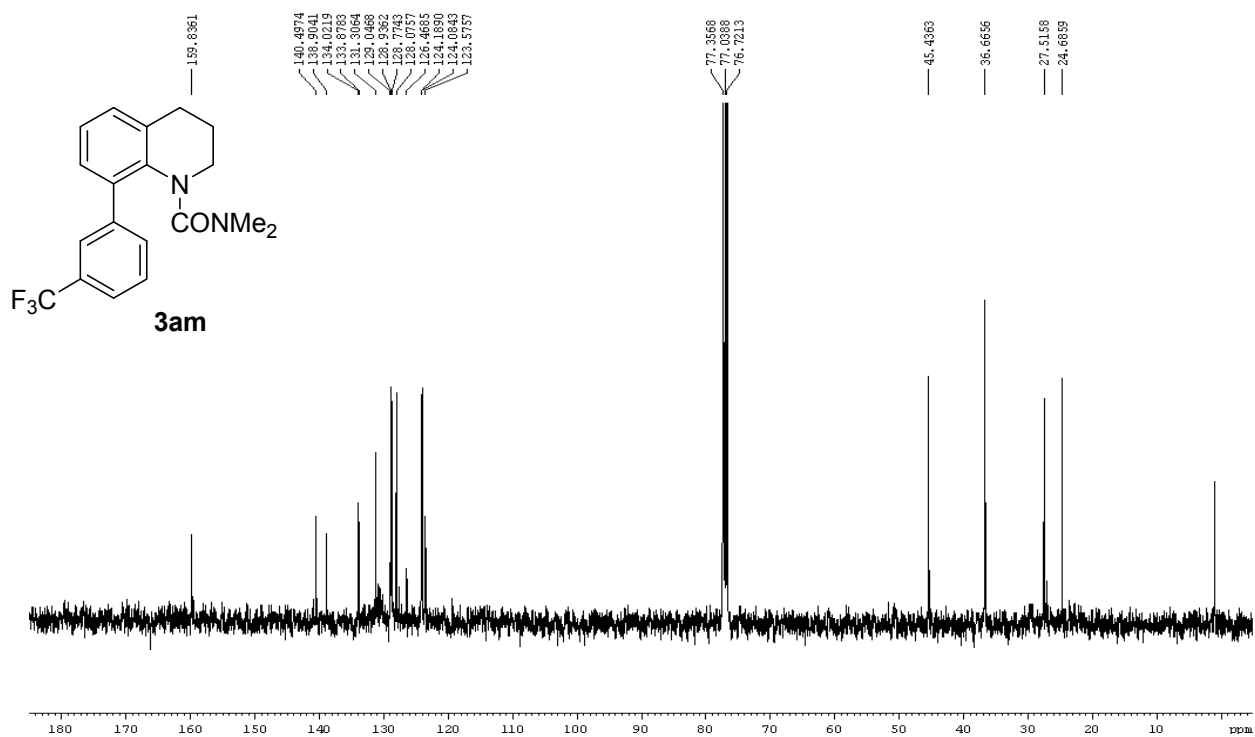



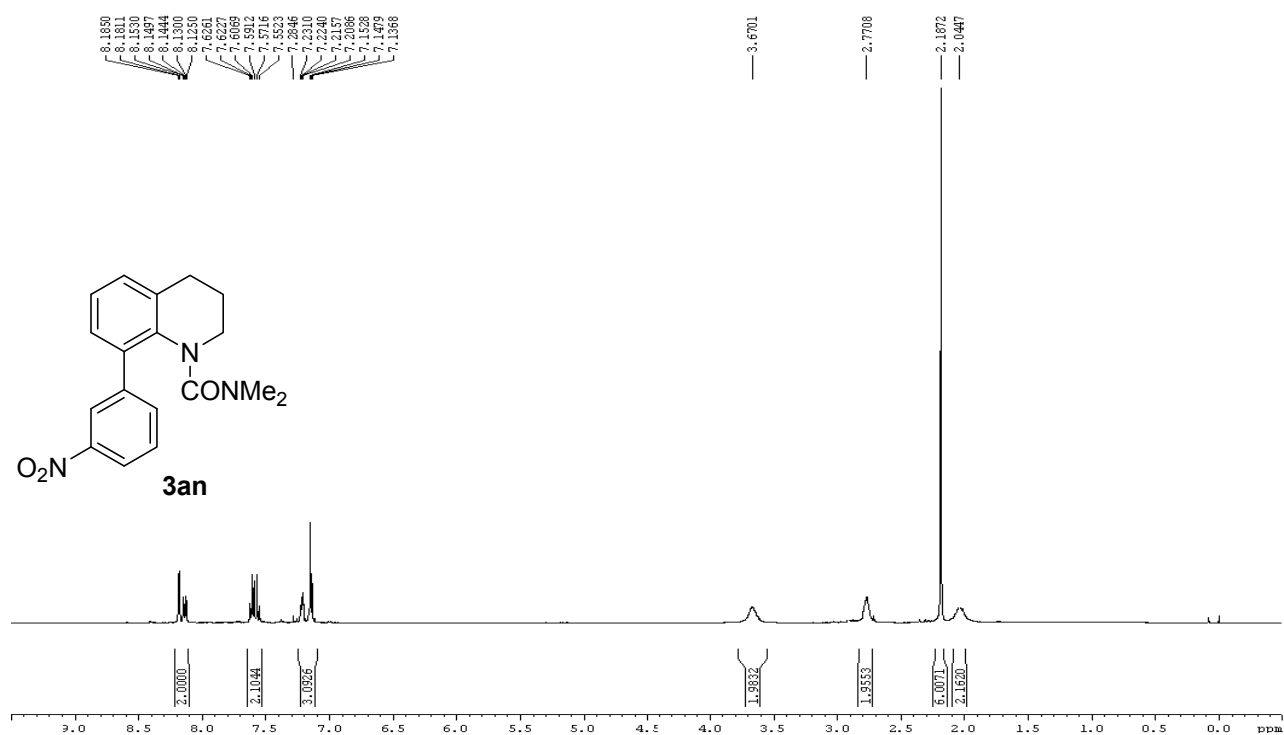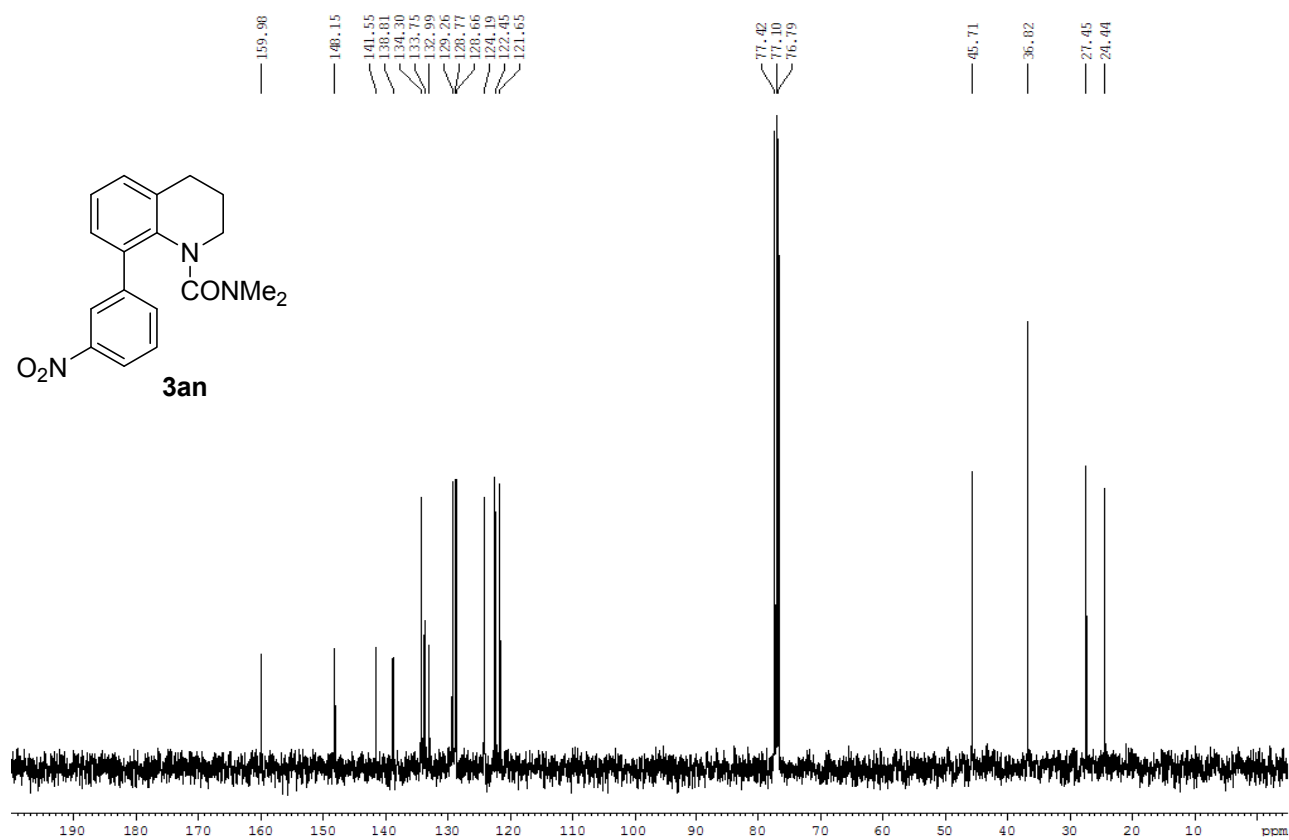

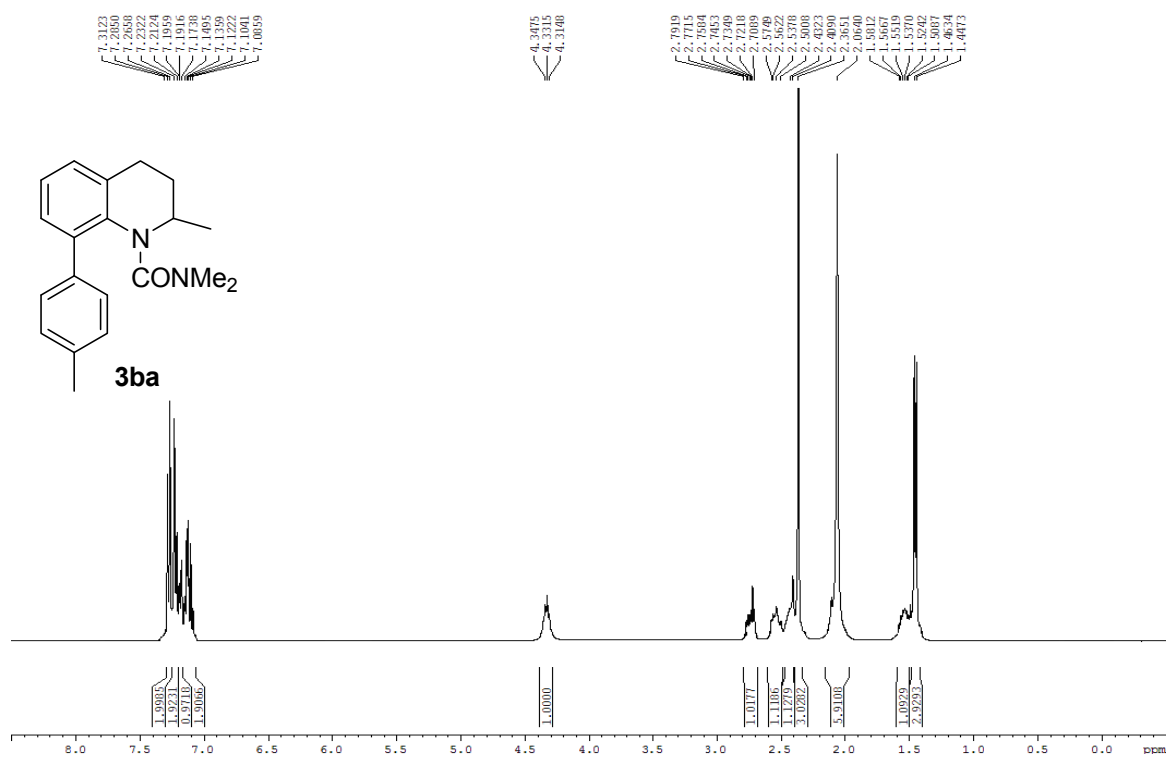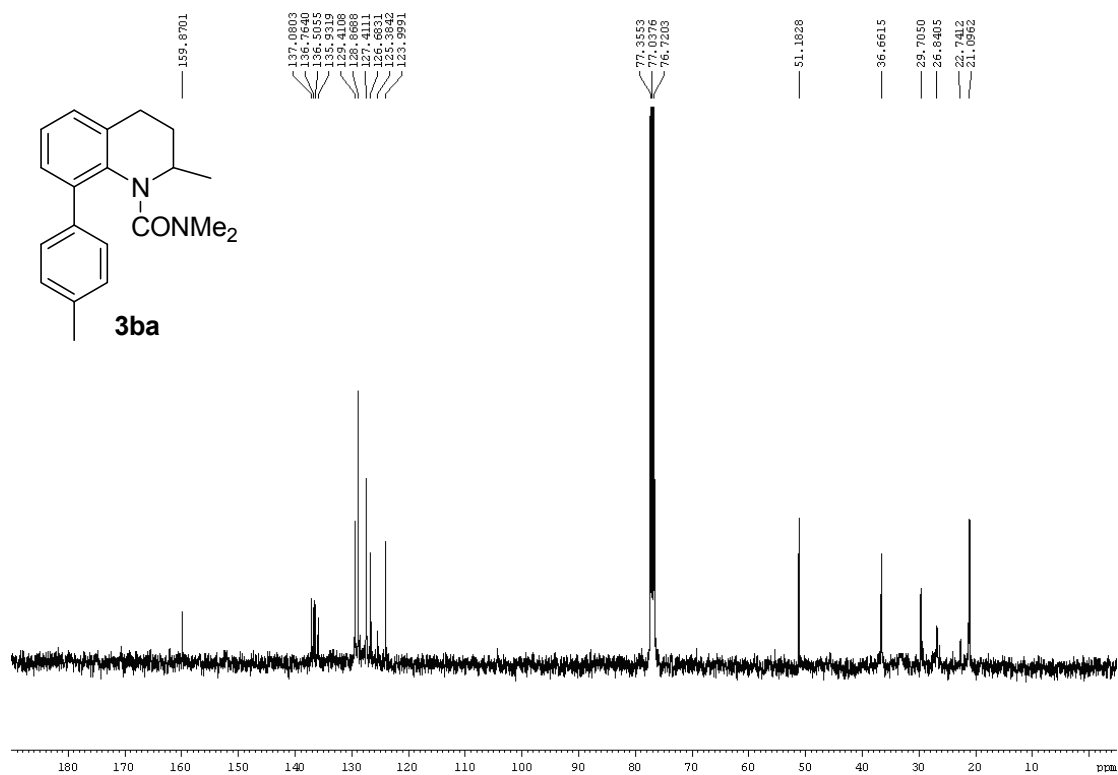

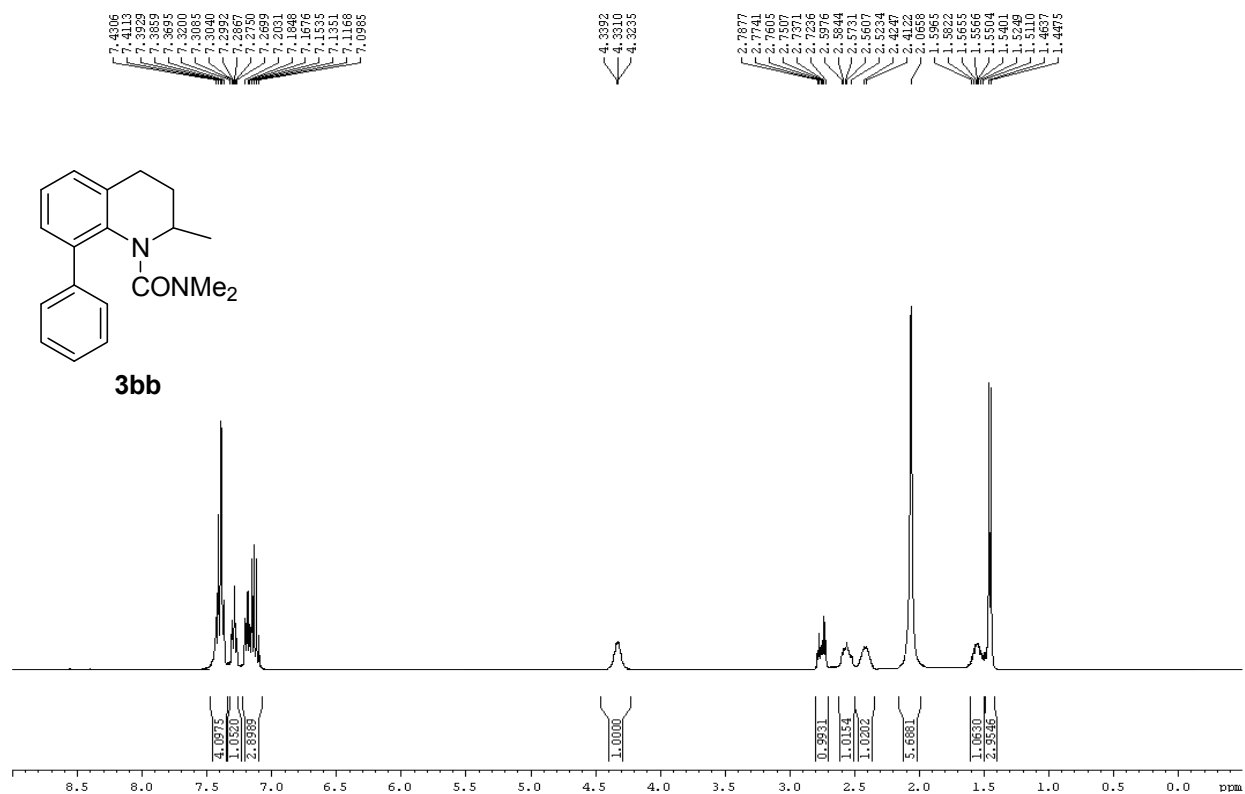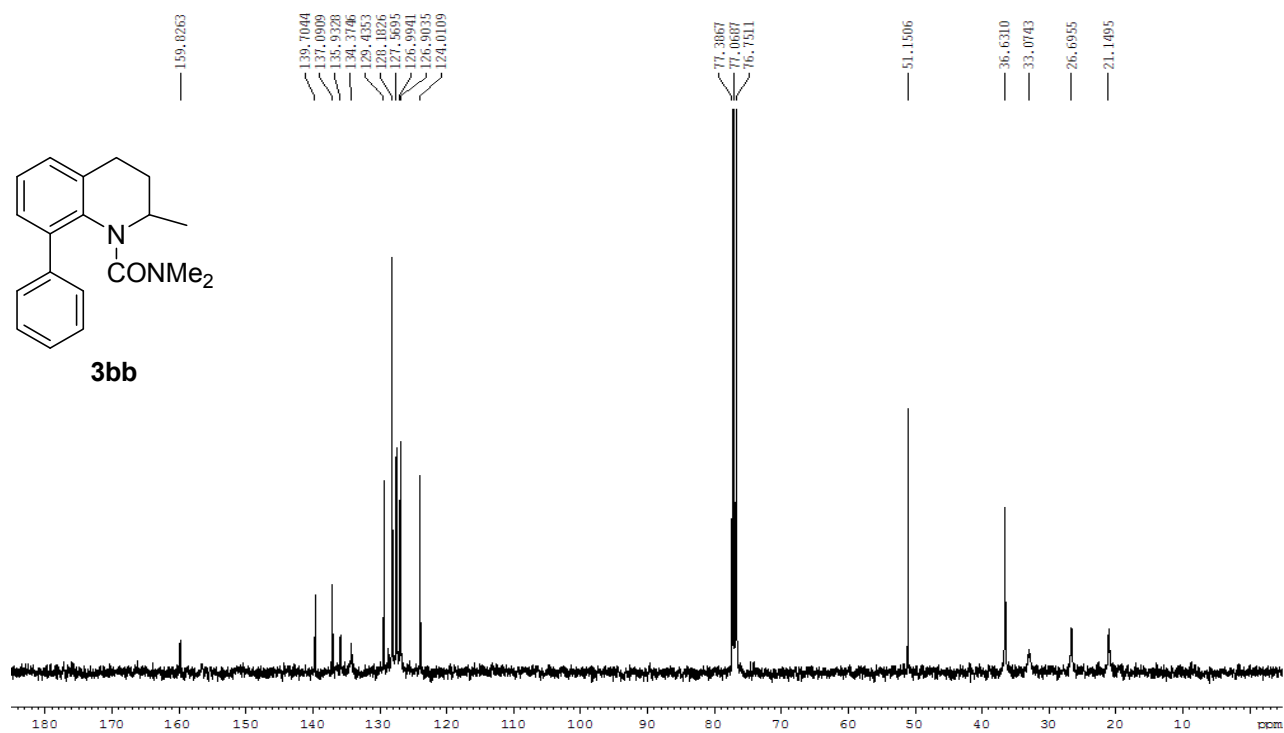

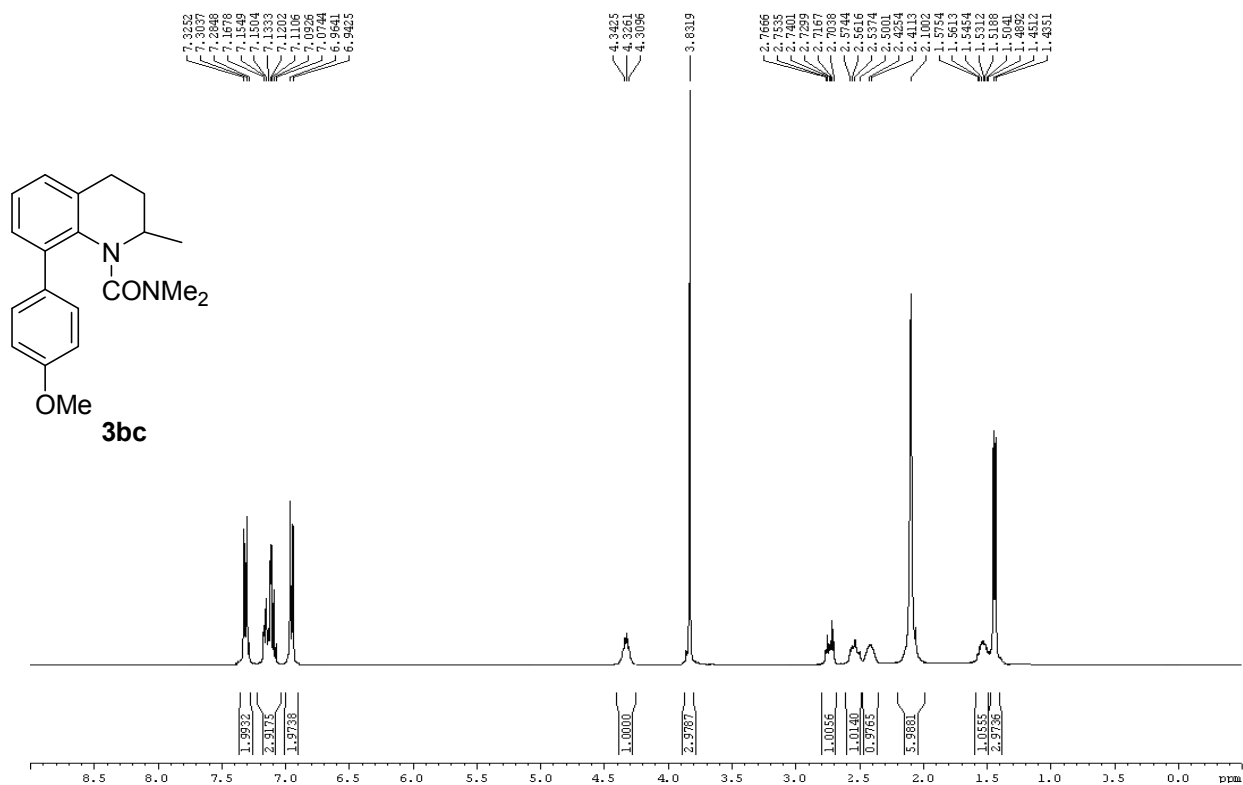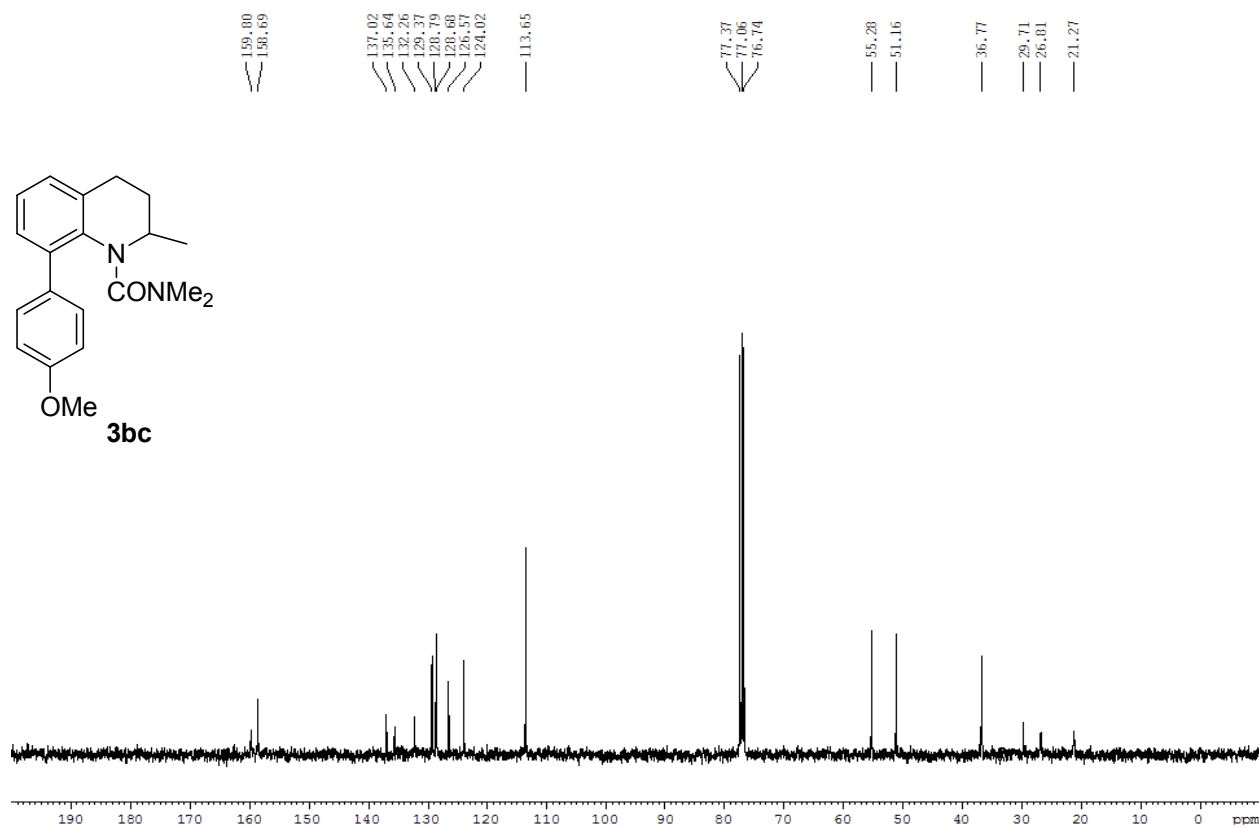

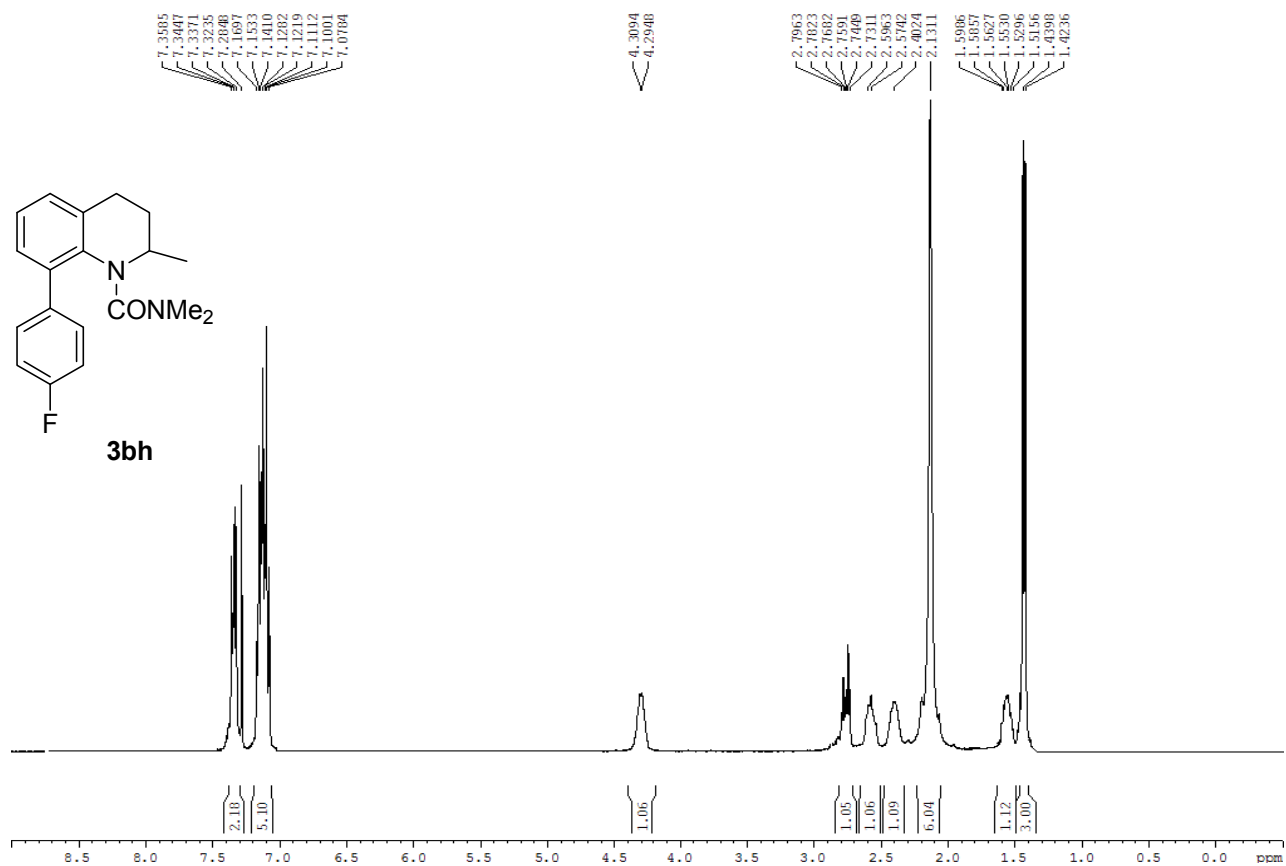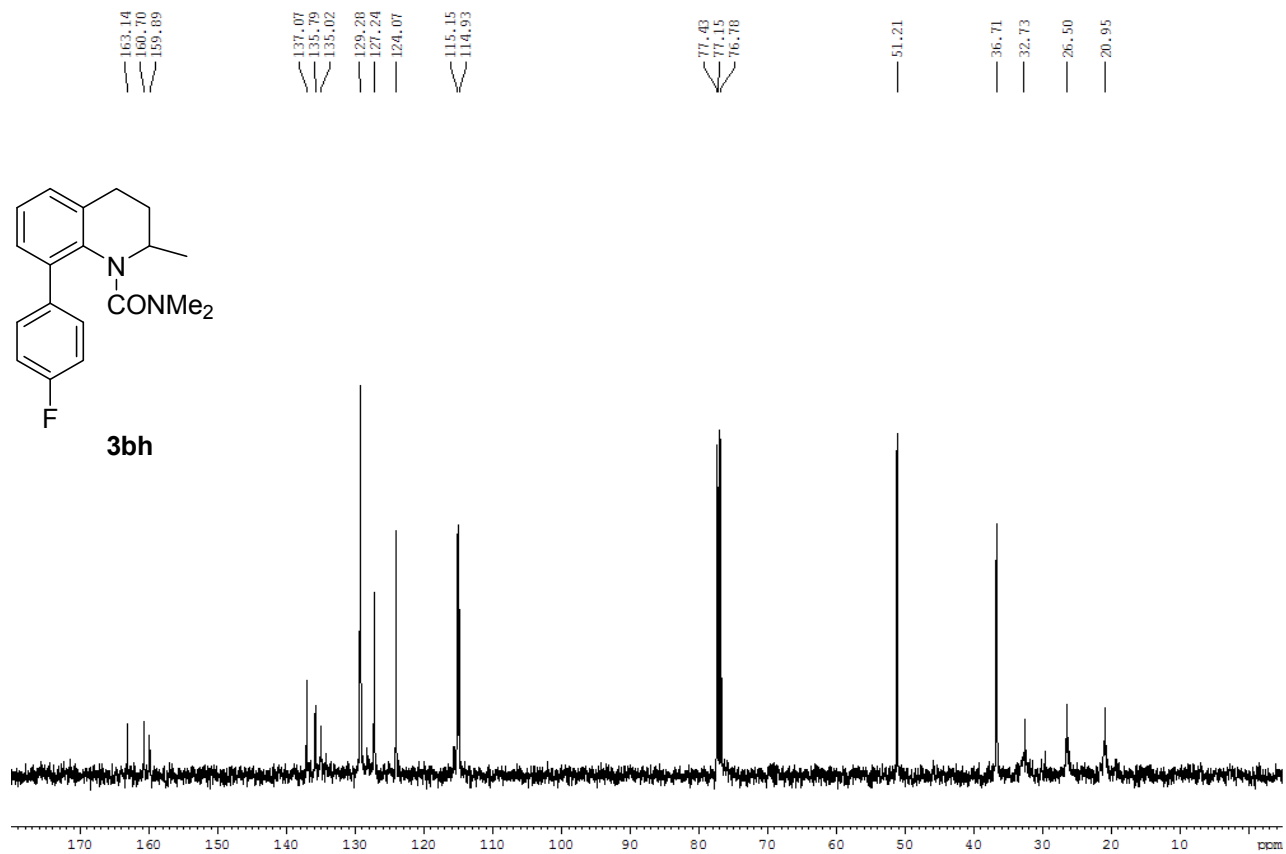

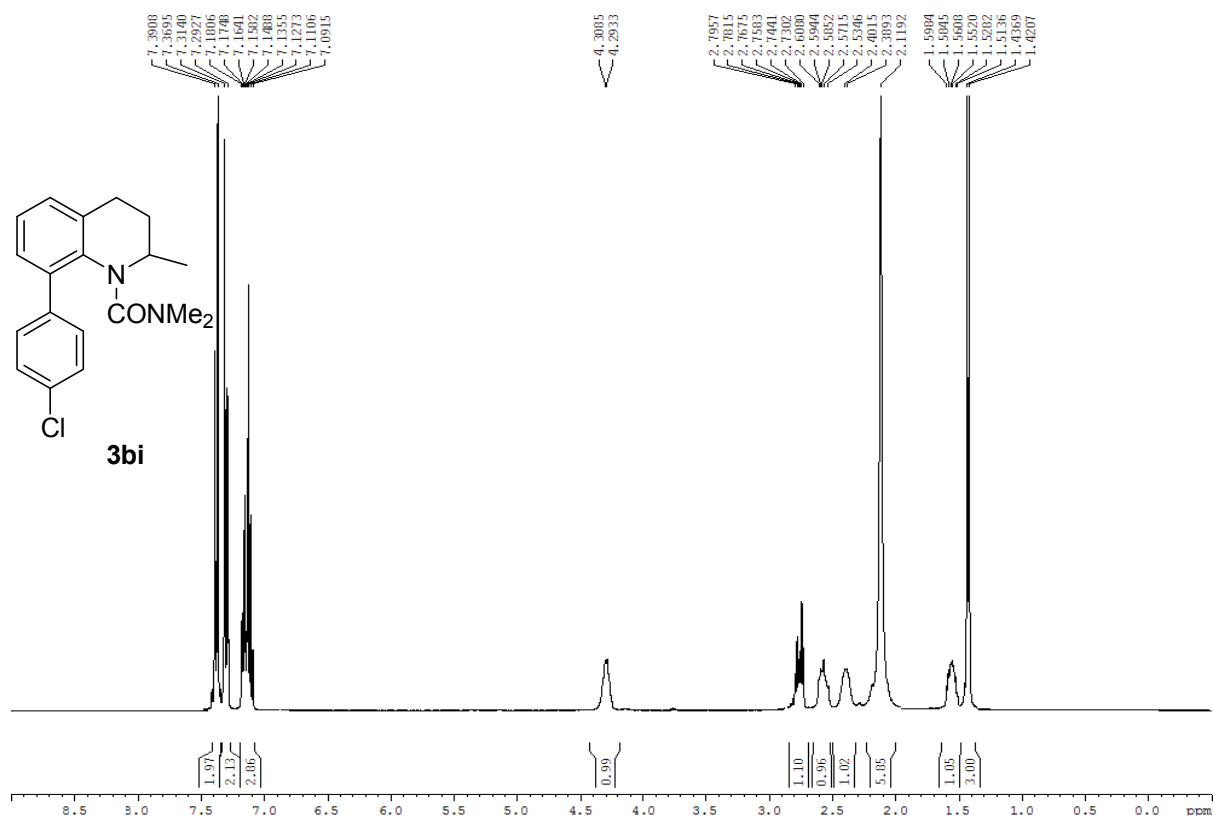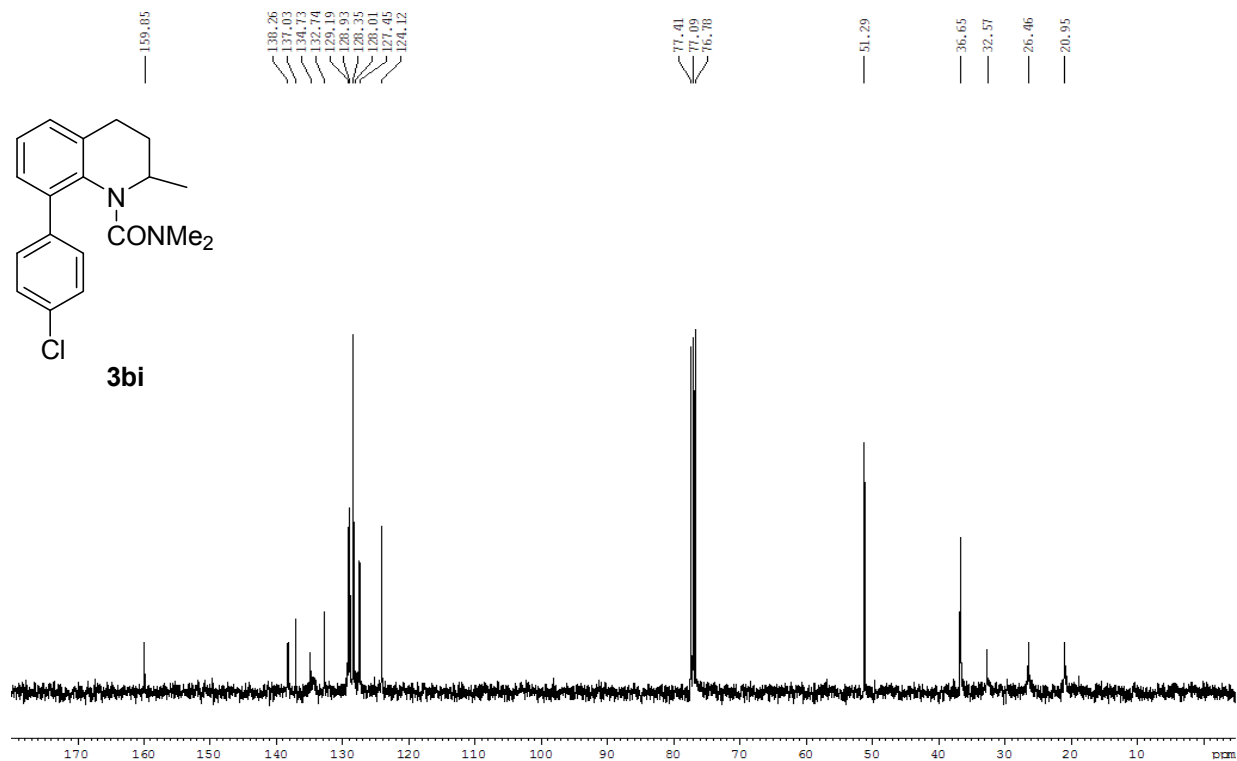

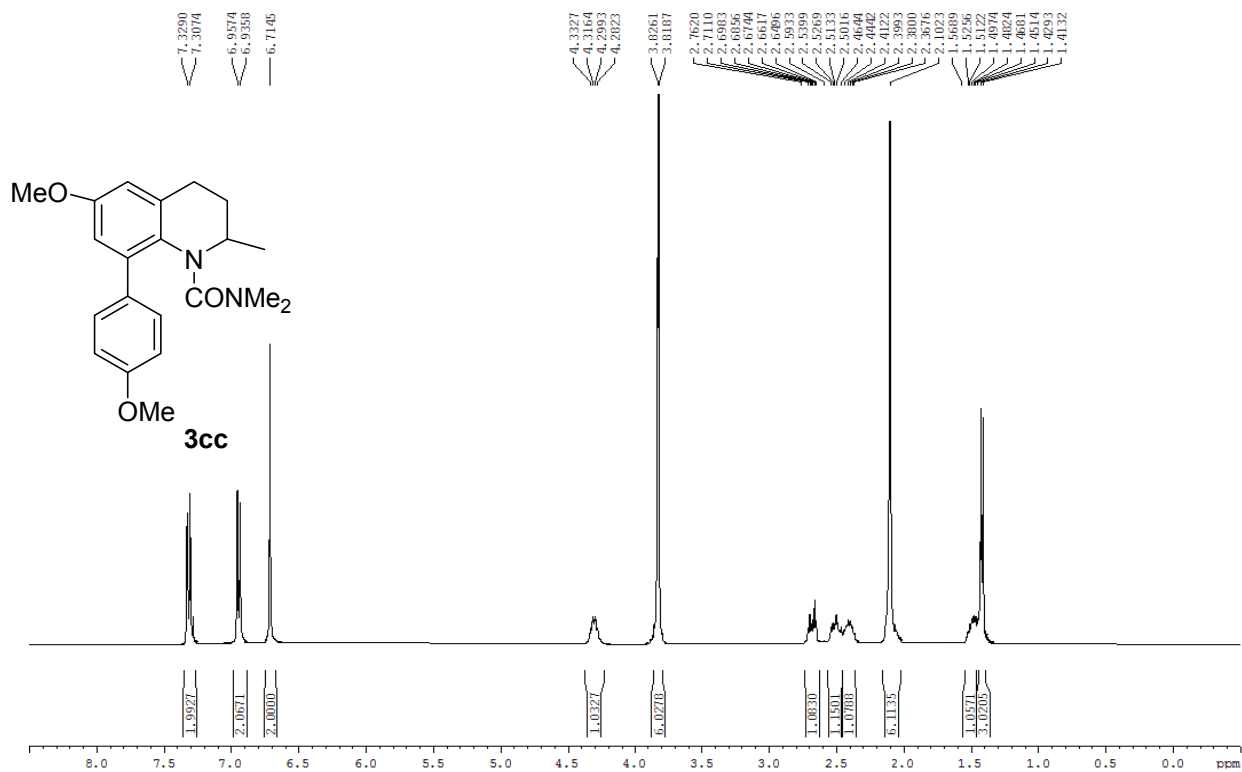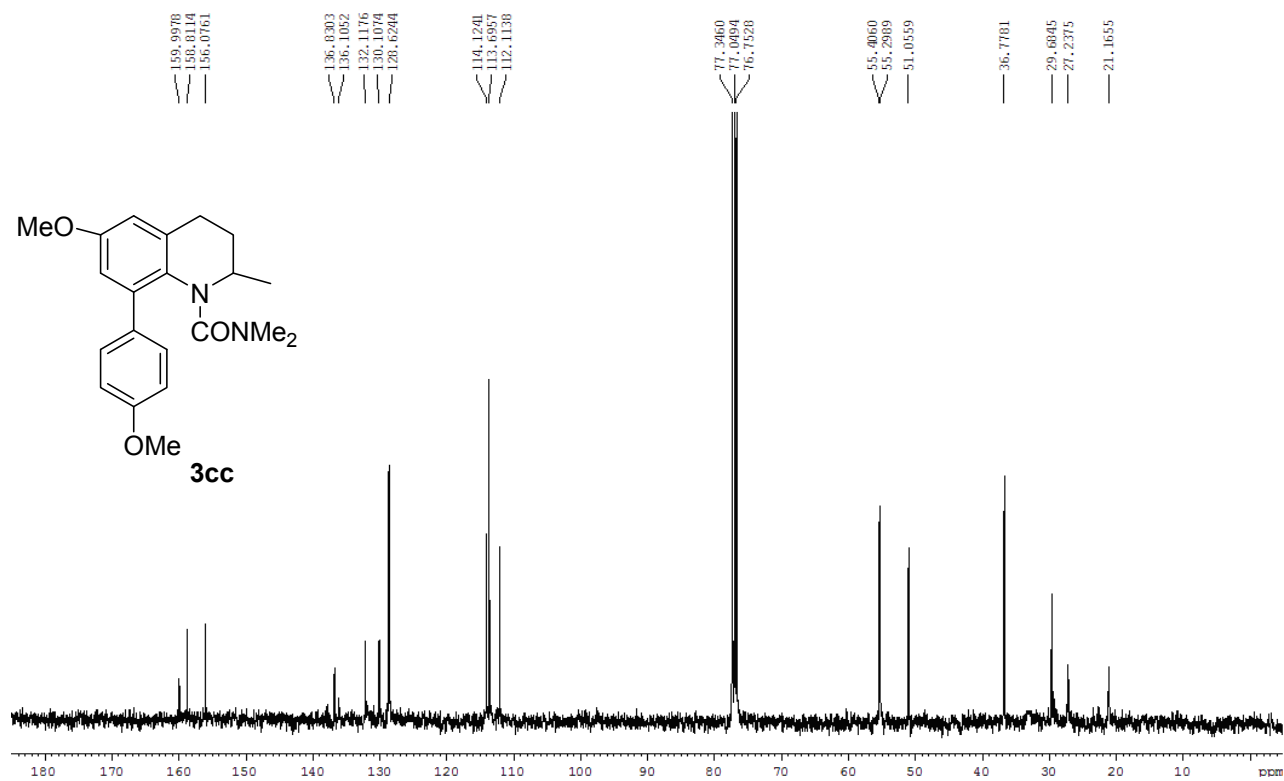

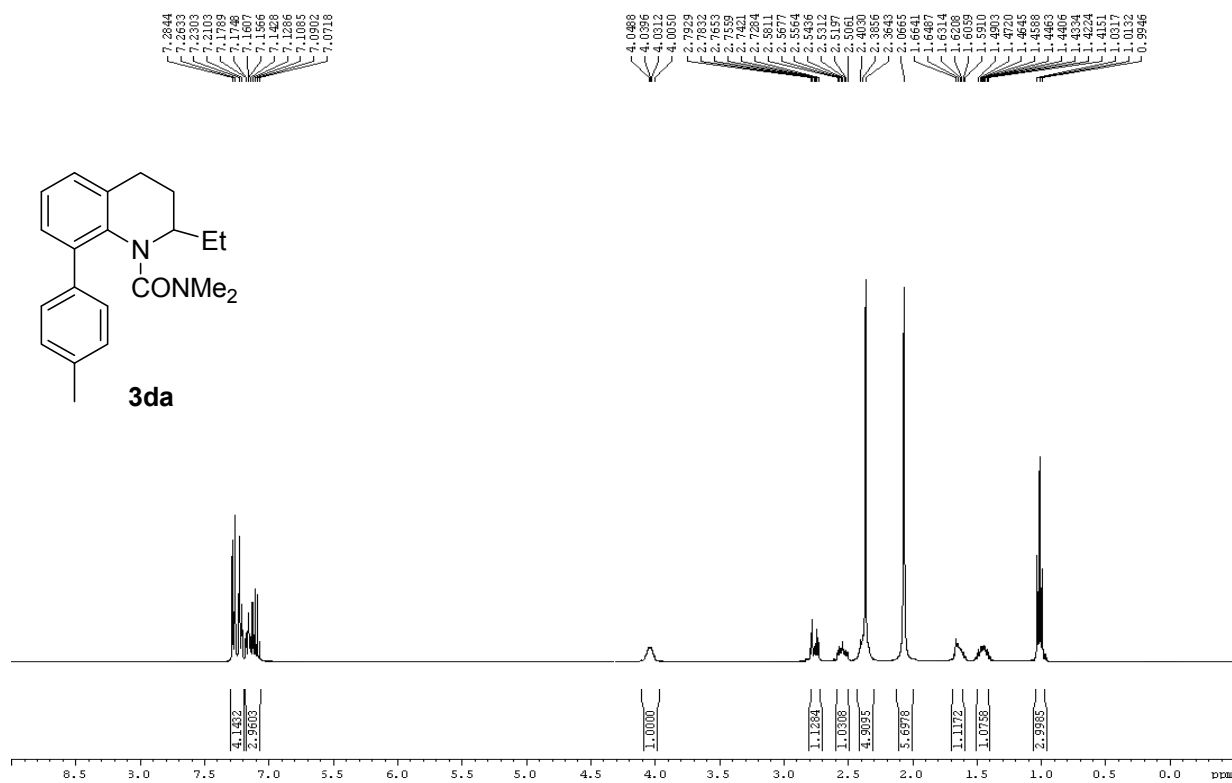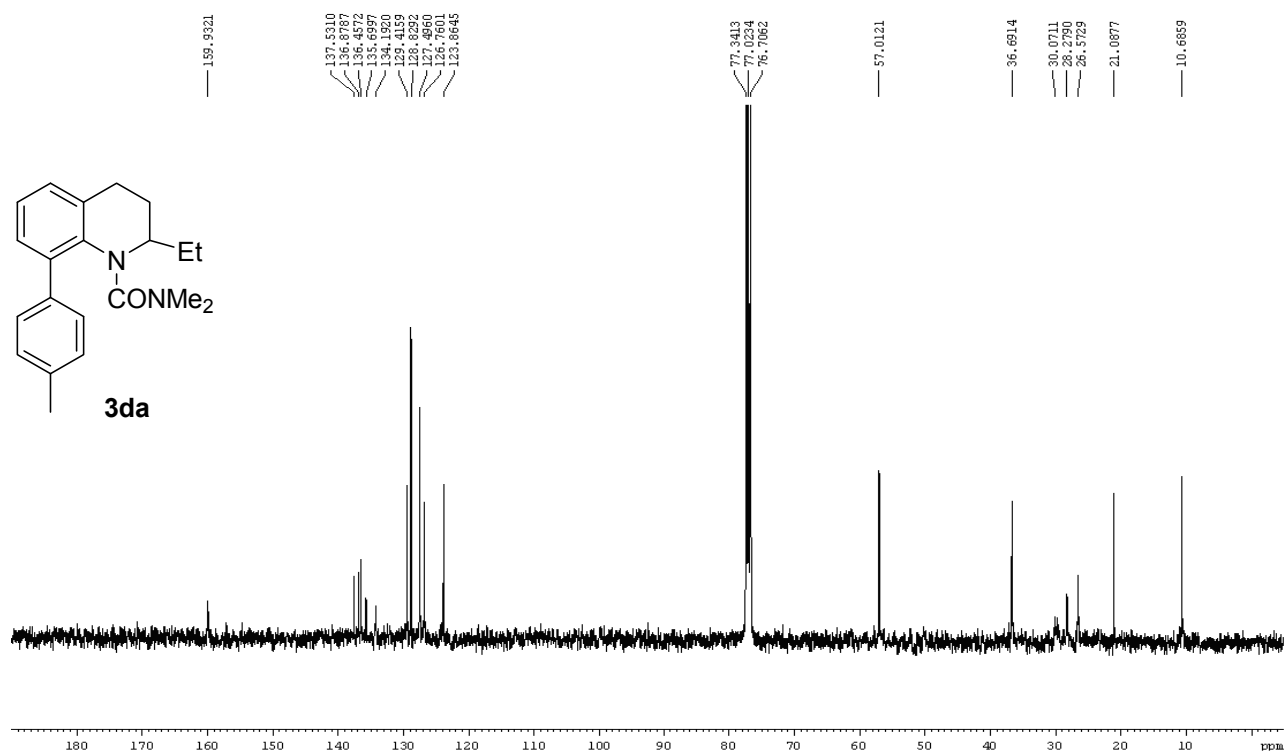



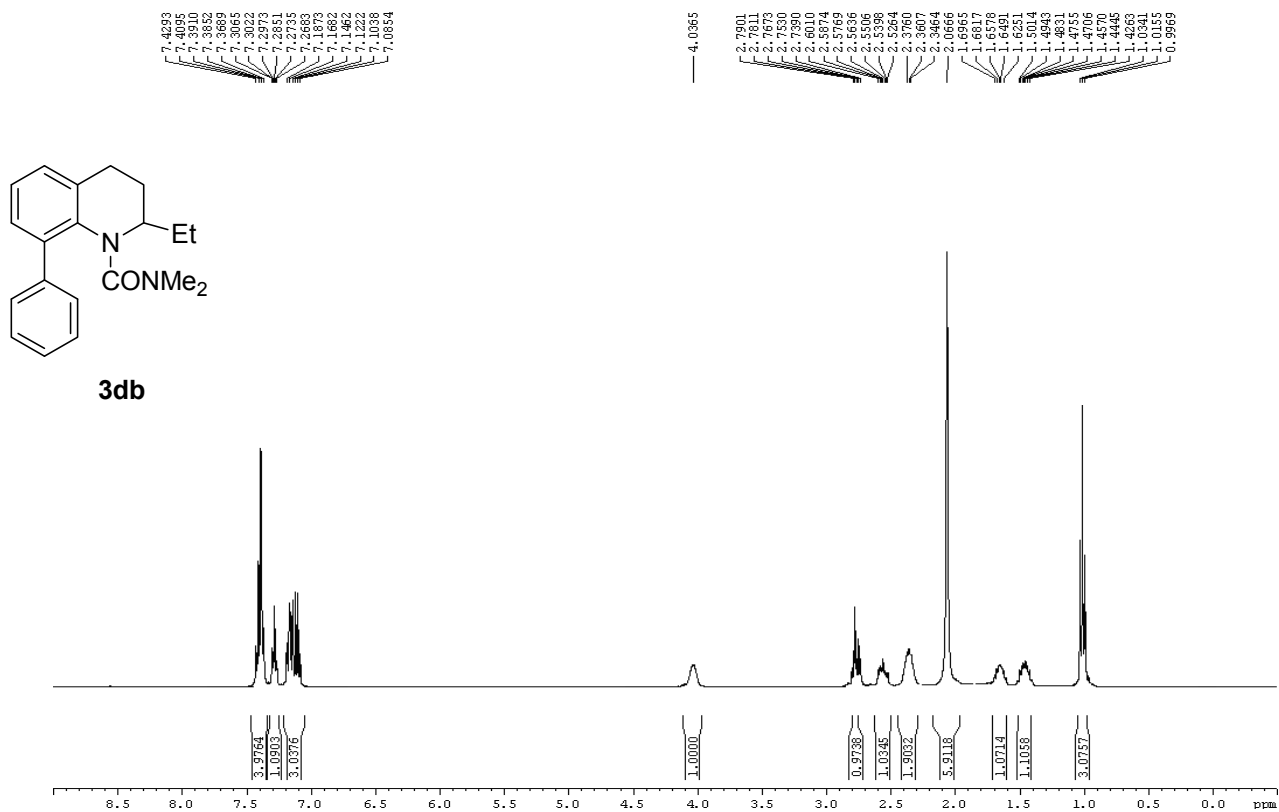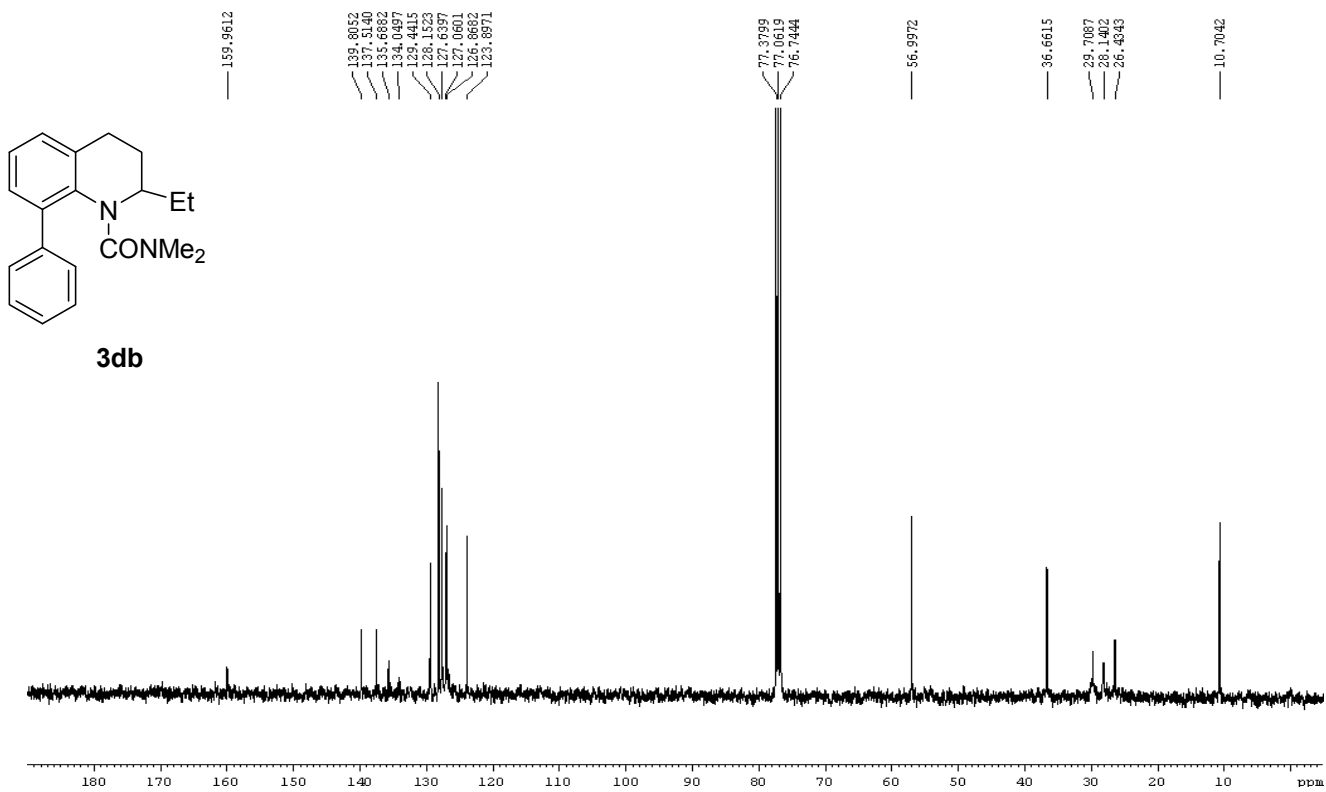

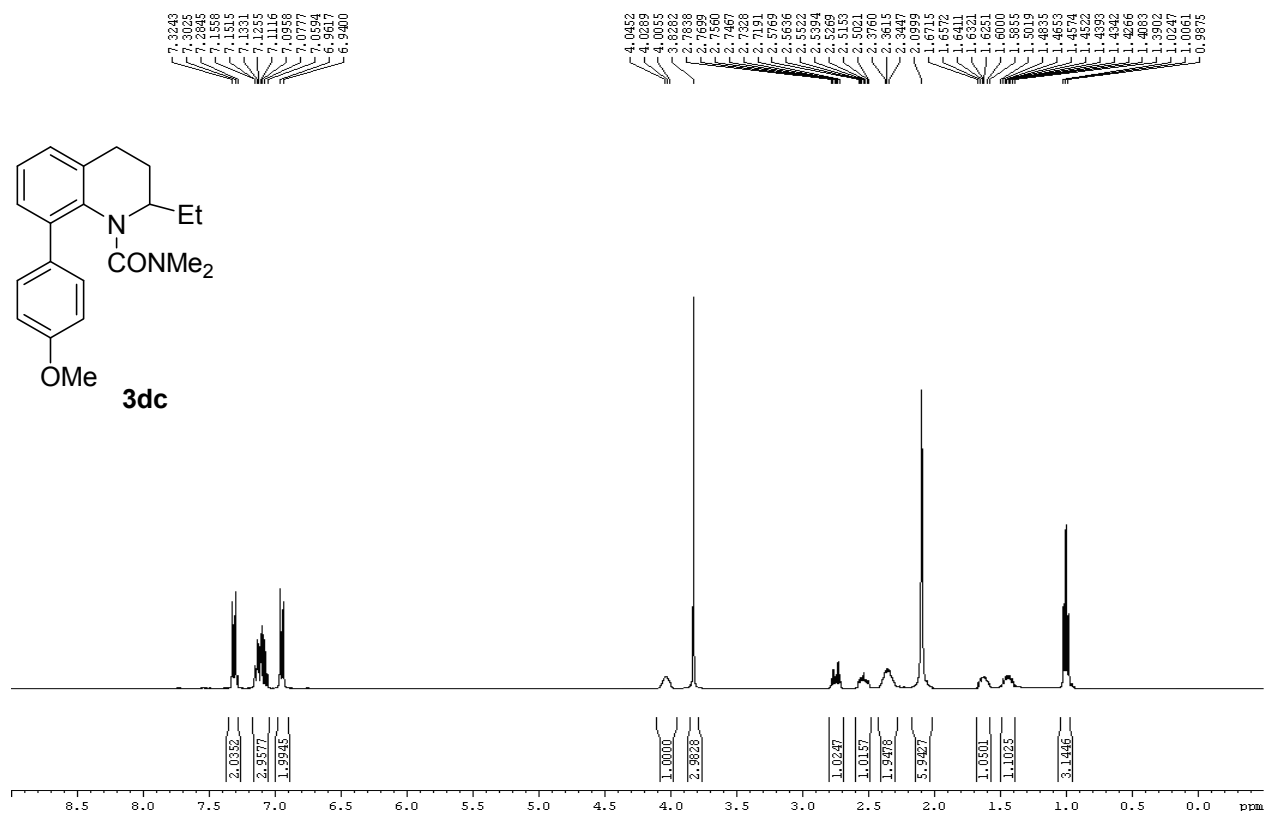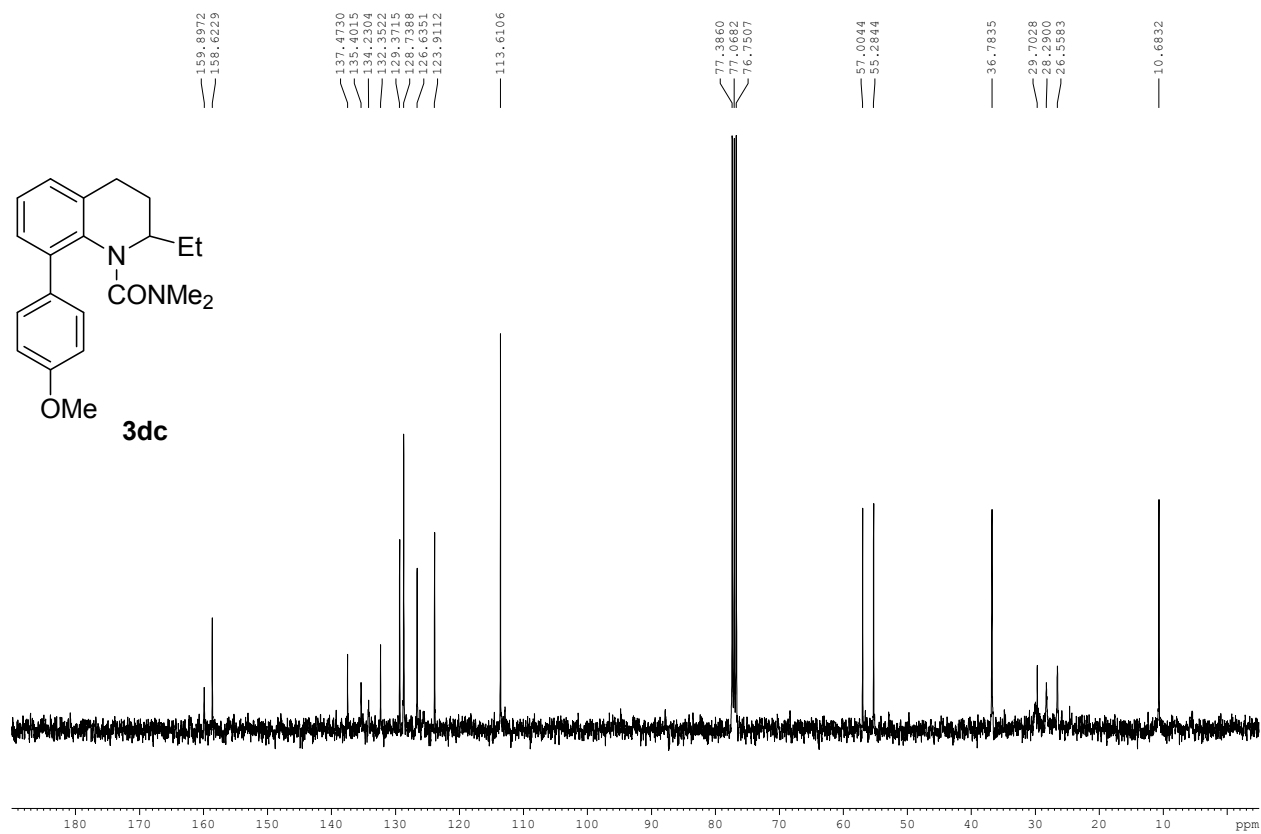

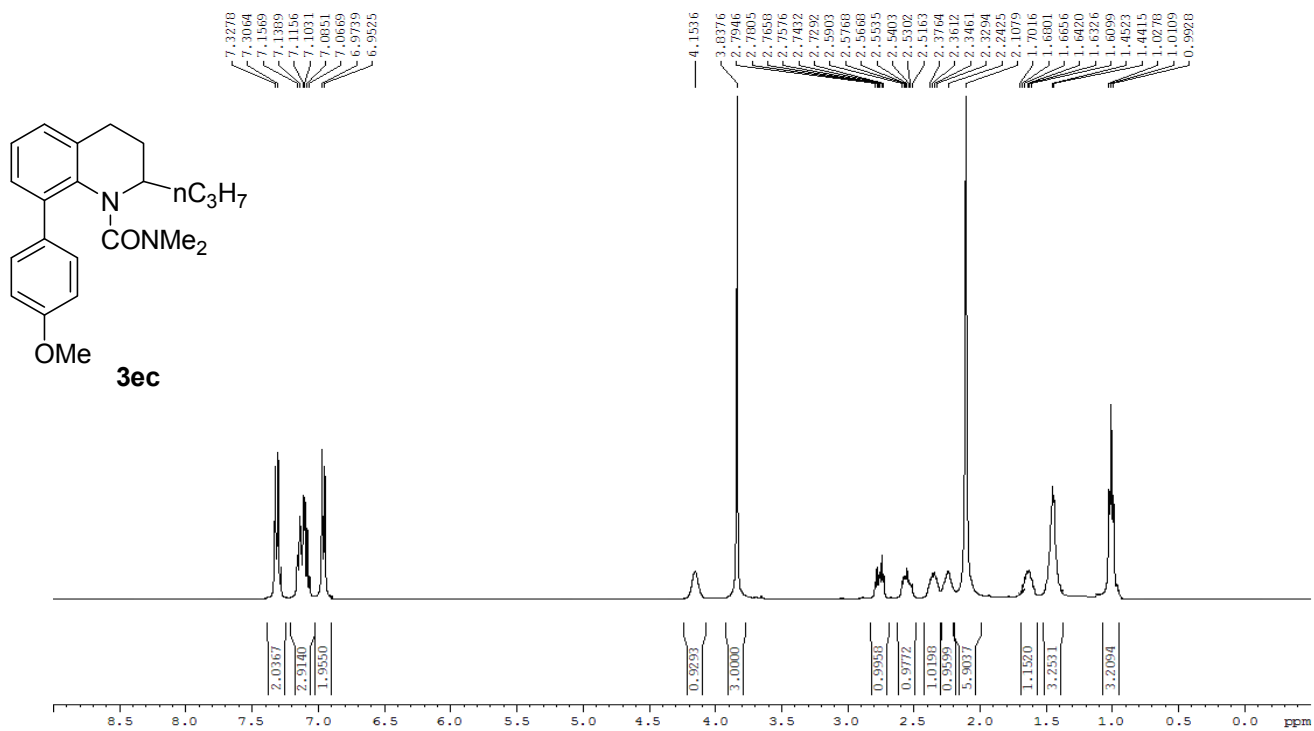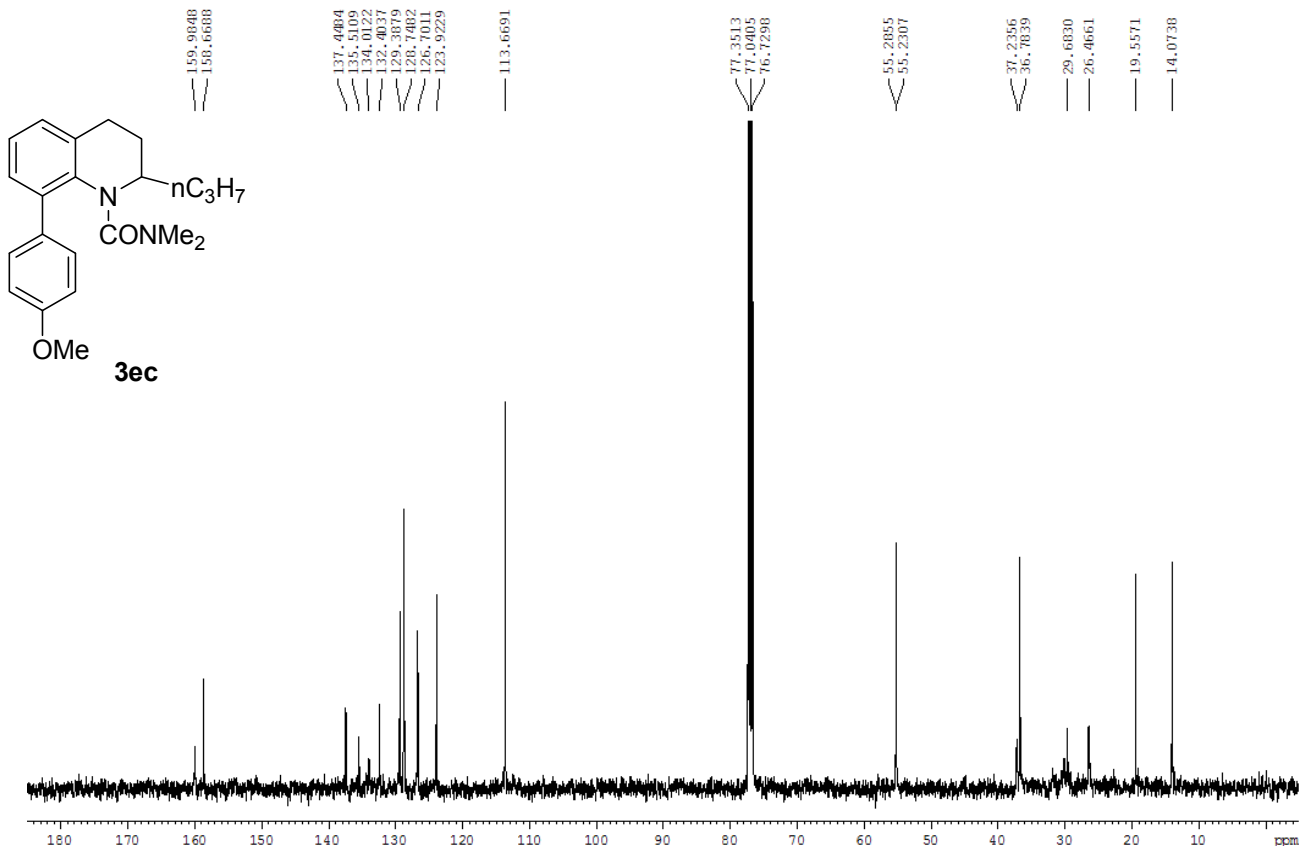

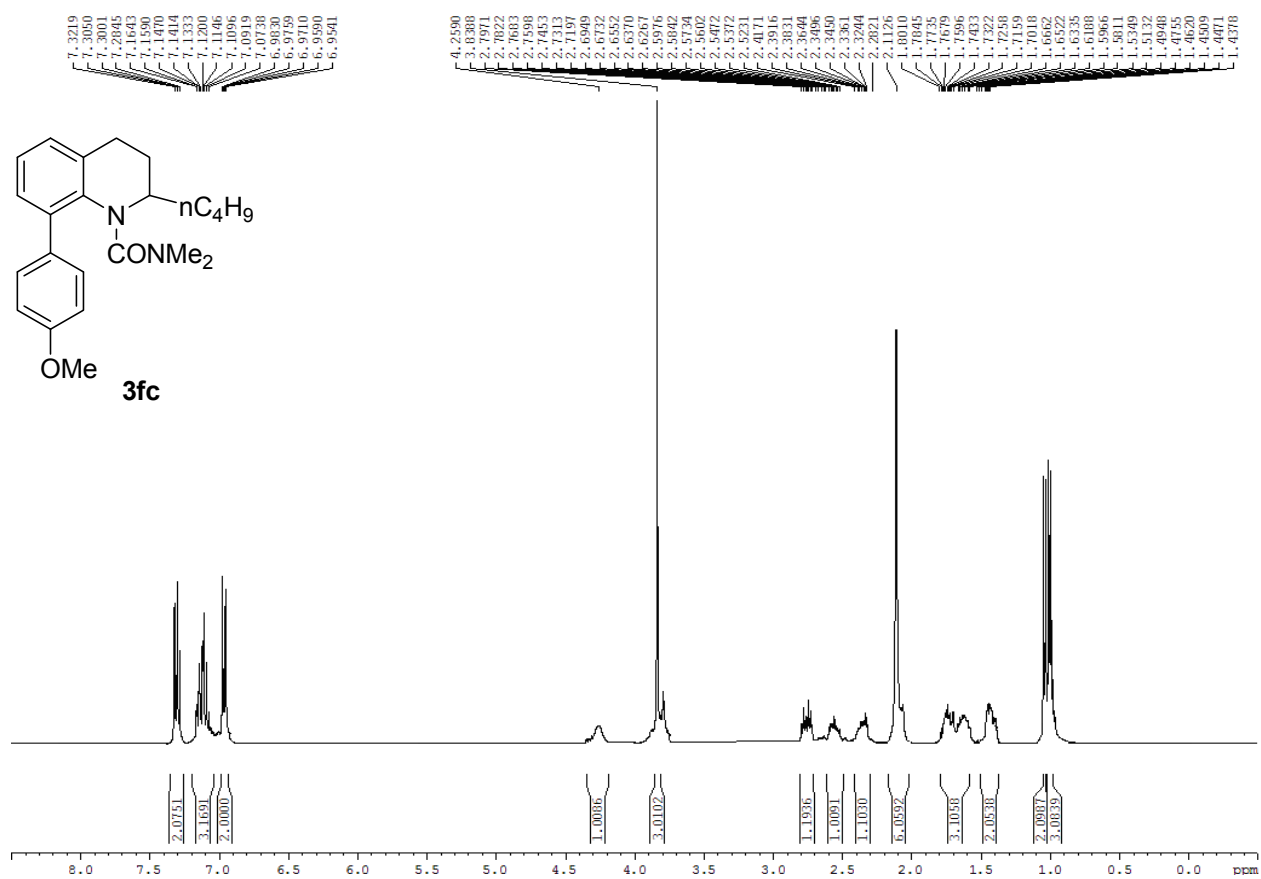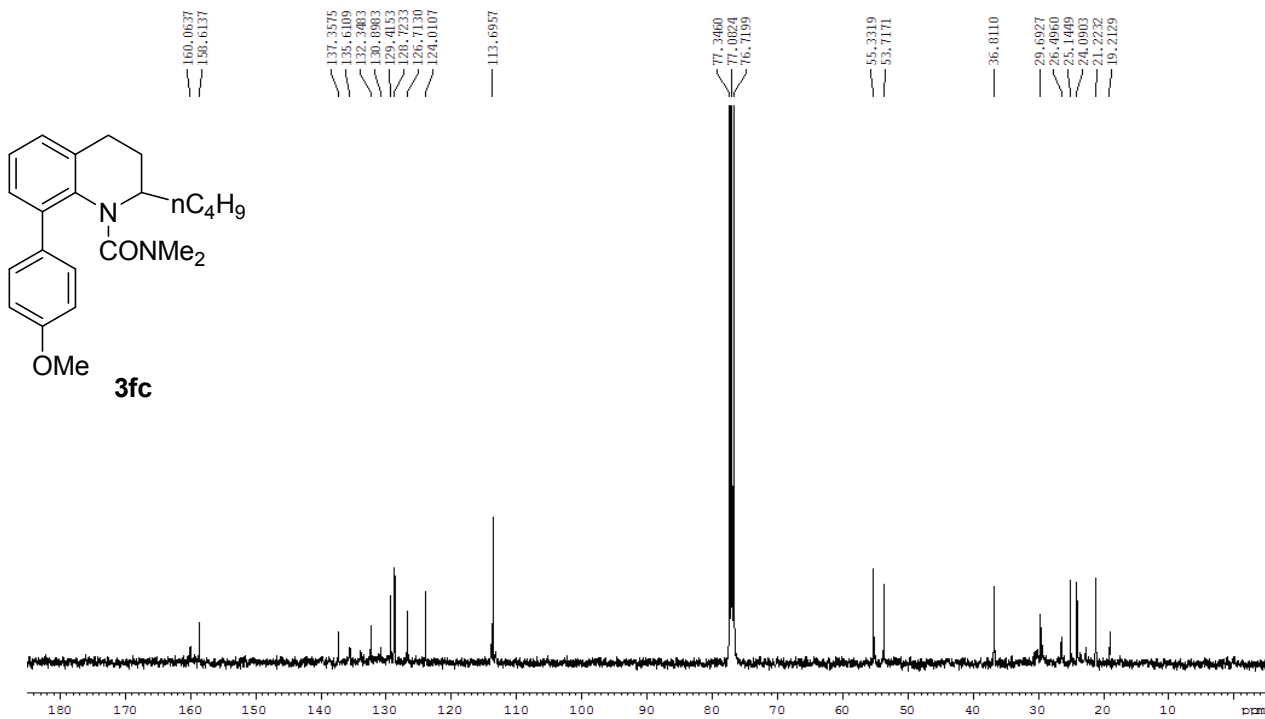

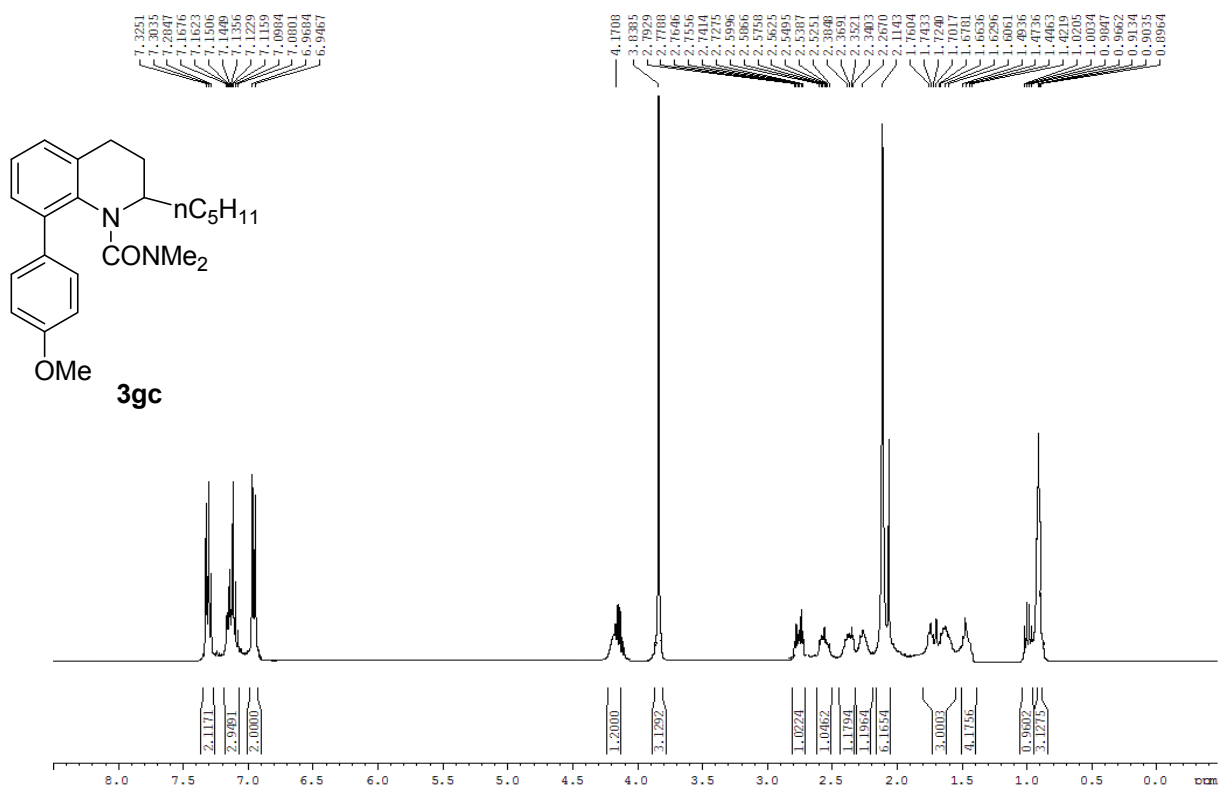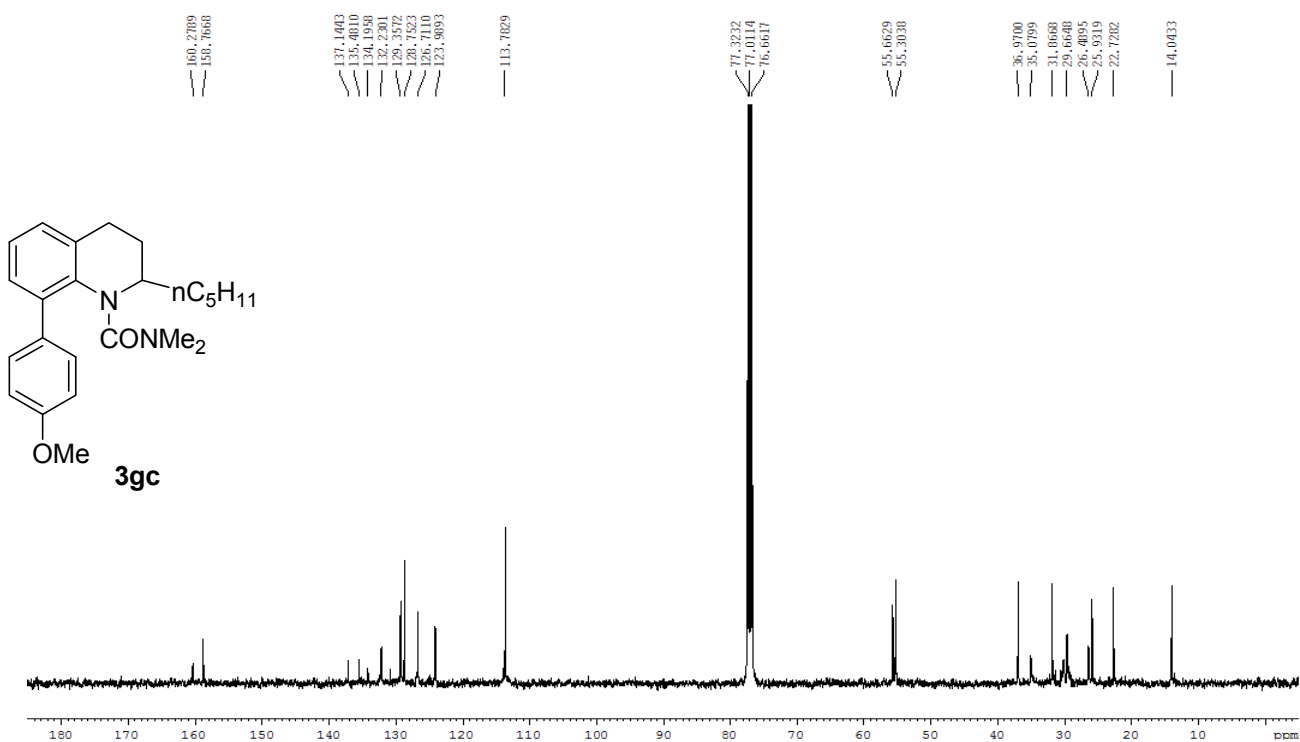

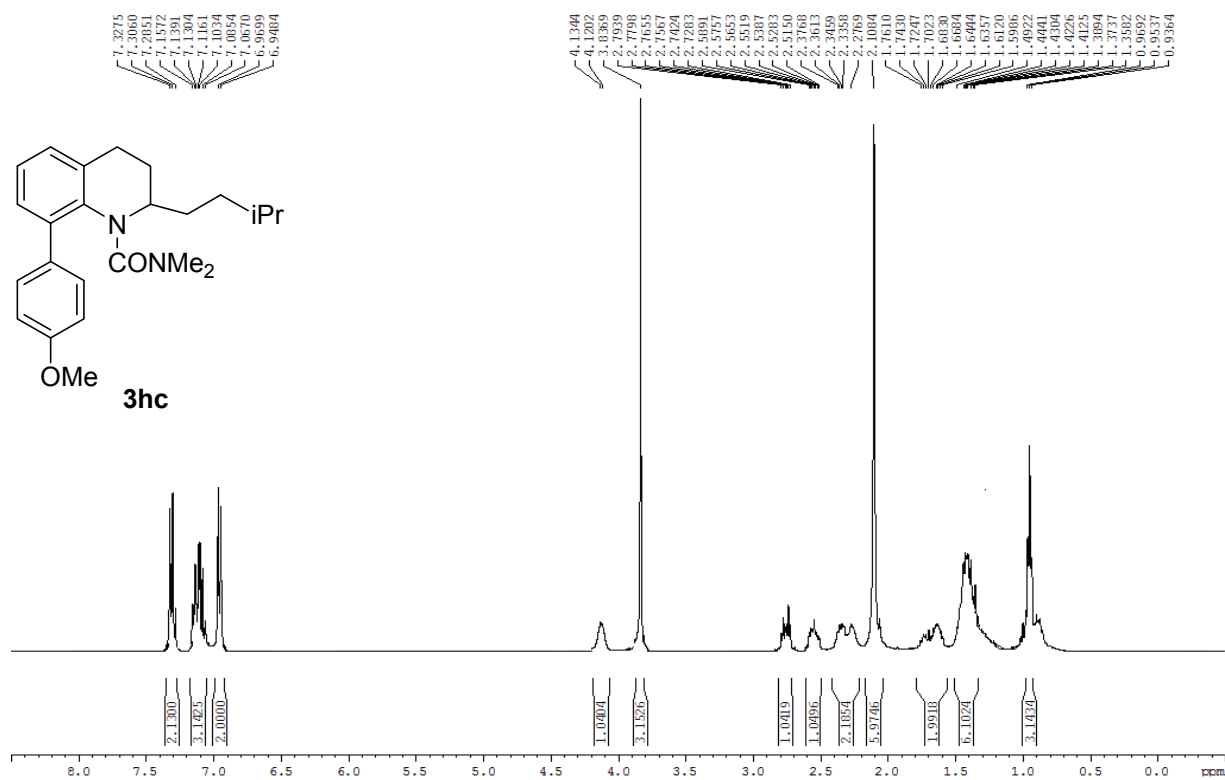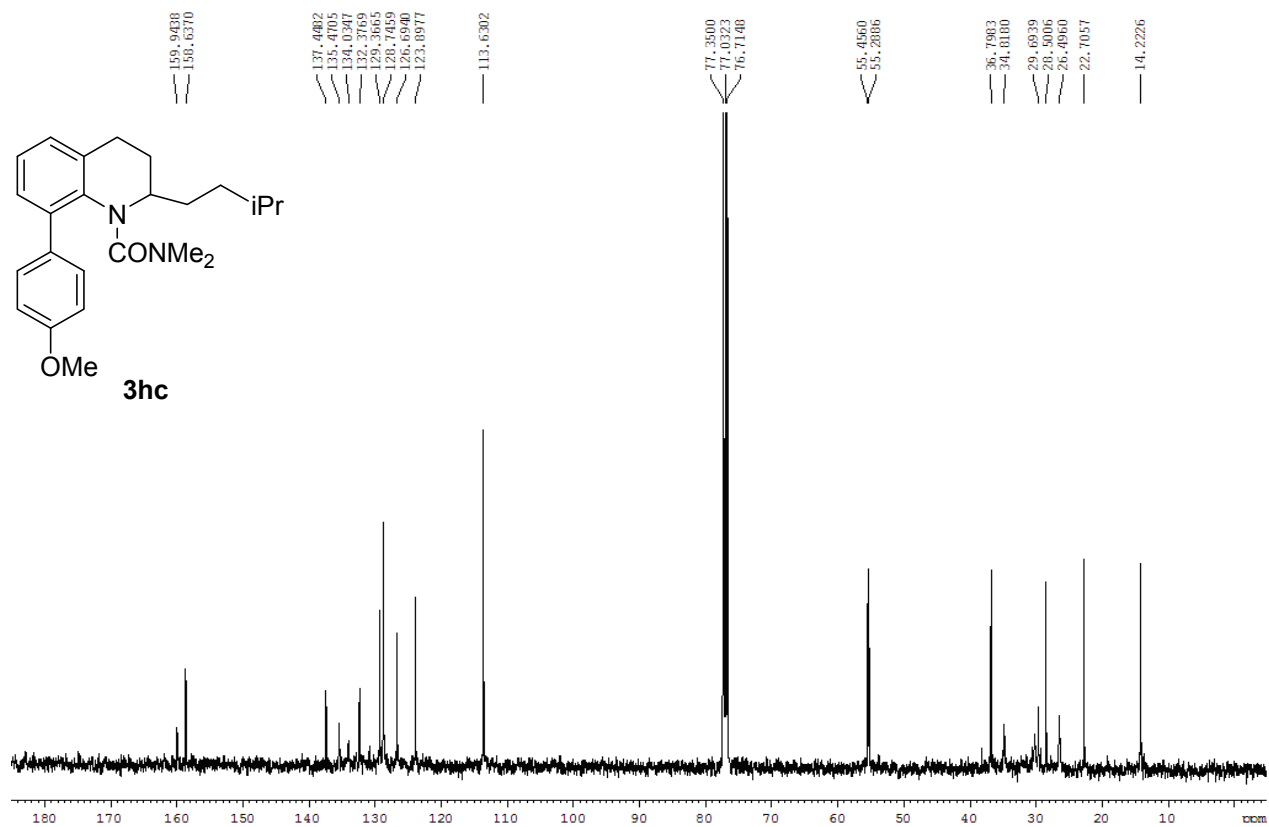

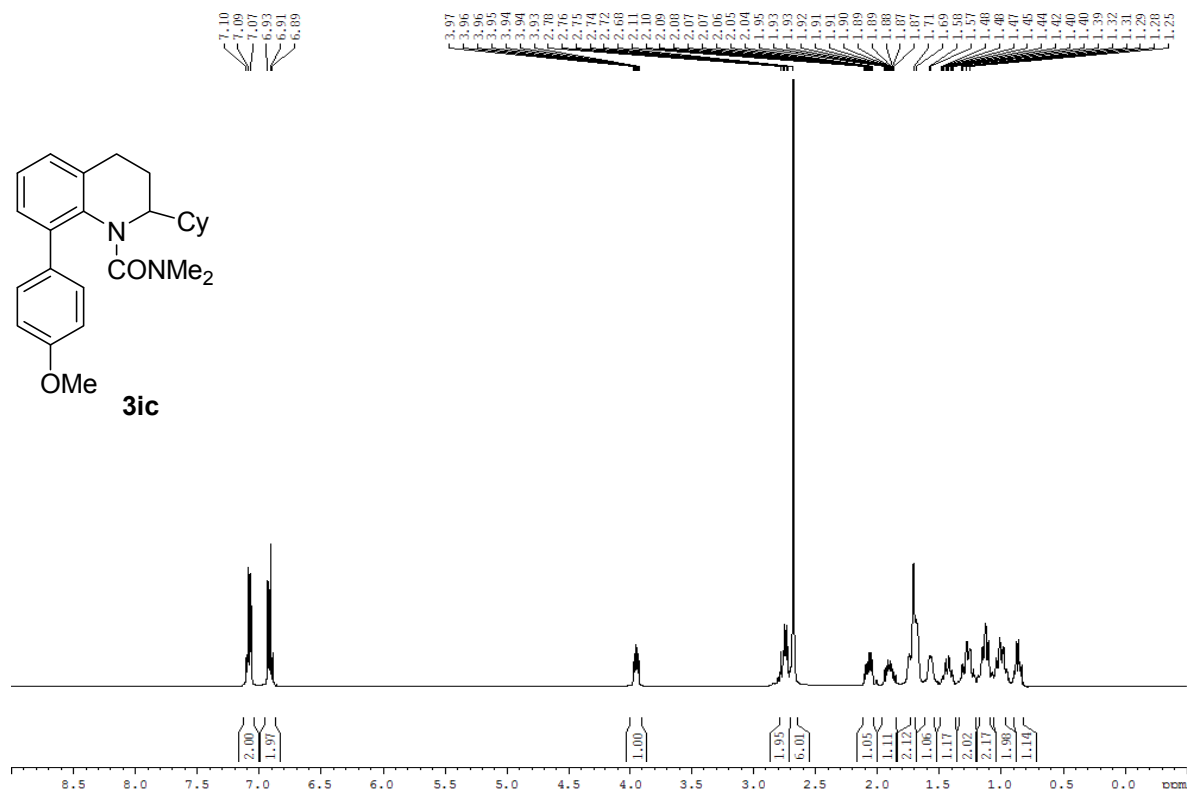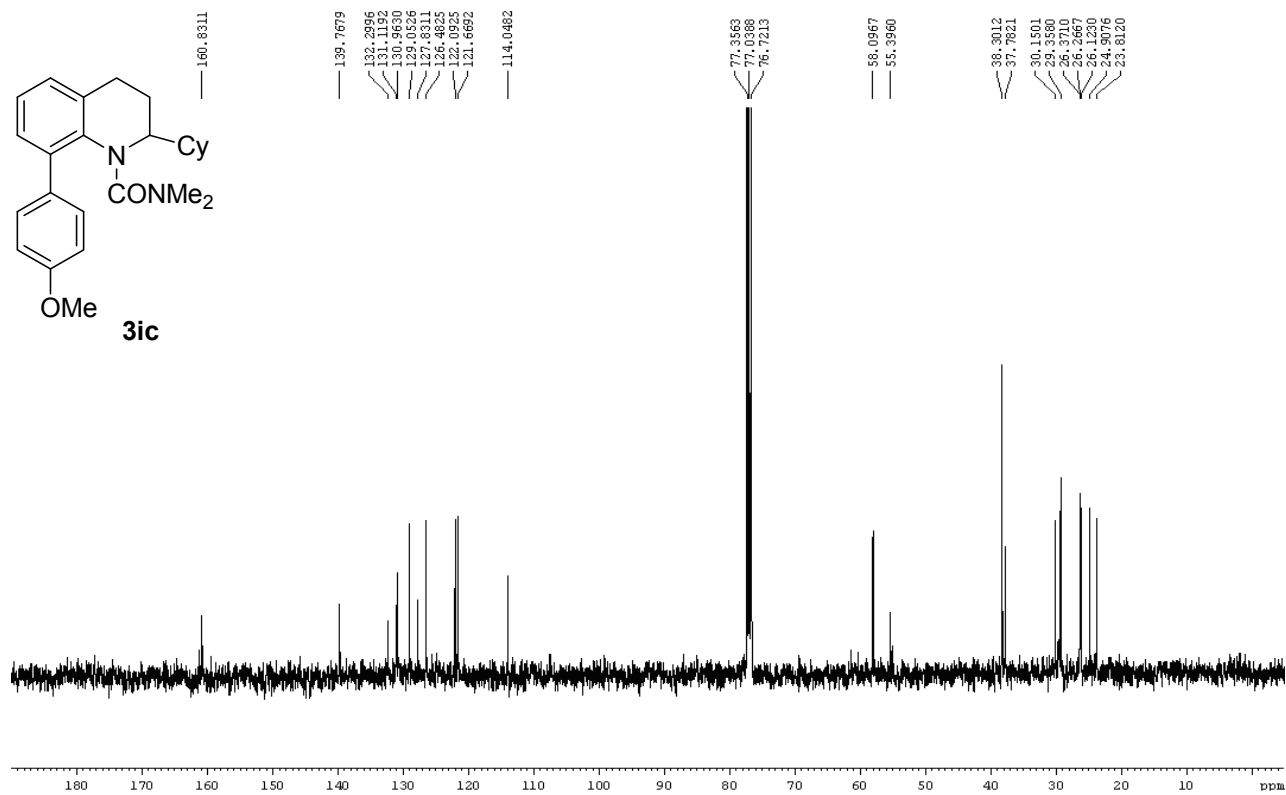

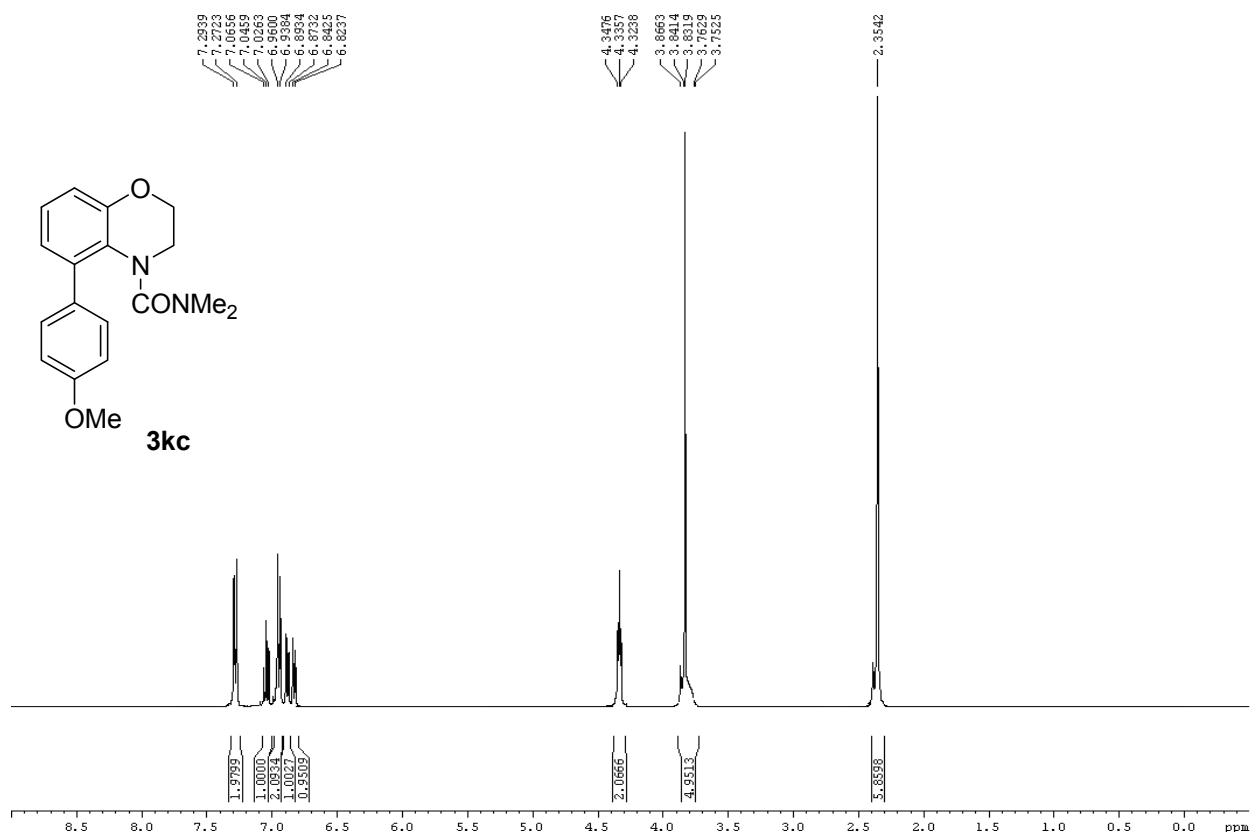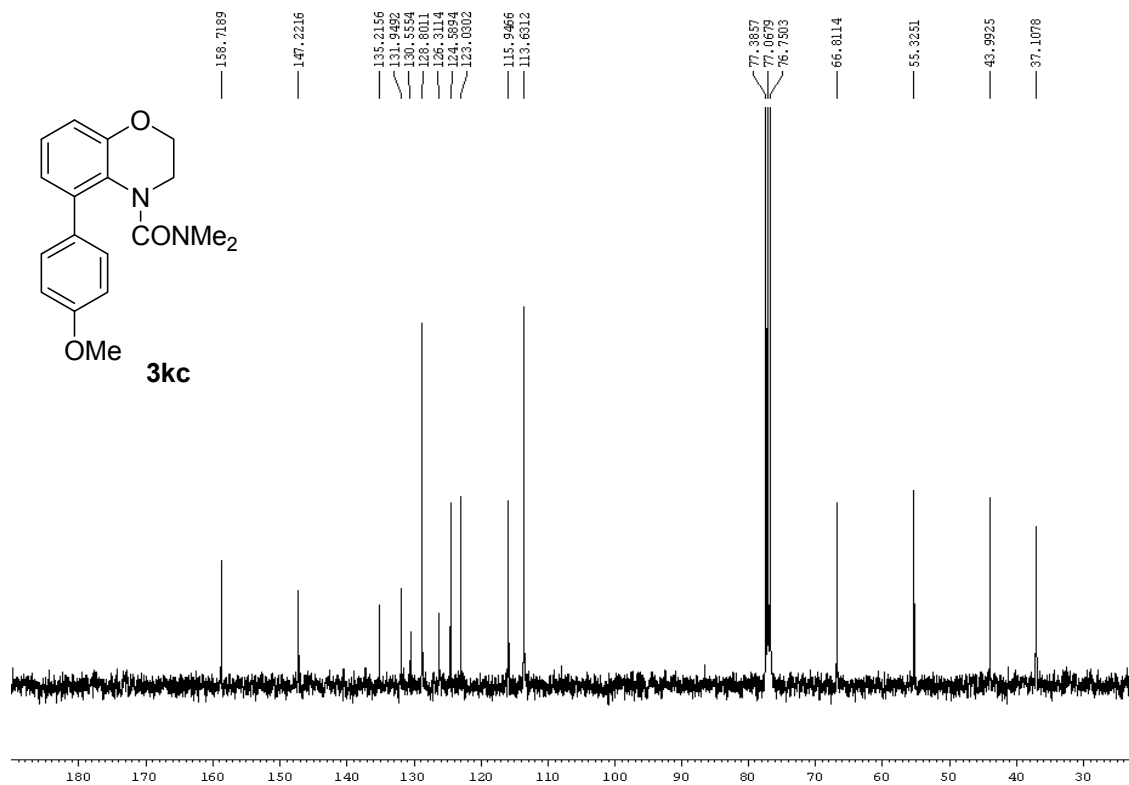



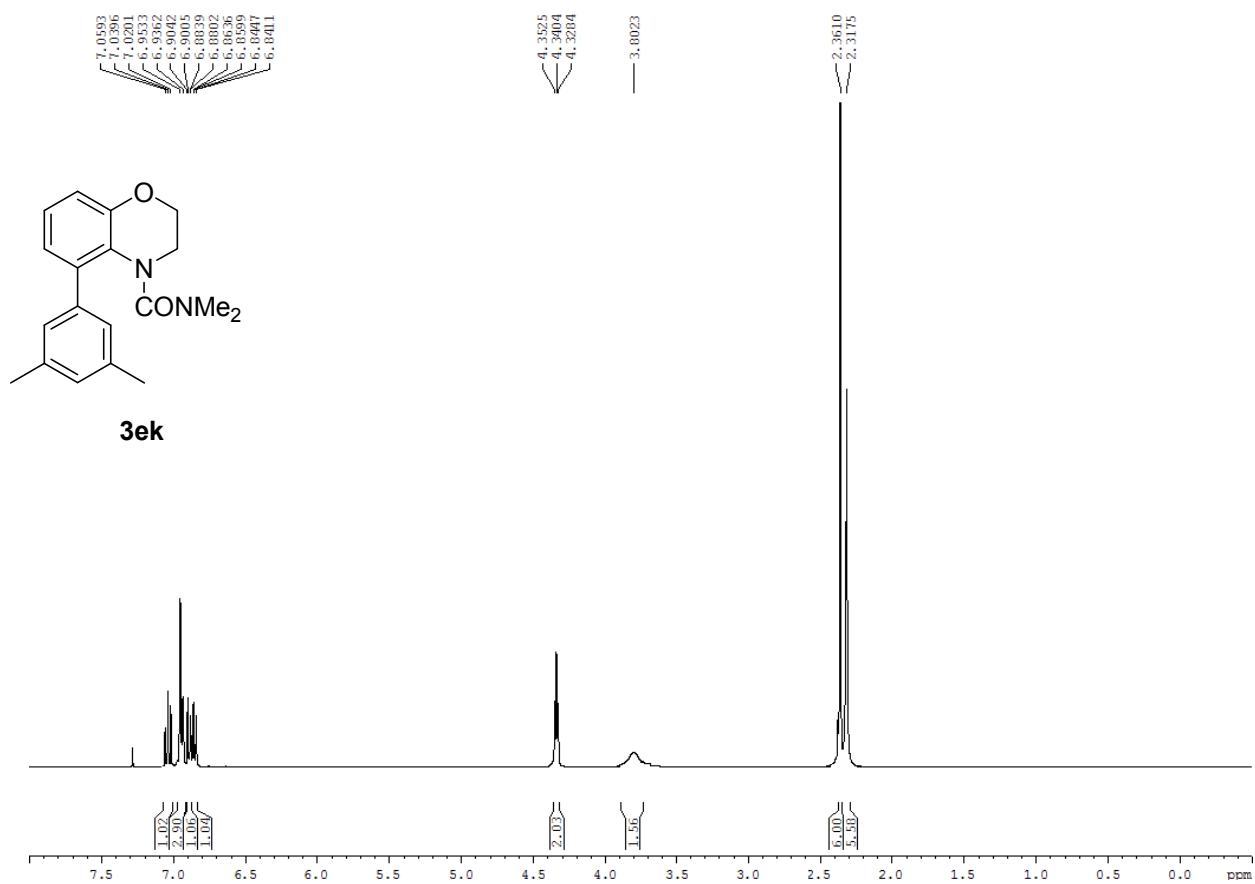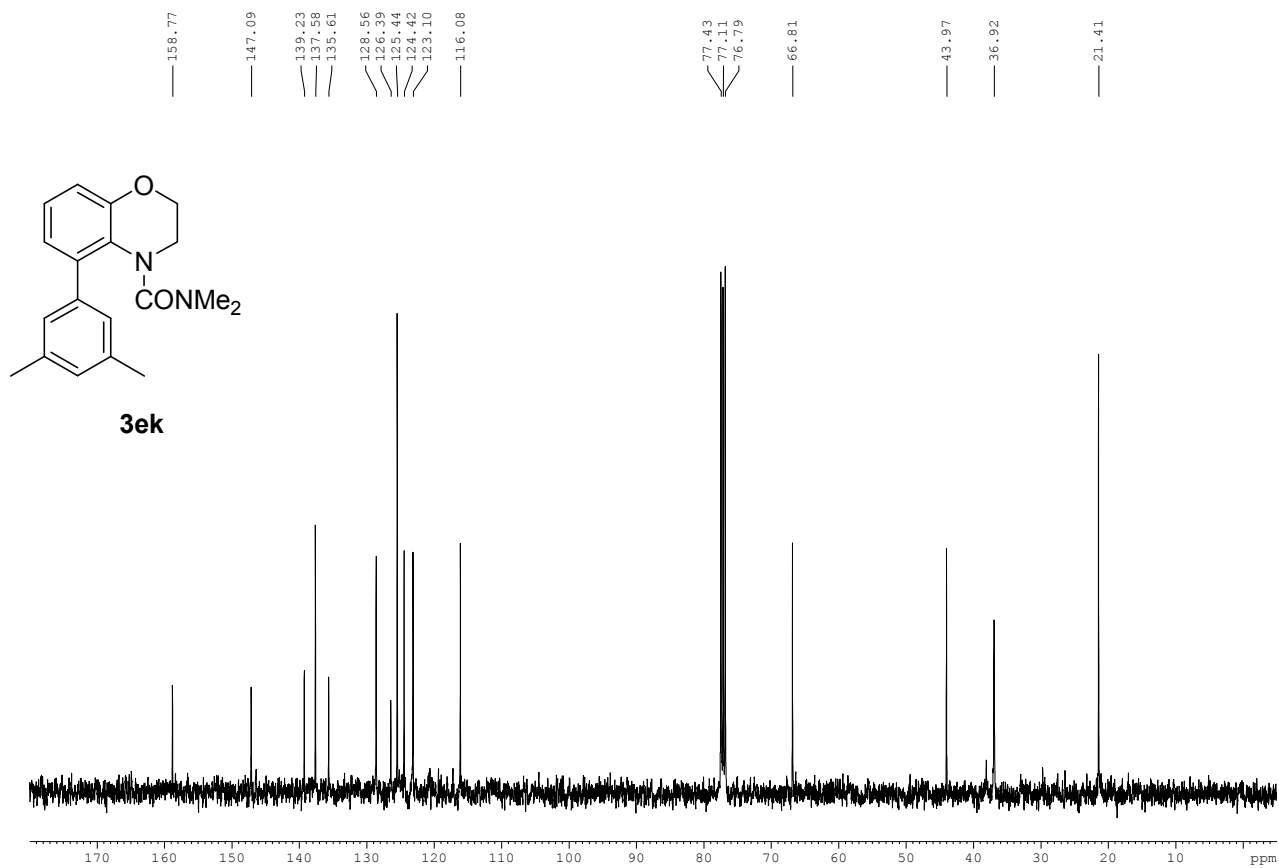

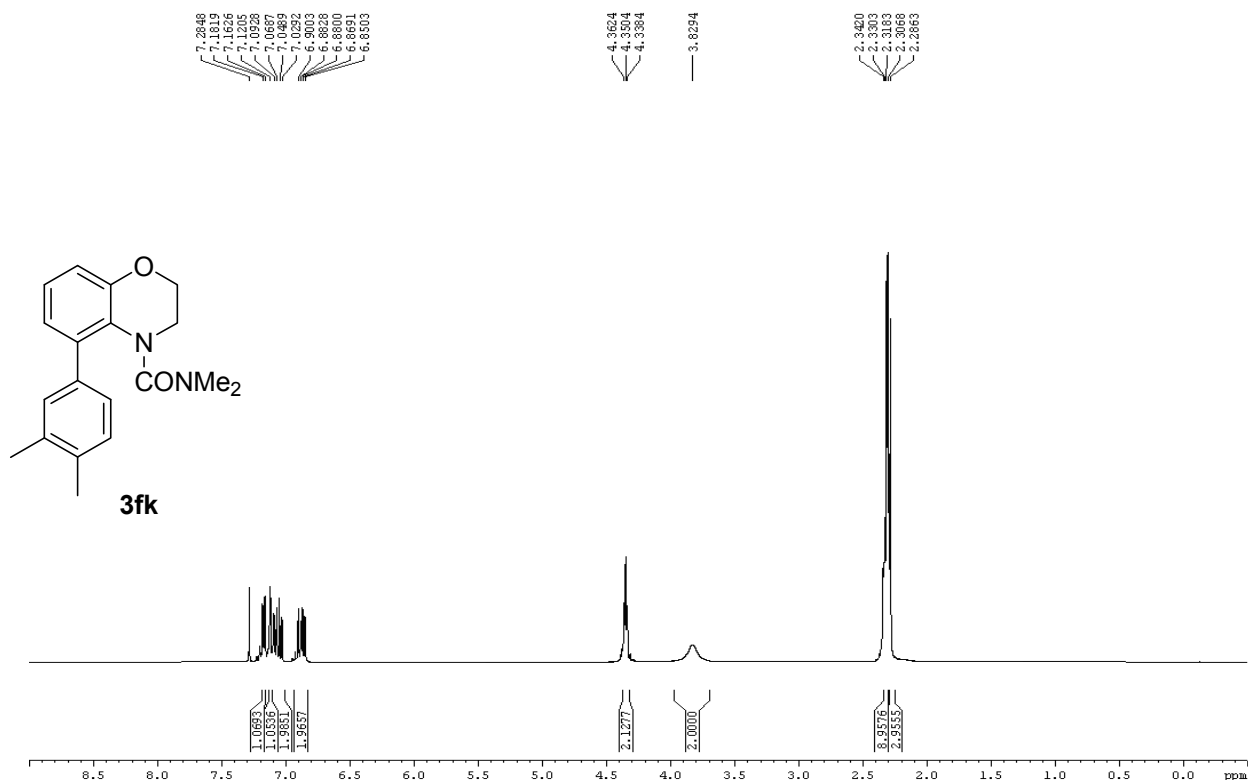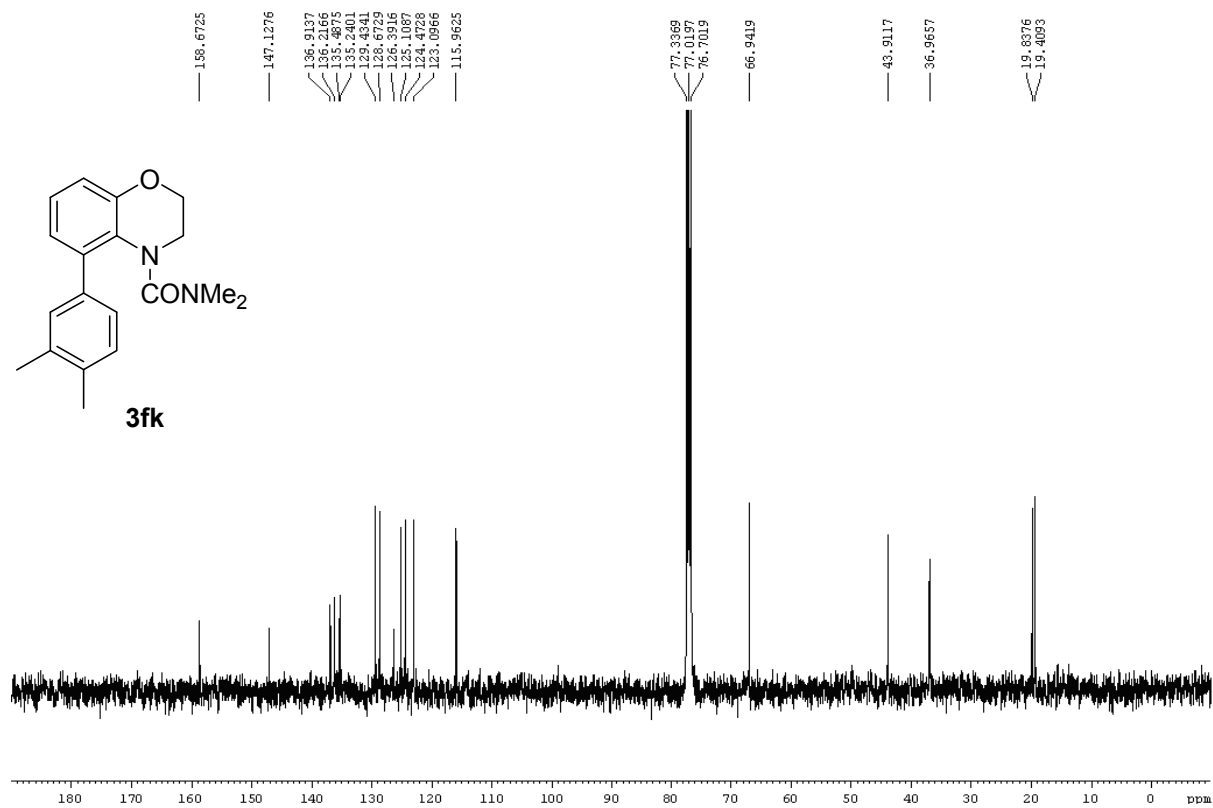

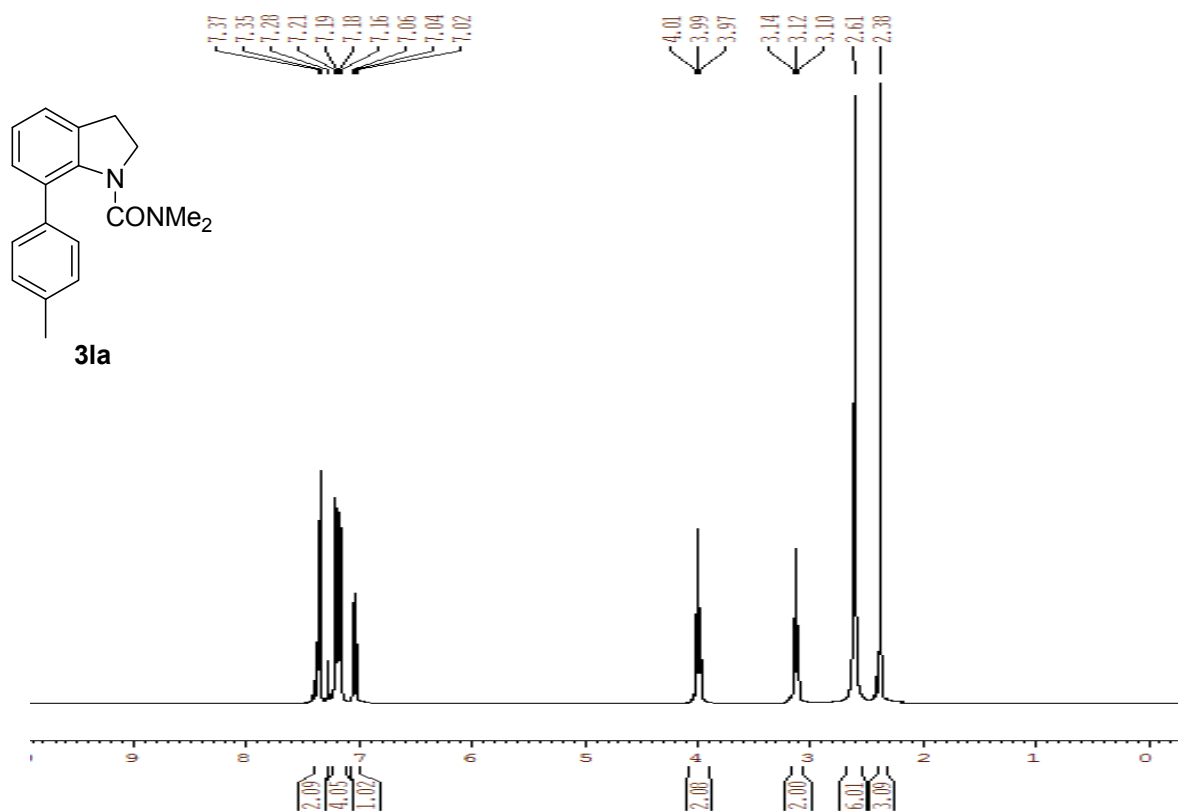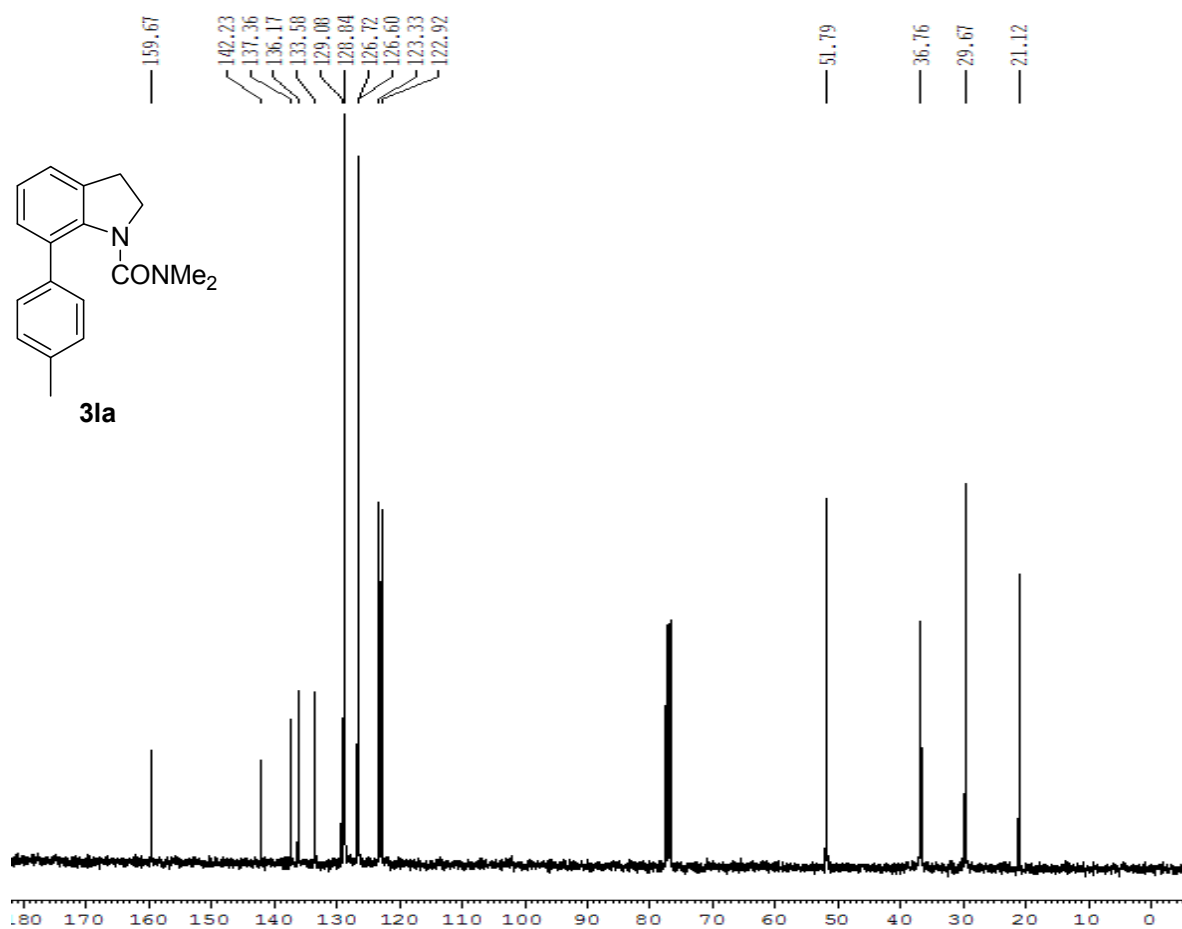

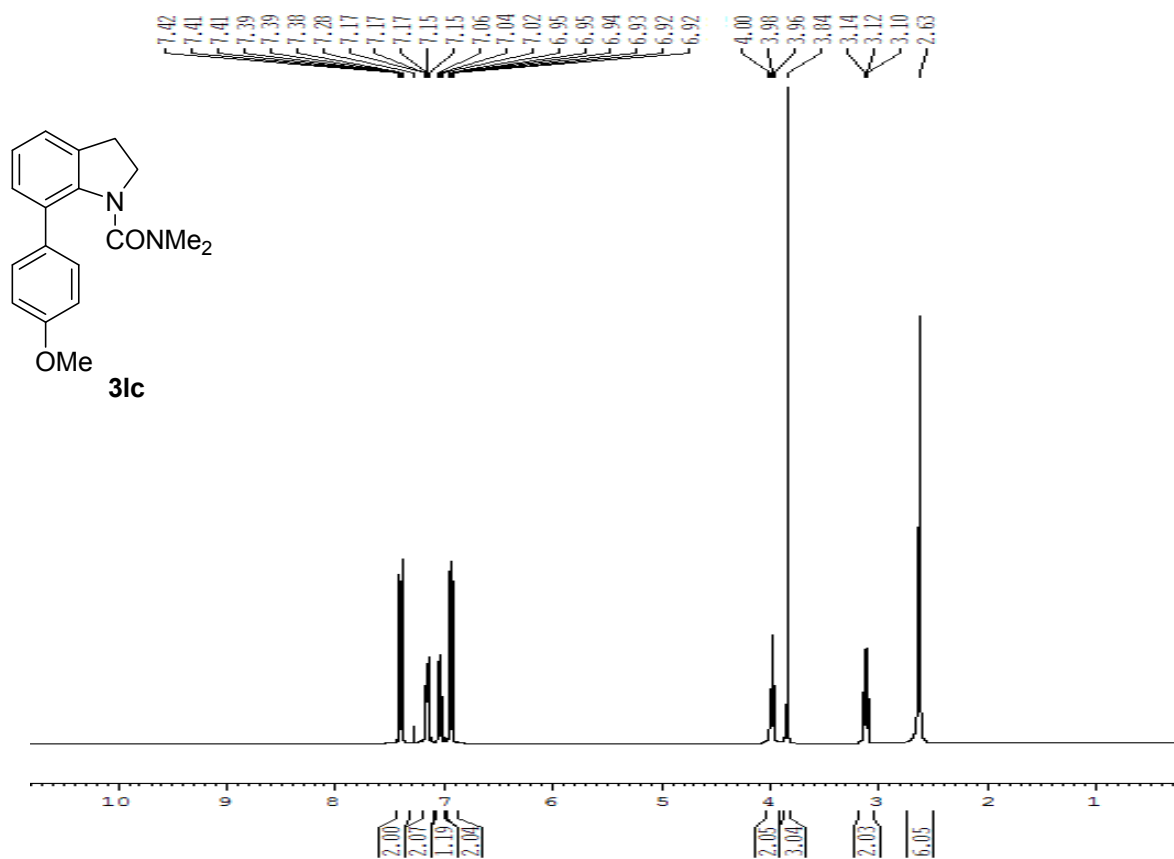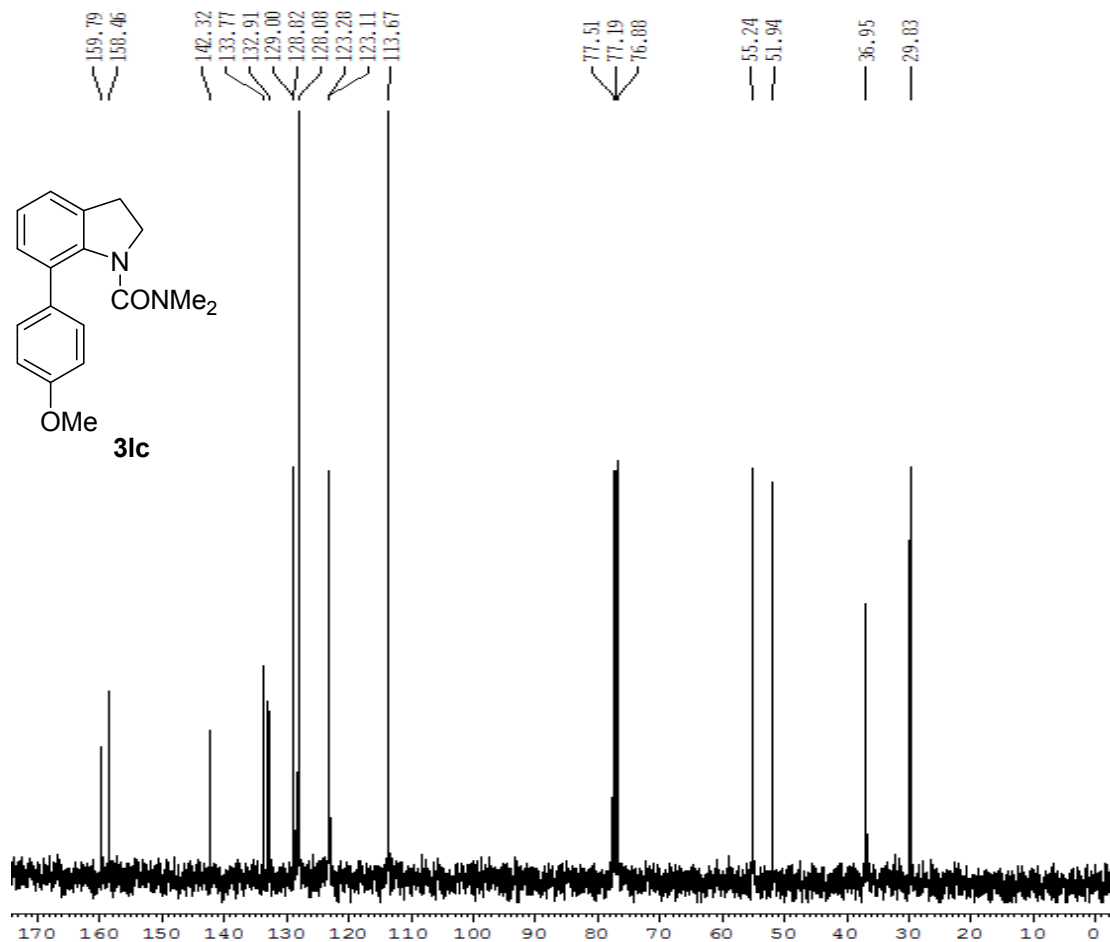

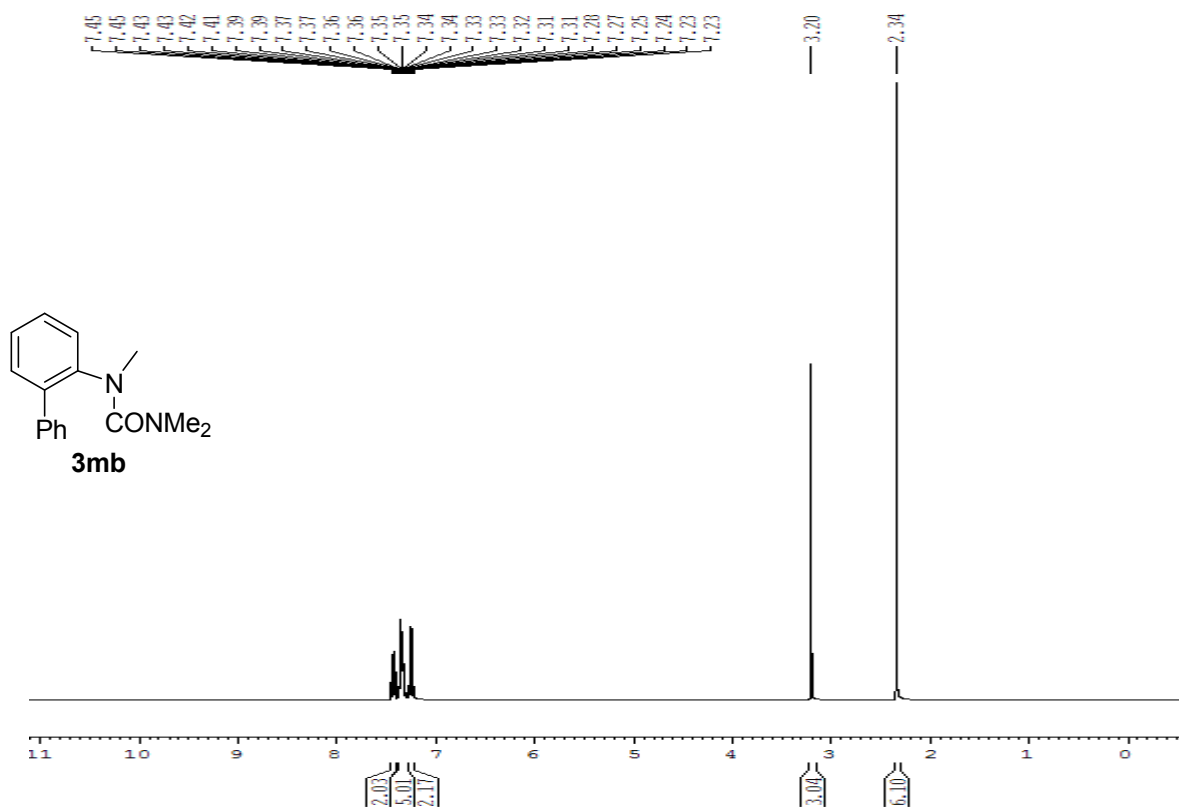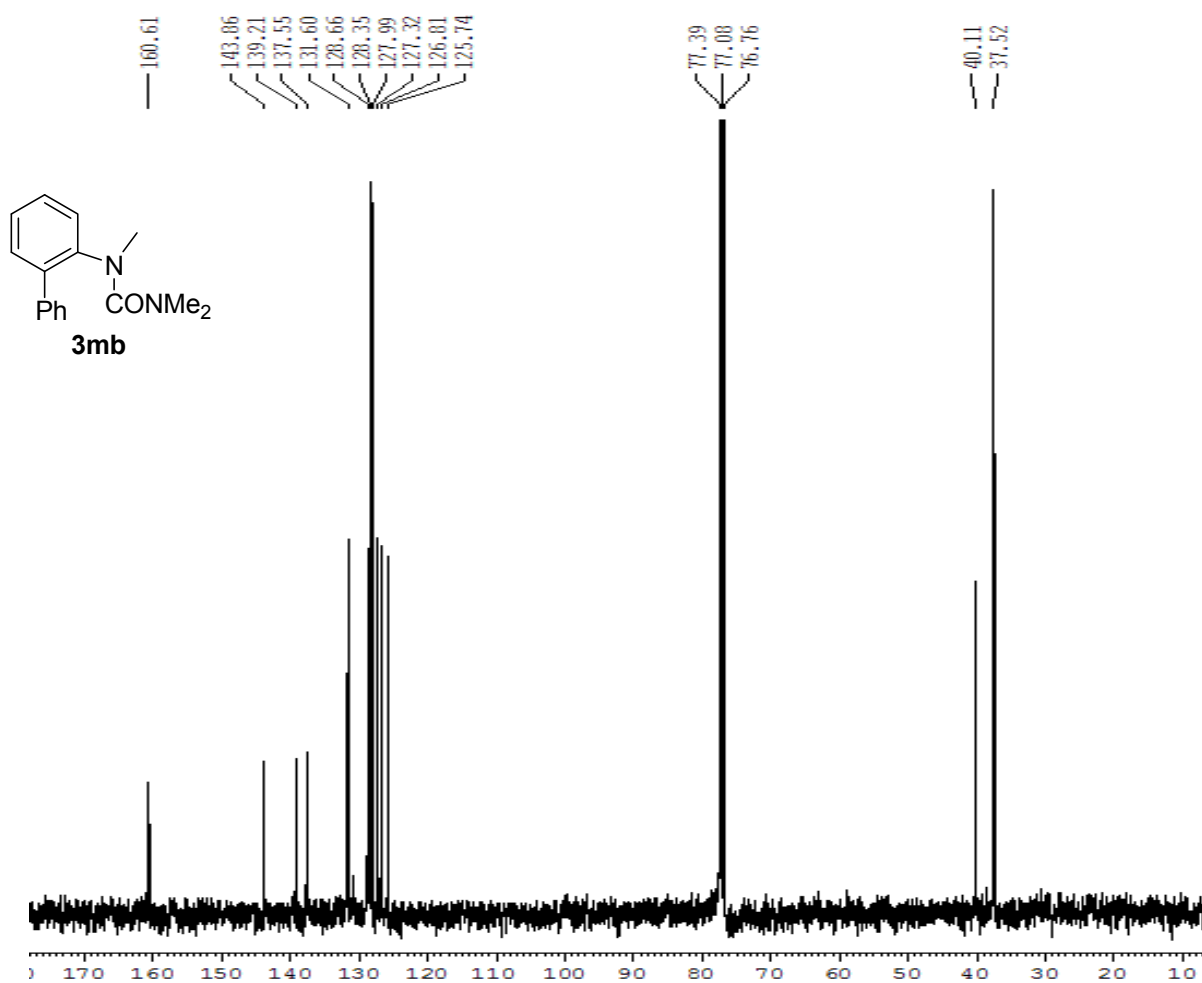

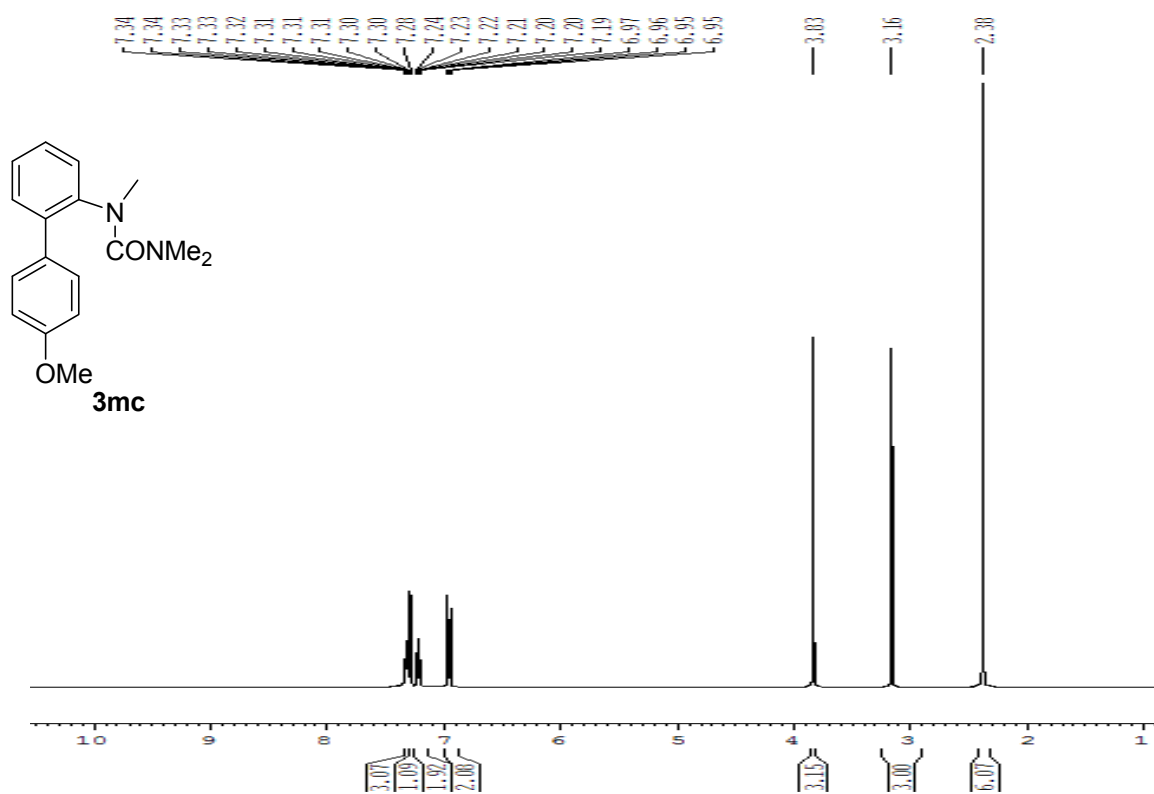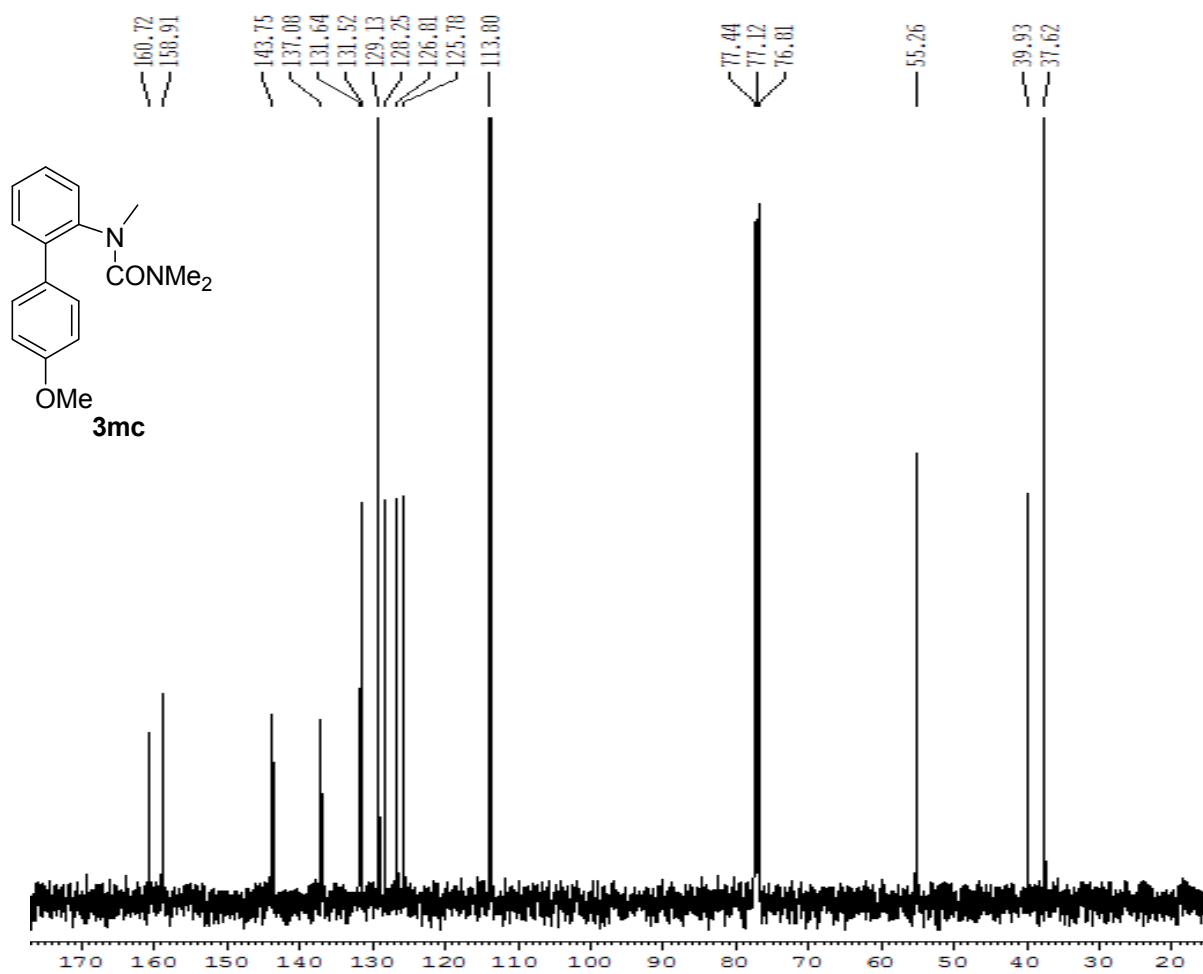

## 5. HPLC spectra of the chiral aryalted ureas

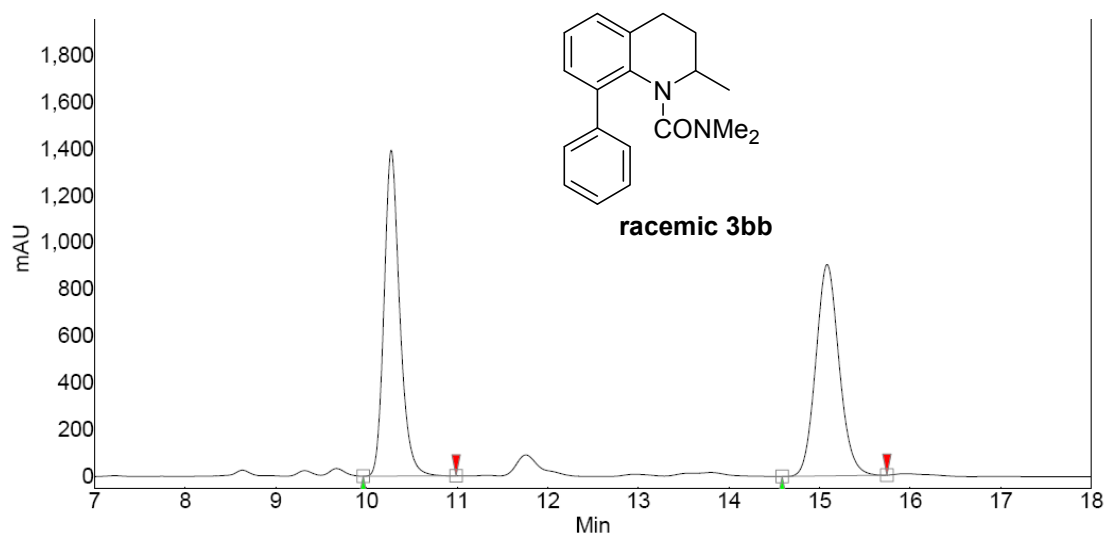

| Index | 文件名 | 时间 [Min] | 数量 [% 面积] | 高度 [mAU] | Area [mAU.Min] | Area % [%] |
|-------|-----|----------|-----------|----------|----------------|------------|
| 2     | 未知  | 10.27    | 50.87     | 1391.5   | 279.1          | 50.875     |
| 1     | 未知  | 15.08    | 49.13     | 901.9    | 269.5          | 49.125     |
| Total |     |          | 100.00    | 2293.4   | 548.6          | 100.000    |

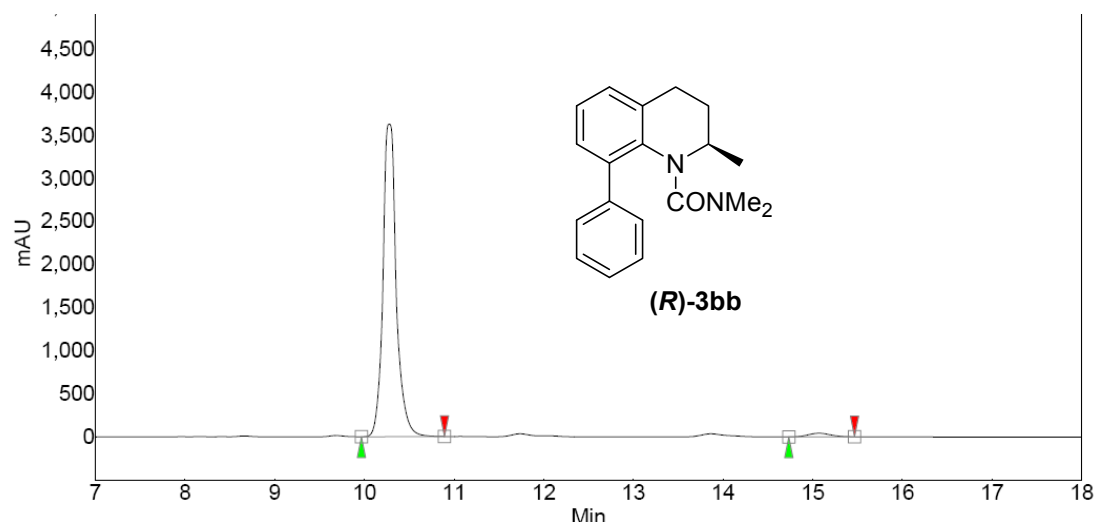

| Index | 文件名 | 时间 [Min] | 数量 [% 面积] | 高度 [mAU] | Area [mAU.Min] | Area % [%] |
|-------|-----|----------|-----------|----------|----------------|------------|
| 1     | 未知  | 10.28    | 98.12     | 3618.5   | 625.1          | 98.116     |
| 2     | 未知  | 15.07    | 1.88      | 41.7     | 12.0           | 1.884      |
| Total |     |          | 100.00    | 3660.3   | 637.1          | 100.000    |

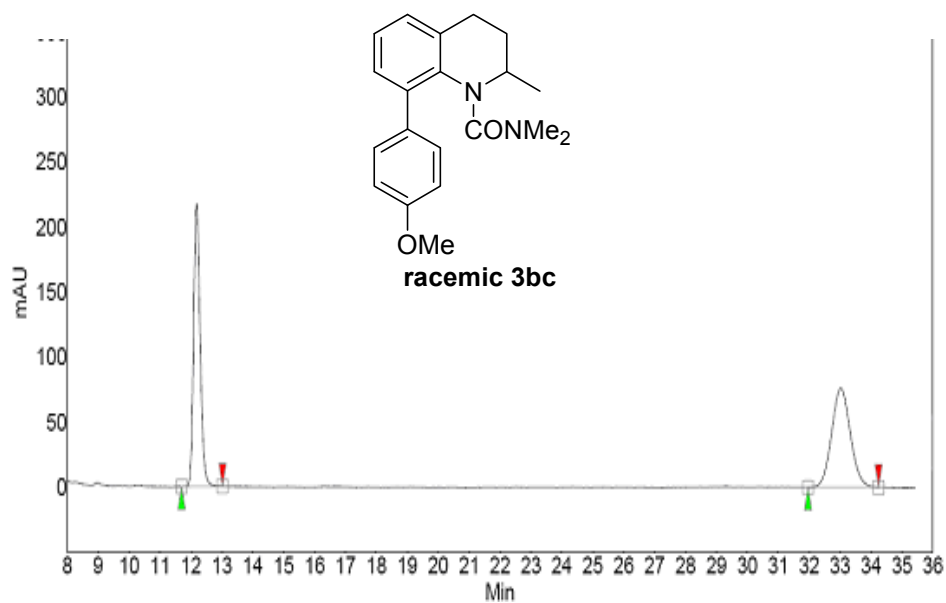

| Index | 文件名 | 时间 [Min] | 数量 [% 面积] | 高度 [mAU] | Area [mAU.Min] | Area % [%] |
|-------|-----|----------|-----------|----------|----------------|------------|
| 1     | 未知  | 12.18    | 50.02     | 217.2    | 53.4           | 50.019     |
| 2     | 未知  | 33.02    | 49.98     | 76.0     | 53.4           | 49.981     |
| Total |     |          | 100.00    | 293.2    | 106.8          | 100.000    |

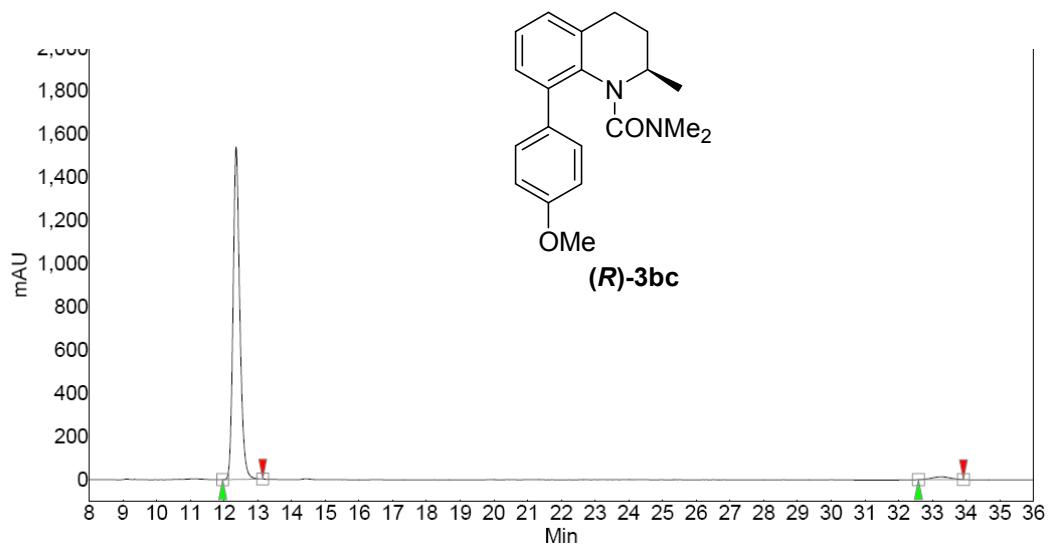

| Index | 文件名 | 时间 [Min] | 数量 [% 面积] | 高度 [mAU] | Area [mAU.Min] | Area % [%] |
|-------|-----|----------|-----------|----------|----------------|------------|
| 1     | 未知  | 12.36    | 97.77     | 1540.0   | 356.8          | 97.770     |
| 2     | 未知  | 33.26    | 2.23      | 12.7     | 8.1            | 2.230      |
| Total |     |          | 100.00    | 1552.7   | 365.0          | 100.000    |
